# Supplementary material for: Survival and clinicopathological characteristics of different histological grades of oral cavity squamous cell carcinoma: A single-center retrospective study
Source: PubMed Central journal article supplement (PMC7447052; doi:10.1371/journal.pone.0238103), 2020-08-25
Supplement: pone.0238103.s001.pdf [file pone.0238103.s001.pdf]

| Female0Male1 | Survival time (month) | Survival condition(dath"0") | Age at OSCC diagnosed | tumor site    | Smoking | Betel | Alcohol | Stage | T stage | N stage | ECS | CM | Recurrence | Recur"1" ade of tumor | Npositive1 |
|--------------|-----------------------|-----------------------------|-----------------------|---------------|---------|-------|---------|-------|---------|---------|-----|----|------------|-----------------------|------------|
| 0            | 17.64                 | 0                           | 53                    | ant tongue    | 0       | 0     | 0       | 1     | 1       | 1       | 0   | 0  | 2009/10/12 | 1                     | 2          |
| 0            | 25.08                 | 0                           | 51                    | ant tongue    | 0       | 0     | 0       | 1     | 1 x     | x       | 0   | 0  | 0000/00/00 | 0                     | 2          |
| 0            | 118.56                | 1                           | 70                    | ant tongue    | 0       | 0     | 0       | 1     | 1       | 0       | 0   | 0  | 0000/00/00 | 0                     | 2          |
| 0            | 48.13                 | 0                           | 85                    | lip           | 1       | 1     | 0       | 2     | 2       | 0       | 0   | 0  | 0000/00/00 | 0                     | 2          |
| 0            | 112.39                | 1                           | 28                    | ant tongue    | 0       | 0     | 0       | 4     | 2       | 2       | 1   | 0  | 0000/00/00 | 0                     | 2          |
| 0            | 51.18                 | 0                           | 41                    | alveolar ridg | 0       | 0     | 0       | 4     | 4       | 1       | 0   | 0  | 0000/00/00 | 0                     | 1          |
| 0            | 13.28                 | 0                           | 84                    | alveolar ridg | 0       | 0     | 0       | 2     | 2       | 0       | 0   | 0  | 0000/00/00 | 0                     | 2          |
| 0            | 106.72                | 1                           | 78                    | ant tongue    | 0       | 0     | 0       | 1     | 1       | 0       | 0   | 0  | 0000/00/00 | 0                     | 1          |
| 0            | 53.87                 | 0                           | 59                    | buccal muco   | 1       | 0     | 0       | 3     | 2       | 1       | 0   | 0  | 2011/1/31  | 1                     | 3          |
| 0            | 106.10                | 1                           | 74                    | lip           | 0       | 0     | 0       | 1     | 1 x     | x       | 0   | 0  | 0000/00/00 | 0                     | 2          |
| 0            | 70.75                 | 0                           | 56                    | ant tongue    | 0       | 0     | 0       | 2     | 2 x     | x       | 0   | 0  | 0000/00/00 | 0                     | 2          |
| 0            | 84.30                 | 0                           | 83                    | buccal muco   | 0       | 0     | 0       | 3     | 3       | 0       | 0   | 0  | 0000/00/00 | 0                     | 2          |
| 0            | 21.34                 | 0                           | 52                    | ant tongue    | 0       | 0     | 0       | 1     | 1       | 0       | 0   | 0  | 2011/5/24  | 1                     | 2          |
| 0            | 117.44                | 1                           | 54                    | buccal muco   | 0       | 0     | 0       | 1     | 1       | 0       | 0   | 0  | 0000/00/00 | 0                     | 1          |
| 0            | 16.23                 | 0                           | 68                    | alveolar ridg | 0       | 0     | 0       | 2     | 2       | 0       | 0   | 0  | 2011/2/18  | 1                     | 2          |
| 0            | 103.51                | 1                           | 79                    | lip           | 0       | 0     | 0       | 1     | 1 x     | x       | 0   | 1  | 0000/00/00 | 0                     | 2          |
| 0            | 101.70                | 1                           | 59                    | ant tongue    | 1       | 0     | 1       | 2     | 2       | 0       | 0   | 0  | 0000/00/00 | 0                     | 2          |
| 0            | 100.98                | 1                           | 44                    | rmt           | 0       | 0     | 0       | 4     | 4 x     | x       | 0   | 1  | 0000/00/00 | 0                     | 3          |
| 0            | 100.98                | 1                           | 56                    | ant tongue    | 0       | 0     | 0       | 1     | 1       | 0       | 0   | 0  | 0000/00/00 | 0                     | 2          |
| 0            | 101.31                | 1                           | 37                    | ant tongue    | 0       | 0     | 0       | 2     | 2       | 0       | 0   | 0  | 2011/7/22  | 1                     | 2          |
| 0            | 100.00                | 1                           | 63                    | ant tongue    | 0       | 0     | 0       | 1     | 1       | 0       | 0   | 0  | 2015/6/12  | 1                     | 2          |
| 0            | 55.41                 | 0                           | 51                    | ant tongue    | 0       | 0     | 0       | 1     | 1       | 0       | 1   | 0  | 0000/00/00 | 0                     | 2          |
| 0            | 98.79                 | 1                           | 70                    | lip           | 0       | 0     | 0       | 1     | 1 x     | x       | 0   | 0  | 0000/00/00 | 0                     | 2          |
| 0            | 98.92                 | 1                           | 38                    | ant tongue    | 0       | 0     | 0       | 1     | 1 x     | x       | 0   | 0  | 0000/00/00 | 0                     | 2          |
| 0            | 98.82                 | 1                           | 49                    | lip           | 1       | 0     | 0       | 1     | 1       | 0       | 0   | 0  | 0000/00/00 | 0                     | 2          |
| 0            | 20.85                 | 0                           | 70                    | ant tongue    | 0       | 0     | 0       | 1     | 1 x     | x       | 0   | 0  | 2011/6/27  | 1                     | 2          |
| 0            | 95.41                 | 1                           | 50                    | rmt           | 1       | 0     | 0       | 4     | 4       | 0       | 0   | 0  | 0000/00/00 | 0                     | 2          |
| 0            | 11.54                 | 0                           | 62                    | buccal muco   | 0       | 0     | 0       | 4     | 3       | 2       | 0   | 0  | 2012/2/7   | 1                     | 2          |
| 0            | 29.41                 | 0                           | 71                    | ant tongue    | 0       | 0     | 0       | 1     | 1       | 0       | 0   | 0  | 0000/00/00 | 0                     | 1          |
| 0            | 40.72                 | 0                           | 42                    | buccal muco   | 0       | 0     | 0       | 1     | 1 x     | x       | 0   | 0  | 2012/3/22  | 1                     | 1          |
| 0            | 96.30                 | 1                           | 36                    | ant tongue    | 1       | 0     | 0       | 4     | 4       | 1       | 0   | 0  | 0000/00/00 | 0                     | 2          |
| 0            | 10.75                 | 0                           | 64                    | ant tongue    | 0       | 0     | 0       | 1     | 1 x     | x       | 0   | 0  | 2011/10/14 | 1                     | 2          |
| 0            | 94.36                 | 1                           | 79                    | buccal muco   | 1       | 0     | 0       | 1     | 1 x     | x       | 0   | 0  | 0000/00/00 | 0                     | 1          |
| 0            | 91.38                 | 1                           | 35                    | ant tongue    | 0       | 0     | 0       | 1     | 1       | 0       | 0   | 1  | 0000/00/00 | 0                     | 3          |
| 0            | 91.84                 | 1                           | 79                    | ant tongue    | 0       | 0     | 0       | 2     | 2       | 0       | 0   | 0  | 2012/6/11  | 1                     | 2          |
| 0            | 90.69                 | 1                           | 69                    | ant tongue    | 0       | 0     | 0       | 2     | 2       | 0       | 0   | 0  | 0000/00/00 | 0                     | 2          |
| 0            | 8.30                  | 0                           | 81                    | ant tongue    | 0       | 0     | 0       | 1     | 1 x     | x       | 0   | 0  | 2012/2/17  | 1                     | 2          |
| 0            | 28.49                 | 0                           | 48                    | ant tongue    | 0       | 0     | 0       | 2     | 2 x     | x       | 0   | 0  | 13-Aug     | 1                     | 2          |
| 0            | 89.51                 | 1                           | 52                    | alveolar ridg | 0       | 0     | 0       | 1     | 1       | 0       | 0   | 0  | 0000/00/00 | 0                     | 2          |
| 0            | 28.79                 | 0                           | 75                    | ant tongue    | 0       | 0     | 0       | 1     | 1       | 0       | 0   | 0  | 0000/00/00 | 0                     | 2          |
| 0            | 89.28                 | 1                           | 63                    | ant tongue    | 0       | 0     | 0       | 2     | 2       | 0       | 0   | 0  | 0000/00/00 | 0                     | 2          |
| 0            | 88.52                 | 1                           | 73                    | alveolar ridg | 1       | 1     | 0       | 4     | 4       | 0       | 0   | 0  | 0000/00/00 | 0                     | 2          |
| 0            | 93.54                 | 1                           | 79                    | alveolar ridg | 1       | 0     | 0       | 1     | 1 x     | x       | 0   | 0  | 0000/00/00 | 0                     | 1          |
| 0            | 85.67                 | 1                           | 75                    | buccal muco   | 0       | 0     | 0       | 1     | 1       | 0       | 0   | 0  | 0000/00/00 | 0                     | 2          |
| 0            | 14.56                 | 0                           | 59                    | buccal muco   | 0       | 0     | 0       | 4     | 4       | 2       | 1   | 0  | 2012/12/3  | 1                     | 2          |
| 0            | 21.74                 | 0                           | 83                    | ant tongue    | 0       | 0     | 0       | 2     | 2       | 0       | 0   | 0  | 2013/9/2   | 1                     | 2          |
| 0            | 97.90                 | 1                           | 49                    | alveolar ridg | 1       | 0     | 0       | 1     | 1       | 0       | 0   | 0  | 0000/00/00 | 0                     | 2          |
| 0            | 82.56                 | 1                           | 46                    | ant tongue    | 0       | 0     | 0       | 3     | 1       | 1       | 0   | 0  | 0000/00/00 | 0                     | 2          |
| 0            | 7.44                  | 0                           | 77                    | ant tongue    | 0       | 0     | 0       | 2     | 2 x     | x       | 0   | 0  | 2012/11/29 | 1                     | 2          |
| 0            | 34.56                 | 0                           | 53                    | buccal muco   | 0       | 0     | 0       | 3     | 1       | 1       | 1   | 0  | 0000/00/00 | 0                     | 2          |
| 0            | 78.56                 | 1                           | 61                    | ant tongue    | 0       | 0     | 0       | 1     | 1 x     | x       | 0   | 0  | 0000/00/00 | 0                     | 1          |
| 0            | 41.90                 | 0                           | 35                    | alveolar ridg | 0       | 0     | 0       | 4     | 4       | 0       | 0   | 0  | 2015/5/15  | 1                     | 3          |
| 0            | 73.61                 | 1                           | 78                    | alveolar ridg | 0       | 0     | 0       | 2     | 2       | 0       | 0   | 0  | 0000/00/00 | 0                     | 2          |
| 0            | 61.77                 | 0                           | 85                    | buccal muco   | 0       | 0     | 0       | 2     | 2       | 0       | 0   | 0  | 0000/00/00 | 0                     | 2          |
| 0            | 34.13                 | 0                           | 73                    | buccal muco   | 0       | 0     | 0       | 3     | 2       | 1       | 1   | 0  | 0000/00/00 | 0                     | 2          |
| 0            | 8.30                  | 0                           | 50                    | buccal muco   | 0       | 0     | 0       | 4     | 4 x     | x       | 0   | 0  | 0000/00/00 | 0                     | 2          |
| 0            | 68.20                 | 1                           | 56                    | ant tongue    | 0       | 0     | 0       | 1     | 1       | 0       | 0   | 0  | 0000/00/00 | 0                     | 2          |
| 0            | 11.54                 | 0                           | 65                    | alveolar ridg | 1       | 0     | 0       | 4     | 4       | 2       | 1   | 0  | 2014/11/10 | 1                     | 2          |
| 0            | 59.80                 | 1                           | 53                    | ant tongue    | 0       | 0     | 0       | 1     | 1 x     | x       | 0   | 0  | 2014/10/7  | 1                     | 2          |
| 0            | 59.48                 | 1                           | 46                    | ant tongue    | 0       | 0     | 0       | 1     | 1       | 0       | 0   | 0  | 0000/00/00 | 0                     | 2          |
| 0            | 59.38                 | 1                           | 49                    | ant tongue    | 0       | 0     | 0       | 1     | 1       | 0       | 0   | 1  | 0000/00/00 | 0                     | 2          |
| 0            | 7.93                  | 0                           | 51                    | ant tongue    | 0       | 0     | 1       | 4     | 4       | 0       | 0   | 0  | 2014/12/10 | 1                     | 2          |
| 0            | 58.33                 | 1                           | 59                    | buccal muco   | 0       | 0     | 0       | 1     | 1 x     | x       | 0   | 0  | 0000/00/00 | 0                     | 1          |
| 0            | 56.39                 | 1                           | 55                    | ant tongue    | 0       | 0     | 0       | 1     | 1       | 0       | 0   | 0  | 2017/8/4   | 1                     | 1          |
| 0            | 56.26                 | 1                           | 31                    | ant tongue    | 0       | 0     | 0       | 1     | 1 x     | x       | 0   | 0  | 0000/00/00 | 0                     | 2          |
| 0            | 19.08                 | 0                           | 66                    | buccal muco   | 0       | 0     | 0       | 4     | 4       | 1       | 1   | 1  | 2015/9/4   | 1                     | 2          |
| 0            | 54.20                 | 1                           | 56                    | ant tongue    | 0       | 0     | 0       | 1     | 1 x     | x       | 0   | 0  | 0000/00/00 | 0                     | 2          |
| 0            | 32.07                 | 0                           | 85                    | lip           | 1       | 1     | 0       | 1     | 1       | 0       | 0   | 0  | 2016/12/8  | 1                     | 2          |
| 0            | 54.03                 | 1                           | 74                    | alveolar ridg | 0       | 0     | 1       | 1     | 1       | 0       | 0   | 0  | 0000/00/00 | 0                     | 2          |
| 0            | 21.31                 | 0                           | 87                    | ant tongue    | 0       | 0     | 0       | 4     | 1       | 2       | 1   | 0  | 0000/00/00 | 0                     | 2          |
| 0            | 8.33                  | 0                           | 55                    | buccal muco   | 0       | 0     | 0       | 1     | 1 x     | x       | 0   | 0  | 0000/00/00 | 0                     | 3          |

|   |        |   |    |                |   |   |   |   |     |   |   |   |            |   |   |   |
|---|--------|---|----|----------------|---|---|---|---|-----|---|---|---|------------|---|---|---|
| 0 | 51.11  | 1 | 75 | ant tongue     | 0 | 0 | 0 | 4 | 4   | 1 | 0 | 0 | 0000/00/00 | 0 | 2 | 1 |
| 0 | 50.85  | 1 | 75 | ant tongue     | 0 | 0 | 0 | 1 | 1   | 0 | 0 | 0 | 0000/00/00 | 0 | 2 | 0 |
| 0 | 32.66  | 0 | 63 | ant tongue     | 0 | 0 | 0 | 1 | 1 x | x | 0 | 0 | 0000/00/00 | 0 | 2 | 0 |
| 0 | 48.98  | 1 | 80 | lip            | 0 | 0 | 0 | 2 | 2   | 0 | 0 | 0 | 0000/00/00 | 0 | 2 | 0 |
| 0 | 16.49  | 0 | 52 | mouth floor    | 0 | 0 | 0 | 1 | 1   | 0 | 0 | 0 | 0000/00/00 | 0 | 2 | 0 |
| 0 | 45.97  | 1 | 69 | ant tongue     | 0 | 0 | 0 | 1 | 1   | 0 | 0 | 0 | 0000/00/00 | 0 | 2 | 0 |
| 0 | 43.77  | 1 | 53 | ant tongue     | 0 | 0 | 0 | 1 | 1   | 0 | 0 | 0 | 0000/00/00 | 0 | 2 | 0 |
| 0 | 43.02  | 1 | 58 | ant tongue     | 0 | 0 | 0 | 1 | 1 x | x | 0 | 0 | 0000/00/00 | 0 | 2 | 0 |
| 0 | 42.79  | 1 | 74 | alveolar ridgr | 0 | 0 | 0 | 4 | 4   | 0 | 0 | 1 | 0000/00/00 | 0 | 2 | 0 |
| 0 | 42.52  | 1 | 60 | ant tongue     | 1 | 0 | 0 | 3 | 2   | 1 | 0 | 0 | 0000/00/00 | 0 | 2 | 1 |
| 0 | 10.59  | 0 | 38 | ant tongue     | 1 | 1 | 1 | 4 | 4   | 2 | 1 | 0 | 2016/12/8  | 1 | 1 | 1 |
| 0 | 36.75  | 1 | 63 | buccal muco    | 1 | 1 | 0 | 4 | 1   | 2 | 1 | 0 | 0000/00/00 | 0 | 2 | 1 |
| 0 | 34.46  | 1 | 36 | alveolar ridgr | 0 | 0 | 0 | 4 | 4   | 0 | 0 | 0 | 0000/00/00 | 0 | 2 | 0 |
| 0 | 5.08   | 0 | 82 | ant tongue     | 0 | 0 | 0 | 4 | 4   | 1 | 0 | 0 | 2016/11/18 | 1 | 2 | 1 |
| 0 | 31.70  | 1 | 73 | buccal muco    | 0 | 0 | 0 | 1 | 1   | 0 | 0 | 0 | 0000/00/00 | 0 | 2 | 0 |
| 0 | 7.67   | 0 | 72 | ant tongue     | 0 | 0 | 0 | 2 | 2   | 0 | 0 | 0 | 2017/5/3   | 1 | 2 | 0 |
| 0 | 30.43  | 1 | 64 | ant tongue     | 1 | 1 | 0 | 1 | 1   | 0 | 0 | 0 | 0000/00/00 | 0 | 2 | 0 |
| 0 | 2.30   | 0 | 19 | ant tongue     | 0 | 0 | 0 | 4 | 4   | 0 | 0 | 0 | 0000/00/00 | 0 | 3 | 0 |
| 0 | 26.89  | 1 | 63 | ant tongue     | 0 | 0 | 0 | 1 | 1   | 0 | 0 | 0 | 0000/00/00 | 0 | 2 | 0 |
| 0 | 26.79  | 1 | 55 | buccal muco    | 1 | 1 | 1 | 1 | 1   | 0 | 0 | 0 | 0000/00/00 | 0 | 2 | 0 |
| 0 | 1.87   | 0 | 33 | ant tongue     | 0 | 0 | 0 | 4 | 4   | 2 | 1 | 0 | 0000/00/00 | 0 | 2 | 1 |
| 0 | 26.20  | 1 | 72 | lip            | 0 | 0 | 0 | 1 | 1 x | x | 0 | 0 | 0000/00/00 | 0 | 2 | 0 |
| 0 | 26.03  | 1 | 71 | buccal muco    | 1 | 0 | 0 | 1 | 1   | 0 | 0 | 0 | 2017/10/11 | 1 | 2 | 0 |
| 0 | 25.74  | 1 | 73 | alveolar ridgr | 0 | 0 | 0 | 1 | 1 x | x | 0 | 0 | 0000/00/00 | 0 | 2 | 0 |
| 0 | 25.34  | 1 | 37 | ant tongue     | 0 | 0 | 0 | 2 | 2 x | x | 0 | 0 | 2018/4/10  | 1 | 2 | 0 |
| 0 | 24.89  | 1 | 72 | lip            | 0 | 0 | 0 | 3 | 2   | 1 | 1 | 0 | 0000/00/00 | 0 | 2 | 1 |
| 0 | 25.08  | 1 | 50 | ant tongue     | 1 | 1 | 0 | 1 | 1   | 0 | 0 | 0 | 0000/00/00 | 0 | 1 | 0 |
| 0 | 44.79  | 1 | 83 | buccal muco    | 1 | 1 | 0 | 2 | 2 x | x | 0 | 0 | 0000/00/00 | 0 | 2 | 0 |
| 0 | 12.33  | 0 | 81 | rmt            | 0 | 0 | 0 | 4 | 4   | 0 | 0 | 0 | 2018/3/24  | 1 | 2 | 0 |
| 0 | 10.03  | 0 | 74 | ant tongue     | 1 | 0 | 0 | 3 | 3 x | x | 0 | 0 | 0000/00/00 | 0 | 2 | 0 |
| 0 | 19.84  | 1 | 53 | ant tongue     | 0 | 0 | 0 | 4 | 2   | 2 | 0 | 0 | 0000/00/00 | 0 | 2 | 1 |
| 0 | 19.41  | 1 | 59 | ant tongue     | 0 | 0 | 0 | 1 | 1 x | x | 0 | 0 | 0000/00/00 | 0 | 2 | 0 |
| 0 | 18.26  | 1 | 71 | ant tongue     | 1 | 1 | 1 | 1 | 1   | 0 | 0 | 0 | 0000/00/00 | 0 | 3 | 0 |
| 0 | 17.77  | 1 | 71 | hard palate    | 0 | 0 | 0 | 4 | 2   | 2 | 0 | 1 | 0000/00/00 | 0 | 3 | 1 |
| 0 | 16.75  | 1 | 54 | ant tongue     | 0 | 0 | 0 | 2 | 2   | 0 | 0 | 0 | 0000/00/00 | 0 | 3 | 0 |
| 0 | 31.38  | 1 | 73 | lip            | 0 | 0 | 0 | 1 | 1   | 0 | 0 | 0 | 0000/00/00 | 0 | 2 | 0 |
| 0 | 16.16  | 1 | 54 | ant tongue     | 0 | 0 | 0 | 1 | 1   | 0 | 0 | 0 | 0000/00/00 | 0 | 2 | 0 |
| 0 | 1.97   | 0 | 81 | alveolar ridgr | 0 | 0 | 0 | 4 | 4   | 0 | 0 | 0 | 0000/00/00 | 0 | 2 | 0 |
| 0 | 15.05  | 1 | 72 | rmt            | 1 | 0 | 0 | 4 | 4   | 0 | 0 | 0 | 0000/00/00 | 0 | 2 | 0 |
| 0 | 3.54   | 0 | 90 | alveolar ridgr | 0 | 0 | 0 | 4 | 4   | 0 | 0 | 0 | 0000/00/00 | 0 | 2 | 0 |
| 0 | 14.46  | 1 | 56 | buccal muco    | 0 | 0 | 0 | 1 | 1 x | x | 0 | 0 | 0000/00/00 | 0 | 2 | 0 |
| 0 | 9.51   | 1 | 75 | ant tongue     | 1 | 0 | 0 | 3 | 3   | 0 | 0 | 0 | 0000/00/00 | 0 | 2 | 0 |
| 0 | 9.31   | 1 | 56 | ant tongue     | 1 | 0 | 0 | 4 | 4   | 3 | 1 | 0 | 2019/5/15  | 1 | 2 | 1 |
| 0 | 9.28   | 1 | 51 | alveolar ridgr | 0 | 0 | 0 | 4 | 4   | 1 | 0 | 0 | 0000/00/00 | 0 | 2 | 1 |
| 0 | 9.02   | 1 | 78 | ant tongue     | 0 | 1 | 0 | 4 | 3   | 2 | 0 | 0 | 0000/00/00 | 0 | 2 | 1 |
| 0 | 8.82   | 1 | 65 | alveolar ridgr | 0 | 0 | 0 | 4 | 4   | 3 | 0 | 0 | 0000/00/00 | 0 | 2 | 1 |
| 0 | 5.41   | 1 | 52 | buccal muco    | 0 | 0 | 0 | 1 | 1 x | x | 0 | 0 | 0000/00/00 | 0 | 2 | 0 |
| 0 | 5.34   | 1 | 57 | ant tongue     | 0 | 0 | 0 | 1 | 1   | 0 | 0 | 0 | 0000/00/00 | 0 | 2 | 0 |
| 1 | 17.54  | 0 | 44 | buccal mucosa  |   |   |   | 4 | 4   | 2 | 1 | 0 | 0000/00/00 | 0 | 3 | 1 |
| 1 | 99.44  | 0 | 59 | ant tongue     |   |   |   | 2 | 2   | 0 | 0 | 0 | 0000/00/00 | 0 | 2 | 0 |
| 1 | 135.31 | 1 | 38 | rmt            |   |   |   | 1 | 1   | 0 | 0 | 0 | 2012/6/7   | 1 | 2 | 0 |
| 1 | 18.36  | 0 | 59 | rmt            |   |   |   | 4 | 4   | 0 | 0 | 0 | 2009/5/15  | 1 | 2 | 0 |
| 1 | 118.85 | 0 | 46 | ant tongue     | 1 | 1 | 1 | 1 | 1   | 0 | 0 | 0 | 2010/11/26 | 1 | 2 | 0 |
| 1 | 47.18  | 0 | 49 | buccal mucosa  |   |   |   | 1 | 1   | 0 | 0 | 0 | 2008/10/1  | 1 | 2 | 0 |
| 1 | 52.10  | 0 | 51 | ant tongue     |   |   |   | 4 | 4   | 2 | 1 | 0 | 0000/00/00 | 0 | 2 | 1 |
| 1 | 55.38  | 0 | 65 | ant tongue     |   |   |   | 4 | 4   | 0 | 0 | 0 | 0000/00/00 | 0 | 1 | 0 |
| 1 | 18.59  | 0 | 39 | buccal mucosa  |   |   |   | 4 | 4   | 2 | 1 | 0 | 0000/00/00 | 0 | 2 | 1 |
| 1 | 20.98  | 0 | 35 | ant tongue     |   |   |   | 3 | 2   | 1 | 1 | 0 | 2009/4/21  | 1 | 3 | 1 |
| 1 | 116.98 | 0 | 59 | alveolar ridge |   |   |   | 4 | 4   | 2 | 0 | 0 | 2010/12/25 | 1 | 2 | 1 |
| 1 | 71.02  | 0 | 39 | rmt            |   |   |   | 1 | 1   | 0 | 0 | 0 | 2013/1/21  | 1 | 2 | 0 |
| 1 | 42.62  | 0 | 68 | ant tongue     |   |   |   | 1 | 1   | 0 | 0 | 0 | 0000/00/00 | 0 | 2 | 0 |
| 1 | 5.08   | 0 | 34 | buccal mucosa  |   |   |   | 4 | 4   | 0 | 1 | 0 | 0000/00/00 | 0 | 2 | 0 |
| 1 | 16.10  | 0 | 43 | ant tongue     |   |   |   | 4 | 4   | 0 | 0 | 0 | 2009/1/14  | 1 | 1 | 0 |
| 1 | 20.13  | 0 | 35 | buccal mucosa  |   |   |   | 2 | 2   | 0 | 0 | 0 | 0000/00/00 | 0 | 2 | 0 |
| 1 | 51.38  | 0 | 61 | ant tongue     |   |   |   | 2 | 2   | 0 | 0 | 0 | 0000/00/00 | 0 | 2 | 0 |
| 1 | 122.26 | 0 | 60 | buccal mucosa  |   |   |   | 4 | 4   | 2 | 1 | 0 | 0000/00/00 | 0 | 2 | 1 |
| 1 | 56.39  | 0 | 28 | ant tongue     |   |   |   | 2 | 2   | 0 | 0 | 0 | 2010/12/8  | 1 | 2 | 0 |
| 1 | 89.41  | 0 | 61 | buccal mucosa  |   |   |   | 4 | 2   | 2 | 0 | 0 | 0000/00/00 | 0 | 2 | 1 |
| 1 | 132.26 | 1 | 46 | rmt            |   |   |   | 3 | 1   | 1 | 0 | 0 | 0000/00/00 | 0 | 2 | 1 |
| 1 | 11.70  | 0 | 46 | buccal mucosa  |   |   |   | 4 | 4   | 1 | 1 | 0 | 0000/00/00 | 0 | 2 | 1 |
| 1 | 10.52  | 0 | 75 | ant tongue     |   |   |   | 4 | 4   | 2 | 1 | 0 | 2008/12/26 | 1 | 2 | 1 |
| 1 | 11.31  | 0 | 27 | buccal mucosa  |   |   |   | 2 | 2   | 0 | 0 | 0 | 2008/11/26 | 1 | 2 | 0 |

|   |        |   |    |                |    |   |   |   |   |   |            |   |   |   |
|---|--------|---|----|----------------|----|---|---|---|---|---|------------|---|---|---|
| 1 | 37.57  | 0 | 73 | buccal mucosa  | 無法 | 4 | x | x |   | 1 | 0000/00/00 | 0 | 1 |   |
| 1 | 35.31  | 0 | 56 | buccal mucosa  |    | 4 | 4 | 0 | 0 | 0 | 0000/00/00 | 0 | 2 | 0 |
| 1 | 34.33  | 0 | 71 | alveolar ridge |    | 2 | 2 | 0 | 0 | 0 | 0000/00/00 | 0 | 3 | 0 |
| 1 | 42.82  | 0 | 42 | ant tongue     |    | 4 | 3 | 2 | 1 | 0 | 0000/00/00 | 0 | 2 | 1 |
| 1 | 38.66  | 0 | 67 | ant tongue     | 無法 |   | 1 | x | x | 0 | 0000/00/00 | 0 | 2 | 0 |
| 1 | 132.03 | 1 | 72 | buccal mucosa  |    | 2 | 2 | 0 | 0 | 0 | 2012/2/14  | 1 | 1 | 0 |
| 1 | 7.90   | 0 | 41 | rmt            |    | 4 | 4 | 0 | 0 | 0 | 2009/1/30  | 1 | 2 | 0 |
| 1 | 20.26  | 0 | 49 | ant tongue     |    | 4 | 2 | 2 | 1 | 0 | 2009/2/25  | 1 | 2 | 1 |
| 1 | 58.52  | 0 | 56 | alveolar ridge |    | 1 | 1 | 0 | 0 | 0 | 2010/7/23  | 1 | 2 | 0 |
| 1 | 37.57  | 0 | 63 | alveolar ridge |    | 4 | 1 | 2 | 0 | 0 | 0000/00/00 | 0 | 2 | 1 |
| 1 | 130.49 | 1 | 69 | lip            |    | 1 | 1 | 0 | 0 | 0 | 0000/00/00 | 0 | 2 | 0 |
| 1 | 61.61  | 0 | 43 | alveolar ridge |    | 4 | 4 | 0 | 0 | 0 | 0000/00/00 | 0 | 2 | 0 |
| 1 | 126.16 | 0 | 49 | ant tongue     |    | 1 | 1 | 0 | 0 | 0 | 0000/00/00 | 0 | 2 | 0 |
| 1 | 118.75 | 0 | 50 | buccal mucosa  |    | 4 | 4 | 0 | 0 | 0 | 2012/3/7   | 1 | 2 | 0 |
| 1 | 15.31  | 0 | 37 | ant tongue     | 無法 |   | 1 | x | x | 0 | 0000/00/00 | 0 | 2 | 0 |
| 1 | 66.23  | 0 | 48 | alveolar ridge | 無法 |   | 4 | x | x | 0 | 0000/00/00 | 0 | 2 | 0 |
| 1 | 125.77 | 0 | 64 | ant tongue     |    | 3 | 1 | 1 | 0 | 0 | 0000/00/00 | 0 | 2 | 1 |
| 1 | 61.02  | 0 | 61 | ant tongue     |    | 1 | 1 | 0 | 0 | 0 | 2012/5/29  | 1 | 2 | 0 |
| 1 | 11.25  | 0 | 59 | alveolar ridge |    | 4 | 4 | 2 | 1 | 0 | 2009/2/21  | 1 | 2 | 1 |
| 1 | 54.72  | 0 | 53 | buccal mucosa  | 無法 |   | 1 | x | x | 0 | 2012/10/2  | 1 | 1 |   |
| 1 | 12.59  | 0 | 45 | buccal mucosa  |    | 4 | 3 | 2 | 1 | 0 | 0000/00/00 | 0 | 3 | 1 |
| 1 | 12.10  | 0 | 59 | mouth floor    |    | 1 | 1 | 0 | 0 | 0 | 0000/00/00 | 0 | 2 | 0 |
| 1 | 11.44  | 0 | 52 | hard palate    |    | 4 | 4 | 1 | 0 | 0 | 0000/00/00 | 0 | 2 | 1 |
| 1 | 15.54  | 0 | 41 | buccal mucosa  | 無法 |   | 1 | x | x | 0 | 2009/5/25  | 1 | 2 |   |
| 1 | 8.46   | 0 | 43 | rmt            | 無法 |   | 3 | x | x | 0 | 0000/00/00 | 0 | 3 |   |
| 1 | 20.16  | 0 | 35 | ant tongue     |    | 2 | 2 | 0 | 0 | 0 | 2009/9/19  | 1 | 2 | 0 |
| 1 | 40.10  | 0 | 59 | buccal mucosa  |    | 2 | 2 | 0 | 0 | 0 | 0000/00/00 | 0 | 2 | 0 |
| 1 | 44.07  | 0 | 60 | ant tongue     |    | 4 | 4 | 2 | 1 | 0 | 0000/00/00 | 0 | 2 | 1 |
| 1 | 20.30  | 0 | 48 | alveolar ridge |    | 4 | 4 | 2 | 1 | 1 | 2010/4/7   | 1 | 3 | 1 |
| 1 | 44.23  | 0 | 51 | buccal mucosa  |    | 2 | 2 | 0 | 0 | 0 | 0000/00/00 | 0 | 2 | 0 |
| 1 | 13.80  | 0 | 51 | ant tongue     | 無法 |   | 2 | x | 0 | 0 | 2009/6/27  | 1 | 2 |   |
| 1 | 53.38  | 0 | 46 | buccal mucosa  |    | 3 | 3 | 0 | 0 | 0 | 0000/00/00 | 0 | 2 | 0 |
| 1 | 95.28  | 0 | 59 | ant tongue     |    | 1 | 1 | 0 | 0 | 0 | 0000/00/00 | 0 | 2 | 0 |
| 1 | 115.87 | 0 | 59 | buccal mucosa  |    | 4 | 4 | 1 | 1 | 0 | 0000/00/00 | 0 | 2 | 1 |
| 1 | 29.61  | 0 | 53 | alveolar ridge |    | 4 | 4 | 2 | 1 | 0 | 0000/00/00 | 0 | 2 | 1 |
| 1 | 128.82 | 1 | 36 | buccal mucosa  |    | 1 | 1 | 0 | 0 | 0 | 0000/00/00 | 0 | 2 | 0 |
| 1 | 6.62   | 0 | 48 | ant tongue     |    | 4 | 4 | 2 | 1 | 1 | 0000/00/00 | 0 | 3 | 1 |
| 1 | 80.26  | 0 | 64 | ant tongue     |    | 4 | 4 | 1 | 0 | 1 | 0000/00/00 | 0 | 2 | 1 |
| 1 | 105.90 | 0 | 46 | buccal mucosa  |    | 1 | 1 | 0 | 0 | 0 | 0000/00/00 | 0 | 2 | 0 |
| 1 | 71.70  | 0 | 48 | lip            |    | 2 | 2 | 0 | 0 | 0 | 0000/00/00 | 0 | 2 | 0 |
| 1 | 56.92  | 0 | 70 | buccal mucosa  | 無法 |   | 1 | x | 0 | 0 | 2010/5/3   | 1 | 2 |   |
| 1 | 23.80  | 0 | 46 | buccal mucosa  |    | 4 | 3 | 2 | 1 | 0 | 0000/00/00 | 0 | 2 | 1 |
| 1 | 19.67  | 0 | 52 | lip            | 無法 |   | 1 | x | 0 | 0 | 2009/7/17  | 1 | 2 |   |
| 1 | 125.21 | 1 | 46 | buccal mucosa  |    | 4 | 4 | 1 | 1 | 0 | 0000/00/00 | 0 | 2 | 1 |
| 1 | 122.62 | 0 | 72 | buccal mucosa  |    | 1 | 1 | 0 | 0 | 0 | 0000/00/00 | 0 | 1 | 0 |
| 1 | 65.05  | 0 | 36 | buccal mucosa  |    | 4 | 4 | 1 | 0 | 0 | 0000/00/00 | 0 | 2 | 1 |
| 1 | 30.49  | 0 | 78 | alveolar ridge | 無法 |   | 2 | x | x | 0 | 0000/00/00 | 0 | 1 |   |
| 1 | 12.10  | 0 | 42 | ant tongue     |    | 4 | 3 | 2 | 1 | 0 | 2009/4/3   | 1 | 2 | 1 |
| 1 | 123.61 | 1 | 51 | ant tongue     |    | 1 | 1 | 0 | 0 | 0 | 0000/00/00 | 0 | 2 | 0 |
| 1 | 122.89 | 1 | 64 | buccal mucosa  | 0  | 0 | 0 | 0 | 0 | 0 | 0000/00/00 | 0 | 2 | 0 |
| 1 | 24.62  | 0 | 60 | ant tongue     |    | 2 | 2 | 0 | 0 | 0 | 0000/00/00 | 0 | 2 | 0 |
| 1 | 122.66 | 1 | 61 | ant tongue     |    | 3 | 1 | 1 | 0 | 0 | 0000/00/00 | 0 | 1 | 1 |
| 1 | 37.11  | 0 | 67 | rmt            |    | 4 | 4 | 0 | 0 | 0 | 0000/00/00 | 0 | 2 | 0 |
| 1 | 8.46   | 0 | 50 | ant tongue     |    | 4 | 4 | 2 | 1 | 0 | 0000/00/00 | 0 | 2 | 1 |
| 1 | 121.90 | 1 | 61 | mouth floor    |    | 4 | 4 | 0 | 0 | 0 | 0000/00/00 | 0 | 2 | 0 |
| 1 | 122.00 | 1 | 44 | buccal mucosa  |    | 4 | 4 | 0 | 0 | 0 | 0000/00/00 | 0 | 1 | 0 |
| 1 | 121.74 | 1 | 46 | buccal mucosa  |    | 4 | 4 | 0 | 0 | 0 | 0000/00/00 | 0 | 1 | 0 |
| 1 | 60.16  | 0 | 76 | ant tongue     |    | 2 | 2 | 0 | 0 | 0 | 0000/00/00 | 0 | 2 | 0 |
| 1 | 33.90  | 0 | 75 | lip            | 無法 |   | 2 | x | x | 0 | 2010/4/19  | 1 | 2 |   |
| 1 | 22.89  | 0 | 62 | alveolar ridge |    | 4 | 4 | 0 | 0 | 0 | 0000/00/00 | 0 | 1 | 0 |
| 1 | 41.05  | 0 | 64 | ant tongue     |    | 2 | 2 | 0 | 0 | 0 | 2012/4/13  | 1 | 2 | 0 |
| 1 | 18.23  | 0 | 85 | ant tongue     |    | 2 | 2 | 0 | 0 | 0 | 2010/6/12  | 1 | 2 | 0 |
| 1 | 51.28  | 0 | 50 | buccal mucosa  |    | 1 | 1 | 0 | 0 | 0 | 0000/00/00 | 0 | 1 | 0 |
| 1 | 120.43 | 1 | 47 | buccal mucosa  |    | 1 | 1 | 0 | 0 | 0 | 0000/00/00 | 0 | 1 | 0 |
| 1 | 40.10  | 0 | 59 | hard palate    |    | 2 | 2 | 0 | 0 | 0 | 0000/00/00 | 0 | 2 | 0 |
| 1 | 119.25 | 1 | 53 | ant tongue     |    | 4 | 4 | 1 | 0 | 0 | 0000/00/00 | 0 | 2 | 1 |
| 1 | 120.16 | 1 | 65 | lip            |    | 1 | 1 | 0 | 0 | 0 | 0000/00/00 | 0 | 2 | 0 |
| 1 | 20.20  | 0 | 46 | alveolar ridge |    | 4 | 4 | 0 | 0 | 0 | 0000/00/00 | 0 | 2 | 0 |
| 1 | 118.75 | 1 | 59 | ant tongue     |    | 4 | 4 | 0 | 0 | 0 | 0000/00/00 | 0 | 2 | 0 |
| 1 | 17.02  | 0 | 66 | ant tongue     |    | 2 | 2 | 0 | 0 | 0 | 0000/00/00 | 0 | 2 | 0 |
| 1 | 46.82  | 0 | 60 | buccal mucosa  | 無法 |   | 2 | x | x | 0 | 0000/00/00 | 0 | 1 |   |

|   |        |   |    |                |   |   |   |   |   |             |   |   |   |
|---|--------|---|----|----------------|---|---|---|---|---|-------------|---|---|---|
| 1 | 58.20  | 0 | 69 | ant tongue     | 2 | 2 | 0 | 0 | 0 | 0000/00/00  | 0 | 2 | 0 |
| 1 | 118.59 | 1 | 45 | rmt            | 4 | 4 | 0 | 0 | 0 | 0000/00/00  | 0 | 2 | 0 |
| 1 | 118.43 | 1 | 42 | lip            | 3 | 3 | 0 | 0 | 0 | 0000/00/00  | 0 | 2 | 0 |
| 1 | 118.72 | 1 | 57 | buccal mucosa  | 4 | 4 | 0 | 0 | 0 | 0000/00/00  | 0 | 2 | 0 |
| 1 | 117.57 | 1 | 43 | alveolar ridge | 4 | 4 | 0 | 0 | 0 | 0000/00/00  | 0 | 2 | 0 |
| 1 | 117.44 | 1 | 45 | buccal mucosa  | 4 | 4 | 1 | 0 | 0 | 0000/00/00  | 0 | 2 | 1 |
| 1 | 116.72 | 1 | 46 | buccal mucosa  | 2 | 2 | 0 | 0 | 0 | 0000/00/00  | 0 | 2 | 0 |
| 1 | 15.64  | 0 | 53 | hard palate    | 4 | 4 | 0 | 0 | 0 | 2010/4/25   | 1 | 2 | 0 |
| 1 | 56.39  | 0 | 43 | ant tongue     | 4 | 4 | 2 | 0 | 0 | 0000/00/00  | 0 | 2 | 1 |
| 1 | 22.43  | 0 | 35 | mouth floor    | 3 | 1 | 1 | 0 | 0 | 2010/11/12  | 1 | 2 | 1 |
| 1 | 19.77  | 0 | 42 | ant tongue     | 4 | 4 | 2 | 0 | 0 | 0000/00/00  | 0 | 3 | 1 |
| 1 | 115.28 | 1 | 58 | buccal mucosa  | 4 | 4 | 0 | 0 | 0 | 0000/00/00  | 0 | 2 | 0 |
| 1 | 88.33  | 0 | 38 | ant tongue     | 3 | 2 | 1 | 0 | 0 | 0000/00/00  | 0 | 2 | 1 |
| 1 | 12.39  | 0 | 57 | lip            | 1 | 1 | 0 | 0 | 0 | 0000/00/00  | 0 | 2 | 0 |
| 1 | 12.82  | 0 | 41 | rmt            | 4 | 4 | 0 | 0 | 0 | 2010/6/14   | 1 | 2 | 0 |
| 1 | 113.93 | 1 | 29 | buccal muco    | 2 | 2 | 0 | 0 | 0 | 0000/00/00  | 0 | 2 | 0 |
| 1 | 113.90 | 1 | 58 | buccal mucosa  | 3 | 1 | 1 | 0 | 0 | 0000/00/00  | 0 | 2 | 1 |
| 1 | 49.02  | 0 | 37 | buccal mucosa  | 2 | 2 | 0 | 0 | 0 | 2010/11/29  | 1 | 1 | 0 |
| 1 | 40.66  | 0 | 56 | rmt            | 2 | 2 | 0 | 0 | 0 | 2010/11/3   | 1 | 2 | 0 |
| 1 | 21.11  | 0 | 45 | buccal mucosa  | 4 | 4 | 2 | 0 | 0 | 2011/8/4    | 1 | 2 | 1 |
| 1 | 13.87  | 0 | 56 | mouth floor    | 4 | 4 | 2 | 0 | 0 | 0000/00/00  | 0 | 1 | 1 |
| 1 | 113.15 | 1 | 52 | buccal mucosa  | 1 | 1 | 0 | 0 | 0 | 10000/00/00 | 0 | 2 | 0 |
| 1 | 12.92  | 0 | 54 | ant tongue     | 2 | 2 | 0 | 0 | 0 | 0000/00/00  | 0 | 1 | 0 |
| 1 | 24.89  | 0 | 55 | buccal mucosa  | 2 | 2 | 0 | 0 | 0 | 0000/00/00  | 0 | 2 | 0 |
| 1 | 71.70  | 0 | 82 | buccal mucosa  | 4 | 1 | 2 | 0 | 0 | 10000/00/00 | 0 | 2 | 1 |
| 1 | 112.75 | 1 | 50 | buccal mucosa  | 2 | 2 | 0 | 0 | 0 | 0000/00/00  | 0 | 2 | 0 |
| 1 | 53.08  | 0 | 41 | rmt            | 1 | 1 | 0 | 0 | 0 | 0000/00/00  | 0 | 2 | 0 |
| 1 | 112.59 | 1 | 49 | mouth floor    | 4 | 4 | 1 | 0 | 0 | 0000/00/00  | 0 | 2 | 1 |
| 1 | 112.52 | 1 | 58 | buccal mucosa  | 1 | 1 | 0 | 0 | 0 | 0000/00/00  | 0 | 1 | 0 |
| 1 | 38.72  | 0 | 56 | ant tongue     | 1 | 1 | 0 | 0 | 0 | 0000/00/00  | 0 | 2 | 0 |
| 1 | 112.46 | 1 | 52 | rmt            | 4 | 2 | 2 | 0 | 0 | 0000/00/00  | 0 | 2 | 1 |
| 1 | 28.20  | 0 | 49 | ant tongue     | 3 | 1 | 1 | 0 | 0 | 2010/12/7   | 1 | 2 | 1 |
| 1 | 112.36 | 1 | 55 | buccal mucosa  | 1 | 1 | 0 | 0 | 0 | 10000/00/00 | 0 | 2 | 0 |
| 1 | 58.62  | 0 | 70 | buccal mucosa  | 4 | 4 | 0 | 0 | 0 | 0000/00/00  | 0 | 2 | 0 |
| 1 | 112.13 | 1 | 66 | alveolar ridge | 4 | 4 | 0 | 0 | 0 | 0000/00/00  | 0 | 2 | 0 |
| 1 | 49.34  | 0 | 63 | alveolar ridge | 4 | 4 | x | x | 0 | 2011/12/30  | 1 | 1 | 0 |
| 1 | 52.43  | 0 | 54 | rmt            | 4 | 4 | 0 | 0 | 0 | 0000/00/00  | 0 | 2 | 0 |
| 1 | 84.49  | 0 | 66 | alveolar ridge | 1 | 1 | 0 | 0 | 0 | 0000/00/00  | 0 | 2 | 0 |
| 1 | 111.90 | 1 | 58 | rmt            | 4 | 4 | 0 | 0 | 0 | 0000/00/00  | 0 | 2 | 0 |
| 1 | 20.75  | 0 | 62 | buccal mucosa  | 2 | 2 | 0 | 0 | 0 | 0000/00/00  | 0 | 2 | 0 |
| 1 | 57.31  | 0 | 53 | mouth floor    | 2 | 2 | 0 | 0 | 0 | 0000/00/00  | 0 | 2 | 0 |
| 1 | 1.84   | 0 | 61 | ant tongue     | 4 | 3 | 3 | 1 | 0 | 0000/00/00  | 0 | 2 | 1 |
| 1 | 44.20  | 0 | 76 | ant tongue     | 2 | 2 | 0 | 0 | 0 | 2013/10/26  | 1 | 2 | 0 |
| 1 | 88.10  | 0 | 74 | rmt            | 4 | 4 | 0 | 0 | 0 | 0000/00/00  | 0 | 2 | 0 |
| 1 | 112.39 | 1 | 46 | buccal mucosa  | 3 | 2 | 1 | 0 | 0 | 0000/00/00  | 0 | 2 | 1 |
| 1 | 28.62  | 0 | 67 | buccal mucosa  | 1 | 1 | 0 | 0 | 0 | 0000/00/00  | 0 | 2 | 0 |
| 1 | 111.84 | 1 | 56 | buccal mucosa  | 2 | 2 | 0 | 0 | 0 | 0000/00/00  | 0 | 2 | 0 |
| 1 | 110.89 | 1 | 46 | alveolar ridge | 4 | 4 | 2 | 0 | 0 | 0000/00/00  | 0 | 2 | 1 |
| 1 | 110.92 | 1 | 73 | ant tongue     | 2 | 2 | 0 | 0 | 0 | 0000/00/00  | 0 | 2 | 0 |
| 1 | 17.77  | 0 | 66 | ant tongue     | 4 | 4 | 2 | 0 | 0 | 0000/00/00  | 0 | 2 | 1 |
| 1 | 100.89 | 0 | 62 | lip            | 2 | 2 | 0 | 0 | 0 | 0000/00/00  | 0 | 2 | 0 |
| 1 | 81.02  | 0 | 48 | mouth floor    | 1 | 1 | 0 | 0 | 0 | 2014/1/12   | 1 | 2 | 0 |
| 1 | 110.82 | 1 | 44 | buccal mucosa  | 1 | 1 | x | x | 0 | 0000/00/00  | 0 | 1 | 0 |
| 1 | 110.79 | 1 | 53 | ant tongue     | 1 | 1 | 0 | 0 | 0 | 0000/00/00  | 0 | 1 | 0 |
| 1 | 31.28  | 0 | 54 | alveolar ridge | 1 | 1 | 0 | 0 | 0 | 0000/00/00  | 0 | 2 | 0 |
| 1 | 77.08  | 0 | 74 | alveolar ridge | 4 | 4 | 0 | 0 | 0 | 0000/00/00  | 0 | 2 | 0 |
| 1 | 19.97  | 0 | 84 | rmt            | 4 | 4 | 0 | 0 | 0 | 2011/1/31   | 1 | 2 | 0 |
| 1 | 110.62 | 1 | 37 | ant tongue     | 1 | 1 | 0 | 0 | 0 | 0000/00/00  | 0 | 2 | 0 |
| 1 | 110.72 | 1 | 52 | buccal mucosa  | 1 | 1 | 0 | 0 | 0 | 0000/00/00  | 0 | 2 | 0 |
| 1 | 110.62 | 1 | 49 | buccal mucosa  | 4 | 1 | 2 | 0 | 0 | 0000/00/00  | 0 | 2 | 1 |
| 1 | 112.62 | 1 | 72 | buccal mucosa  | 3 | 3 | 0 | 0 | 0 | 0000/00/00  | 0 | 1 | 0 |
| 1 | 110.43 | 1 | 45 | buccal mucosa  | 4 | 4 | 2 | 0 | 0 | 0000/00/00  | 0 | 2 | 1 |
| 1 | 110.43 | 1 | 47 | buccal mucosa  | 1 | 1 | 0 | 0 | 0 | 0000/00/00  | 0 | 2 | 0 |
| 1 | 10.95  | 0 | 60 | alveolar ridge | 4 | 4 | 2 | 0 | 0 | 2010/10/9   | 1 | 2 | 1 |
| 1 | 110.66 | 1 | 64 | buccal mucosa  | 1 | 1 | 0 | 0 | 0 | 0000/00/00  | 0 | 2 | 0 |
| 1 | 39.87  | 0 | 57 | buccal mucosa  | 2 | 2 | 0 | 0 | 0 | 0000/00/00  | 0 | 1 | 0 |
| 1 | 10.79  | 0 | 57 | hard palate    | 4 | 4 | x | x | 0 | 2010/11/20  | 1 | 2 | 0 |
| 1 | 55.31  | 0 | 51 | mouth floor    | 1 | 1 | 0 | 0 | 0 | 2013/11/27  | 1 | 2 | 0 |
| 1 | 110.03 | 1 | 71 | buccal mucosa  | 2 | 2 | 0 | 0 | 0 | 0000/00/00  | 0 | 2 | 0 |
| 1 | 111.15 | 1 | 42 | buccal mucosa  | 1 | 1 | 0 | 0 | 0 | 0000/00/00  | 0 | 1 | 0 |
| 1 | 51.05  | 0 | 50 | hard palate    | 4 | 4 | x | x | 0 | 0000/00/00  | 0 | 2 | 0 |
| 1 | 110.07 | 1 | 62 | buccal mucosa  | 1 | 1 | 0 | 0 | 0 | 0000/00/00  | 0 | 2 | 0 |

|   |        |   |                   |    |   |   |   |   |            |   |   |   |
|---|--------|---|-------------------|----|---|---|---|---|------------|---|---|---|
| 1 | 109.57 | 1 | 53 lip            | 4  | 2 | 2 | 0 | 1 | 0000/00/00 | 0 | 2 | 1 |
| 1 | 109.57 | 1 | 45 buccal mucosa  | 2  | 2 | 0 | 0 | 0 | 2010/12/2  | 1 | 2 | 0 |
| 1 | 110.03 | 1 | 57 rmt            | 1  | 1 | 0 | 0 | 0 | 2013/10/29 | 1 | 2 | 0 |
| 1 | 109.51 | 1 | 58 lip            | 1  | 1 | 0 | 0 | 0 | 0000/00/00 | 0 | 2 | 0 |
| 1 | 110.33 | 1 | 53 lip            | 4  | 2 | 2 | 0 | 0 | 0000/00/00 | 0 | 2 | 1 |
| 1 | 109.34 | 1 | 43 buccal mucosa  | 1  | 1 | 0 | 0 | 0 | 0000/00/00 | 0 | 2 | 0 |
| 1 | 109.77 | 1 | 40 buccal mucosa  | 1  | 1 | 0 | 0 | 0 | 0000/00/00 | 0 | 1 | 0 |
| 1 | 109.18 | 1 | 55 lip            | 2  | 2 | 0 | 0 | 0 | 0000/00/00 | 0 | 1 | 0 |
| 1 | 109.18 | 1 | 67 ant tongue     | 2  | 2 | 0 | 0 | 0 | 0000/00/00 | 0 | 2 | 0 |
| 1 | 31.02  | 0 | 55 buccal mucosa  | 3  | 1 | 1 | 0 | 0 | 0000/00/00 | 0 | 2 | 1 |
| 1 | 51.28  | 0 | 69 lip            | 1  | 1 | x | x | 0 | 0000/00/00 | 0 | 1 |   |
| 1 | 110.75 | 1 | 42 ant tongue     | 4  | 2 | 2 | 0 | 0 | 0000/00/00 | 0 | 2 | 1 |
| 1 | 109.11 | 1 | 62 buccal mucosa  | 4  | 4 | 0 | 0 | 0 | 0000/00/00 | 0 | 3 | 0 |
| 1 | 85.34  | 0 | 61 alveolar ridge | 4  | 4 | 0 | 0 | 0 | 0000/00/00 | 0 | 2 | 0 |
| 1 | 18.85  | 0 | 57 rmt            | 4  | 1 | 2 | 0 | 0 | 2010/12/16 | 1 | 2 | 1 |
| 1 | 15.31  | 0 | 46 ant tongue     | 1  | 1 | x | x | 0 | 2011/4/29  | 1 | 2 |   |
| 1 | 108.66 | 1 | 41 ant tongue     | 3  | 2 | 1 | 0 | 0 | 0000/00/00 | 0 | 3 | 1 |
| 1 | 108.59 | 1 | 58 ant tongue     | 1  | 1 | 0 | 0 | 0 | 0000/00/00 | 0 | 2 | 0 |
| 1 | 91.80  | 0 | 61 hard palate    | 1  | 1 | x | x | 0 | 2010/12/25 | 1 | 2 |   |
| 1 | 108.59 | 1 | 61 rmt            | 1  | 1 | 0 | 0 | 0 | 2014/2/14  | 1 | 2 | 0 |
| 1 | 108.66 | 1 | 42 alveolar ridge | 4  | 4 | 0 | 0 | 0 | 0000/00/00 | 0 | 2 | 0 |
| 1 | 108.69 | 1 | 68 lip            | 2  | 2 | 0 | 0 | 0 | 0000/00/00 | 0 | 1 | 0 |
| 1 | 109.11 | 1 | 56 lip            | 4  | 4 | x | x | 0 | 0000/00/00 | 0 | 3 |   |
| 1 | 108.46 | 1 | 60 buccal mucosa  | 1  | 1 | 0 | 0 | 0 | 2013/9/25  | 1 | 2 | 0 |
| 1 | 109.31 | 1 | 64 buccal mucosa  | 3  | 1 | 1 | 0 | 0 | 0000/00/00 | 0 | 3 | 1 |
| 1 | 109.11 | 1 | 54 alveolar ridge | 2  | 2 | 0 | 0 | 0 | 0000/00/00 | 0 | 1 | 0 |
| 1 | 108.26 | 1 | 72 buccal mucosa  | 1  | 1 | 0 | 0 | 0 | 0000/00/00 | 0 | 2 | 0 |
| 1 | 108.03 | 1 | 53 buccal mucosa  | 1  | 1 | x | x | 0 | 2011/2/21  | 1 | 1 |   |
| 1 | 21.38  | 0 | 75 buccal mucosa  | 4  | 4 | 2 | 1 | 0 | 0000/00/00 | 0 | 2 | 1 |
| 1 | 108.69 | 1 | 67 buccal mucosa  | 無法 | 2 | x | x | 0 | 2012/5/29  | 1 | 2 |   |
| 1 | 108.20 | 1 | 35 ant tongue     | 4  | 2 | 2 | 0 | 0 | 0000/00/00 | 0 | 1 | 1 |
| 1 | 63.87  | 0 | 61 buccal mucosa  | 2  | 2 | 0 | 0 | 0 | 0000/00/00 | 0 | 2 | 0 |
| 1 | 24.46  | 0 | 72 mouth floor    | 1  | 1 | 0 | 0 | 0 | 0000/00/00 | 0 | 2 | 0 |
| 1 | 12.33  | 0 | 75 rmt            | 2  | 2 | x | x | 0 | 2010/9/8   | 1 | 3 |   |
| 1 | 49.15  | 0 | 73 buccal mucosa  | 4  | 1 | 2 | 0 | 0 | 0000/00/00 | 0 | 2 | 1 |
| 1 | 35.61  | 0 | 57 buccal mucosa  | 1  | 1 | 0 | 0 | 0 | 2012/5/6   | 1 | 2 | 0 |
| 1 | 108.62 | 1 | 49 alveolar ridge | 1  | 1 | 0 | 0 | 0 | 0000/00/00 | 0 | 2 | 0 |
| 1 | 107.93 | 1 | 69 buccal mucosa  | 1  | 1 | 0 | 0 | 0 | 2014/8/5   | 1 | 1 | 0 |
| 1 | 107.05 | 1 | 52 buccal mucosa  | 1  | 1 | 0 | 0 | 0 | 0000/00/00 | 0 | 2 | 0 |
| 1 | 107.05 | 1 | 54 ant tongue     | 1  | 1 | 0 | 0 | 0 | 0000/00/00 | 0 | 2 | 0 |
| 1 | 107.11 | 1 | 67 buccal mucosa  | 2  | 2 | x | x | 0 | 0000/00/00 | 0 | 1 |   |
| 1 | 106.82 | 1 | 46 buccal mucosa  | 1  | 1 | 0 | 0 | 0 | 0000/00/00 | 0 | 2 | 0 |
| 1 | 38.92  | 0 | 59 buccal mucosa  | 1  | 1 | x | x | 0 | 2012/4/21  | 1 | 2 |   |
| 1 | 109.84 | 1 | 51 buccal mucosa  | 1  | 1 | 0 | 0 | 0 | 0000/00/00 | 0 | 2 | 0 |
| 1 | 106.72 | 1 | 55 mouth floor    | 1  | 1 | 0 | 0 | 0 | 0000/00/00 | 0 | 2 | 0 |
| 1 | 106.79 | 1 | 32 ant tongue     | 1  | 1 | 0 | 0 | 0 | 0000/00/00 | 0 | 2 | 0 |
| 1 | 104.36 | 0 | 76 buccal mucosa  | 1  | 1 | x | x | 0 | 0000/00/00 | 0 | 1 |   |
| 1 | 106.59 | 1 | 60 ant tongue     | 4  | 4 | 0 | 0 | 0 | 0000/00/00 | 0 | 2 | 0 |
| 1 | 109.34 | 1 | 48 buccal mucosa  | 1  | 1 | 0 | 0 | 0 | 0000/00/00 | 0 | 2 | 0 |
| 1 | 75.48  | 0 | 49 buccal mucosa  | 1  | 1 | 0 | 0 | 0 | 0000/00/00 | 0 | 2 | 0 |
| 1 | 106.52 | 1 | 50 alveolar ridge | 4  | 4 | 1 | 0 | 0 | 0000/00/00 | 0 | 2 | 1 |
| 1 | 106.33 | 1 | 46 buccal mucosa  | 1  | 1 | 0 | 0 | 0 | 0000/00/00 | 0 | 2 | 0 |
| 1 | 106.13 | 1 | 58 buccal mucosa  | 1  | 1 | 0 | 0 | 0 | 2013/10/2  | 1 | 2 | 0 |
| 1 | 20.30  | 0 | 39 buccal mucosa  | 4  | 2 | 2 | 0 | 0 | 2012/3/3   | 1 | 2 | 1 |
| 1 | 106.52 | 1 | 61 buccal mucosa  | 1  | 1 | 0 | 0 | 0 | 0000/00/00 | 0 | 1 | 0 |
| 1 | 105.90 | 1 | 44 alveolar ridge | 2  | 2 | 0 | 0 | 0 | 0000/00/00 | 0 | 2 | 0 |
| 1 | 105.57 | 1 | 40 alveolar ridge | 1  | 1 | x | x | 0 | 0000/00/00 | 0 | 2 |   |
| 1 | 106.33 | 1 | 54 hard palate    | 4  | 4 | 0 | 0 | 0 | 0000/00/00 | 0 | 1 | 0 |
| 1 | 7.41   | 0 | 80 alveolar ridge | 4  | 4 | 2 | 0 | 0 | 0000/00/00 | 0 | 2 | 1 |
| 1 | 105.64 | 1 | 56 rmt            | 1  | 1 | x | x | 0 | 0000/00/00 | 0 | 1 |   |
| 1 | 70.75  | 0 | 44 ant tongue     | 無法 | 1 | x | x | 0 | 0000/00/00 | 0 | 1 |   |
| 1 | 15.11  | 0 | 58 ant tongue     | 3  | 3 | 0 | 0 | 0 | 0000/00/00 | 0 | 2 | 0 |
| 1 | 78.30  | 0 | 59 ant tongue     | 3  | 3 | 1 | 0 | 0 | 0000/00/00 | 0 | 2 | 1 |
| 1 | 105.74 | 1 | 52 buccal mucosa  | 1  | 1 | 0 | 0 | 0 | 0000/00/00 | 0 | 2 | 0 |
| 1 | 105.57 | 0 | 43 buccal mucosa  | 4  | 4 | 0 | 0 | 0 | 0000/00/00 | 0 | 2 | 0 |
| 1 | 105.44 | 1 | 60 alveolar ridge | 4  | 4 | 0 | 0 | 0 | 0000/00/00 | 0 | 1 | 0 |
| 1 | 104.92 | 1 | 57 ant tongue     | 1  | 1 | 0 | 0 | 0 | 0000/00/00 | 0 | 2 | 0 |
| 1 | 104.82 | 1 | 69 ant tongue     | 4  | 4 | 1 | 0 | 0 | 0000/00/00 | 0 | 2 | 1 |
| 1 | 50.00  | 0 | 61 ant tongue     | 3  | 1 | 1 | 0 | 0 | 0000/00/00 | 0 | 2 | 1 |
| 1 | 104.59 | 1 | 46 ant tongue     | 4  | 4 | 0 | 0 | 0 | 0000/00/00 | 0 | 2 | 0 |
| 1 | 39.31  | 0 | 82 alveolar ridge | 1  | 1 | x | x | 0 | 0000/00/00 | 0 | 1 |   |
| 1 | 104.43 | 1 | 77 alveolar ridge | 1  | 1 | x | x | 0 | 0000/00/00 | 0 | 2 |   |

|   |        |   |    |          |        |   |   |   |   |   |            |   |   |   |
|---|--------|---|----|----------|--------|---|---|---|---|---|------------|---|---|---|
| 1 | 105.31 | 1 | 55 | ant      | tongue | 3 | 3 | x | x | 0 | 0000/00/00 | 0 | 1 |   |
| 1 | 105.51 | 1 | 48 | buccal   | mucosa | 4 | 2 | 2 | 0 | 0 | 0000/00/00 | 0 | 2 | 1 |
| 1 | 105.25 | 1 | 39 | buccal   | mucosa | 1 | 1 | 0 | 0 | 0 | 0000/00/00 | 0 | 2 | 0 |
| 1 | 21.08  | 0 | 41 | ant      | tongue | 4 | 4 | 2 | 0 | 0 | 0000/00/00 | 0 | 2 | 1 |
| 1 | 104.46 | 1 | 58 | buccal   | mucosa | 1 | 1 | x | x | 0 | 0000/00/00 | 0 | 2 |   |
| 1 | 104.13 | 1 | 53 | buccal   | mucosa | 2 | 2 | 0 | 0 | 0 | 0000/00/00 | 0 | 2 | 0 |
| 1 | 104.13 | 1 | 39 | ant      | tongue | 4 | 4 | 2 | 1 | 0 | 0000/00/00 | 0 | 2 | 1 |
| 1 | 104.56 | 1 | 44 | ant      | tongue | 1 | 1 | 0 | 0 | 0 | 0000/00/00 | 0 | 1 | 0 |
| 1 | 19.93  | 0 | 37 | buccal   | mucosa | 1 | 1 | 0 | 0 | 0 | 2011/4/16  | 1 | 2 | 0 |
| 1 | 104.00 | 1 | 56 | lip      |        | 1 | 1 | 0 | 0 | 0 | 0000/00/00 | 0 | 2 | 0 |
| 1 | 104.00 | 1 | 61 | buccal   | mucosa | 1 | 1 | 0 | 0 | 0 | 0000/00/00 | 0 | 1 | 0 |
| 1 | 104.10 | 1 | 71 | lip      |        | 1 | 1 | x | x | 0 | 0000/00/00 | 0 | 2 |   |
| 1 | 103.84 | 1 | 47 | ant      | tongue | 4 | 2 | 2 | 0 | 0 | 0000/00/00 | 0 | 2 | 1 |
| 1 | 27.48  | 0 | 58 | buccal   | mucosa | 1 | 1 | x | x | 0 | 0000/00/00 | 0 | 1 |   |
| 1 | 23.97  | 0 | 49 | ant      | tongue | 1 | 1 | x | x | 0 | 2011/12/15 | 1 | 2 |   |
| 1 | 105.11 | 1 | 48 | alveolar | ridge  | 1 | 1 | 0 | 0 | 0 | 0000/00/00 | 0 | 2 | 0 |
| 1 | 103.67 | 1 | 59 | ant      | tongue | 4 | 4 | 2 | 0 | 0 | 0000/00/00 | 0 | 2 | 1 |
| 1 | 64.82  | 0 | 71 | ant      | tongue | 2 | 2 | 0 | 0 | 0 | 0000/00/00 | 0 | 2 | 0 |
| 1 | 103.44 | 1 | 57 | buccal   | mucosa | 1 | 1 | x | x | 0 | 2015/2/26  | 1 | 2 |   |
| 1 | 13.31  | 0 | 66 | lip      |        | 4 | 1 | 2 | 0 | 0 | 2011/7/30  | 1 | 2 | 1 |
| 1 | 103.38 | 1 | 46 | buccal   | mucosa | 2 | 2 | 0 | 0 | 0 | 0000/00/00 | 0 | 2 | 0 |
| 1 | 110.75 | 1 | 52 | buccal   | mucosa | 1 | 1 | x | x | 0 | 0000/00/00 | 0 | 1 |   |
| 1 | 24.03  | 0 | 57 | ant      | tongue | 4 | 4 | 1 | 0 | 0 | 2012/9/10  | 1 | 2 | 1 |
| 1 | 105.11 | 0 | 54 | ant      | tongue | 2 | 2 | 0 | 0 | 0 | 0000/00/00 | 0 | 2 | 0 |
| 1 | 78.16  | 0 | 75 | ant      | tongue | 1 | 1 | x | x | 0 | 0000/00/00 | 0 | 2 |   |
| 1 | 103.28 | 1 | 50 | buccal   | mucosa | 1 | 1 | 0 | 0 | 0 | 0000/00/00 | 0 | 2 | 0 |
| 1 | 103.34 | 1 | 66 | lip      |        | 1 | 1 | 0 | 0 | 0 | 0000/00/00 | 0 | 2 | 0 |
| 1 | 104.10 | 1 | 61 | ant      | tongue | 2 | 2 | 0 | 0 | 0 | 0000/00/00 | 0 | 2 | 0 |
| 1 | 63.44  | 0 | 66 | rmt      |        | 4 | 4 | 0 | 0 | 0 | 2012/12/12 | 1 | 2 | 0 |
| 1 | 57.77  | 0 | 36 | buccal   | mucosa | 1 | 1 | 0 | 0 | 0 | 0000/00/00 | 0 | 2 | 0 |
| 1 | 103.31 | 1 | 41 | alveolar | ridge  | 4 | 4 | 0 | 0 | 0 | 0000/00/00 | 0 | 2 | 0 |
| 1 | 20.00  | 0 | 46 | buccal   | mucosa | 4 | 4 | 2 | 0 | 0 | 2011/7/4   | 1 | 3 | 1 |
| 1 | 11.21  | 0 | 54 | ant      | tongue | 3 | 3 | x | x | 0 | 2011/5/10  | 1 | 2 |   |
| 1 | 66.00  | 0 | 70 | buccal   | mucosa | 2 | 2 | x | x | 0 | 0000/00/00 | 0 | 1 |   |
| 1 | 64.16  | 0 | 71 | lip      |        | 3 | 2 | 1 | 0 | 0 | 0000/00/00 | 0 | 2 | 1 |
| 1 | 102.85 | 1 | 58 | rmt      |        | 2 | 2 | 0 | 0 | 0 | 0000/00/00 | 0 | 2 | 0 |
| 1 | 13.34  | 0 | 61 | ant      | tongue | 4 | 2 | 2 | 1 | 0 | 2011/3/3   | 1 | 2 | 1 |
| 1 | 102.49 | 1 | 47 | alveolar | ridge  | 4 | 4 | 1 | 0 | 0 | 2012/12/28 | 1 | 2 | 1 |
| 1 | 103.31 | 1 | 38 | buccal   | mucosa | 1 | 1 | 0 | 0 | 0 | 0000/00/00 | 0 | 2 | 0 |
| 1 | 17.02  | 0 | 47 | ant      | tongue | 2 | 2 | 0 | 0 | 0 | 2011/5/27  | 1 | 2 | 0 |
| 1 | 102.39 | 1 | 53 | buccal   | mucosa | 3 | 2 | 1 | 0 | 0 | 2012/8/25  | 1 | 2 | 1 |
| 1 | 73.05  | 0 | 56 | buccal   | mucosa | 2 | 2 | 0 | 0 | 0 | 0000/00/00 | 0 | 2 | 0 |
| 1 | 102.49 | 1 | 56 | ant      | tongue | 1 | 1 | x | x | 0 | 0000/00/00 | 0 | 2 |   |
| 1 | 11.90  | 0 | 58 | mouth    | floor  | 2 | 2 | x | x | 0 | 0000/00/00 | 0 | 2 |   |
| 1 | 87.25  | 0 | 42 | ant      | tongue | 2 | 2 | 0 | 0 | 0 | 2011/4/22  | 1 | 2 | 0 |
| 1 | 12.10  | 0 | 47 | alveolar | ridge  | 4 | 4 | 1 | 0 | 0 | 2011/5/2   | 1 | 2 | 1 |
| 1 | 102.39 | 1 | 79 | rmt      |        | 2 | 2 | 0 | 0 | 0 | 0000/00/00 | 0 | 1 | 0 |
| 1 | 105.02 | 1 | 67 | buccal   | mucosa | 3 | 3 | x | x | 0 | 0000/00/00 | 0 | 1 |   |
| 1 | 101.57 | 1 | 68 | buccal   | mucosa | 1 | 1 | x | x | 0 | 0000/00/00 | 0 | 1 |   |
| 1 | 101.38 | 1 | 48 | lip      |        | 1 | 1 | 0 | 0 | 0 | 0000/00/00 | 0 | 2 | 0 |
| 1 | 101.21 | 1 | 56 | buccal   | mucosa | 1 | 1 | 0 | 0 | 0 | 0000/00/00 | 0 | 2 | 0 |
| 1 | 59.90  | 0 | 49 | rmt      |        | 2 | 2 | 0 | 0 | 0 | 0000/00/00 | 0 | 2 | 0 |
| 1 | 101.02 | 1 | 50 | buccal   | mucosa | 1 | 1 | 0 | 0 | 0 | 0000/00/00 | 0 | 2 | 0 |
| 1 | 100.98 | 1 | 55 | buccal   | mucosa | 4 | 4 | 0 | 0 | 0 | 2011/8/17  | 1 | 2 | 0 |
| 1 | 100.92 | 1 | 40 | rmt      |        |   | 1 | x | x | 0 | 0000/00/00 | 0 | 2 |   |
| 1 | 45.41  | 0 | 72 | lip      |        | 1 | 1 | 0 | 0 | 0 | 0000/00/00 | 0 | 2 | 0 |
| 1 | 14.30  | 0 | 58 | ant      | tongue | 3 | 1 | 1 | 0 | 0 | 2011/7/13  | 1 | 2 | 1 |
| 1 | 50.10  | 0 | 57 | ant      | tongue | 1 | 1 | 0 | 0 | 0 | 0000/00/00 | 0 | 2 | 0 |
| 1 | 100.85 | 1 | 54 | lip      |        | 1 | 1 | 0 | 0 | 0 | 0000/00/00 | 0 | 2 | 0 |
| 1 | 100.82 | 1 | 56 | alveolar | ridge  | 4 | 4 | 0 | 0 | 0 | 0000/00/00 | 0 | 2 | 0 |
| 1 | 102.00 | 1 | 49 | lip      |        | 2 | 2 | 0 | 0 | 0 | 0000/00/00 | 0 | 1 | 0 |
| 1 | 8.03   | 0 | 52 | lip      |        | 2 | 2 | x | x | 0 | 2011/4/12  | 1 | 3 |   |
| 1 | 101.15 | 1 | 59 | buccal   | mucosa | 4 | 4 | 0 | 0 | 0 | 0000/00/00 | 0 | 2 | 0 |
| 1 | 89.18  | 0 | 57 | buccal   | mucosa | 1 | 1 | 0 | 0 | 0 | 0000/00/00 | 0 | 2 | 0 |
| 1 | 100.43 | 1 | 42 | buccal   | muco   | 1 | 2 | 0 | 0 | 0 | 0000/00/00 | 0 | 2 | 0 |
| 1 | 100.66 | 1 | 58 | ant      | tongue | 0 | 1 | 0 | 0 | 0 | 0000/00/00 | 0 | 2 | 0 |
| 1 | 23.38  | 0 | 39 | lip      |        | 1 | 2 | 2 | 1 | 0 | 0000/00/00 | 0 | 2 | 1 |
| 1 | 100.43 | 1 | 56 | buccal   | muco   | 1 | 1 | x | x | 0 | 0000/00/00 | 0 | 1 |   |
| 1 | 101.18 | 1 | 61 | ant      | tongue | 1 | 1 | 0 | 0 | 0 | 0000/00/00 | 0 | 2 | 0 |
| 1 | 100.20 | 1 | 53 | buccal   | muco   | 0 | 4 | 0 | 0 | 0 | 0000/00/00 | 0 | 2 | 0 |
| 1 | 17.90  | 0 | 53 | ant      | tongue | 4 | 4 | x | x | 0 | 2011/8/4   | 1 | 2 |   |
| 1 | 100.13 | 1 | 57 | ant      | tongue | 1 | 1 | x | x | 0 | 0000/00/00 | 0 | 1 |   |

|   |        |   |                  |   |   |    |   |     |   |   |              |   |   |   |
|---|--------|---|------------------|---|---|----|---|-----|---|---|--------------|---|---|---|
| 1 | 83.67  | 0 | 72 lip           | 1 | 1 | 0  | 4 | 4   | 0 | 0 | 0 0000/00/00 | 0 | 2 | 0 |
| 1 | 100.00 | 1 | 51 alveolar ridg | 1 | 1 | 0  | 1 | 1 x | x |   | 0 0000/00/00 | 0 | 2 |   |
| 1 | 15.28  | 0 | 53 buccal muco   | 1 | 1 |    | 1 | 1 x | x |   | 0 2011/9/8   | 1 | 2 |   |
| 1 | 100.10 | 1 | 44 buccal muco   | 1 | 0 | 1  | 4 | 4   | 0 | 0 | 0 0000/00/00 | 0 | 2 | 0 |
| 1 | 100.43 | 1 | 53 lip           | 0 | 0 | 0  | 1 | 1   | 0 | 0 | 0 0000/00/00 | 0 | 2 | 0 |
| 1 | 100.62 | 1 | 38 ant tongue    | 1 | 1 | 0  | 1 | 1   | 0 | 0 | 0 0000/00/00 | 0 | 2 | 0 |
| 1 | 101.34 | 1 | 57 buccal mucosa |   |   | 0  | 1 | 1   | 0 | 0 | 0 0000/00/00 | 0 | 1 | 0 |
| 1 | 99.87  | 1 | 58 buccal muco   | 1 | 1 | 0  | 1 | 1 x | x |   | 0 0000/00/00 | 0 | 3 |   |
| 1 | 48.10  | 0 | 47 mouth floor   | 0 | 0 | 0  | 2 | 2   | 0 | 0 | 0 0000/00/00 | 0 | 2 | 0 |
| 1 | 8.49   | 0 | 44 alveolar ridg | 1 | 1 | 1  | 1 | 1 x | x |   | 0 0000/00/00 | 0 | 2 |   |
| 1 | 24.00  | 0 | 56 ant tongue    |   |   |    | 4 | 4   | 0 | 0 | 0 0000/00/00 | 0 | 2 | 0 |
| 1 | 99.48  | 1 | 62 buccal muco   | 1 | 0 | 0  | 2 | 2   | 0 | 0 | 0 0000/00/00 | 0 | 2 | 0 |
| 1 | 11.48  | 0 | 62 alveolar ridg | 0 | 0 | 0  | 4 | 4   | 0 | 0 | 0 0000/00/00 | 0 | 2 | 0 |
| 1 | 99.51  | 1 | 40 ant tongue    | 1 | 1 | 1  | 2 | 2   | 0 | 0 | 0 0000/00/00 | 0 | 2 | 0 |
| 1 | 98.07  | 0 | 51 buccal muco   | 1 | 1 | 0  | 2 | 2   | 0 | 0 | 0 0000/00/00 | 0 | 2 | 0 |
| 1 | 99.34  | 1 | 43 buccal muco   | 1 | 0 | 0  | 1 | 1   | 0 | 0 | 0 0000/00/00 | 0 | 2 | 0 |
| 1 | 21.15  | 0 | 66 ant tongue    | 0 | 0 | 0  | 4 | 2   | 2 | 1 | 0 2012/5/17  | 1 | 2 | 1 |
| 1 | 13.70  | 0 | 54 ant tongue    | 1 | 1 |    | 2 | 2   | 0 | 0 | 0 2011/9/8   | 1 | 2 | 0 |
| 1 | 99.54  | 1 | 71 ant tongue    | 0 | 0 | 0  | 3 | 1   | 1 | 0 | 0 0000/00/00 | 0 | 2 | 1 |
| 1 | 90.10  | 0 | 53 hard palate   | 1 | 1 | 0  | 2 | 2   | 0 | 0 | 0 0000/00/00 | 0 | 2 | 0 |
| 1 | 99.18  | 1 | 45 ant tongue    | 0 | 0 | 0  | 1 | 1   | 0 | 0 | 0 0000/00/00 | 0 | 2 | 0 |
| 1 | 80.13  | 0 | 59 buccal muco   | 1 | 0 | 0  | 1 | 1   | 0 | 0 | 0 0000/00/00 | 0 | 2 | 0 |
| 1 | 58.39  | 0 | 64 ant tongue    | 0 | 0 | 1  | 2 | 2   | 0 | 0 | 0 0000/00/00 | 0 | 2 | 0 |
| 1 | 99.02  | 1 | 60 buccal muco   | 1 | 1 | 0  | 1 | 1   | 0 | 0 | 0 0000/00/00 | 0 | 2 | 0 |
| 1 | 99.21  | 1 | 57 lip           | 1 | 1 | 1  | 1 | 1 x | x |   | 0 0000/00/00 | 0 | 2 |   |
| 1 | 100.23 | 1 | 57 ant tongue    | 0 | 0 | 0  | 1 | 1   | 0 | 0 | 0 0000/00/00 | 0 | 1 | 0 |
| 1 | 99.25  | 1 | 56 hard palate   | 0 | 0 | 0  | 4 | 4   | 0 | 0 | 0 0000/00/00 | 0 | 1 | 0 |
| 1 | 99.15  | 1 | 62 ant tongue    | 1 | 0 | 0  | 1 | 1   | 0 | 0 | 0 0000/00/00 | 0 | 2 | 0 |
| 1 | 99.08  | 1 | 59 buccal muco   | 0 | 0 | 0  | 4 | 4   | 0 | 0 | 0 0000/00/00 | 0 | 2 | 0 |
| 1 | 82.66  | 0 | 49 ant tongue    | 1 | 1 | 0  | 1 | 1   | 0 | 0 | 0 0000/00/00 | 0 | 2 | 0 |
| 1 | 98.79  | 1 | 37 rmt           | 0 | 0 | 0  | 4 | 4 x | x |   | 0 0000/00/00 | 0 | 2 |   |
| 1 | 18.82  | 0 | 31 ant tongue    | 1 | 0 | 0  | 1 | 1   | 0 | 0 | 0 0000/00/00 | 0 | 2 | 0 |
| 1 | 99.41  | 1 | 41 ant tongue    | 1 | 0 | 1  | 4 | 4   | 2 | 1 | 0 0000/00/00 | 0 | 2 | 1 |
| 1 | 98.56  | 1 | 58 ant tongue    | 0 | 0 | 0  | 4 | 4   | 0 | 0 | 0 0000/00/00 | 0 | 2 | 0 |
| 1 | 98.36  | 1 | 53 buccal muco   | 1 | 1 | 0  | 3 | 1   | 1 | 0 | 0 0000/00/00 | 0 | 2 | 1 |
| 1 | 93.02  | 0 | 59 buccal muco   | 1 | 0 | 1  | 4 | 4   | 2 | 0 | 0 0000/00/00 | 0 | 2 | 1 |
| 1 | 98.39  | 1 | 37 ant tongue    | 0 | 0 | 0  | 4 | 4   | 0 | 0 | 0 0000/00/00 | 0 | 2 | 0 |
| 1 | 98.16  | 1 | 60 buccal muco   | 0 | 0 | 0  | 1 | 1   | 0 | 0 | 0 0000/00/00 | 0 | 2 | 0 |
| 1 | 98.13  | 1 | 44 ant tongue    | 0 | 0 | 0  | 4 | 4   | 2 | 1 | 0 0000/00/00 | 0 | 2 | 1 |
| 1 | 98.26  | 1 | 51 alveolar ridg | 0 | 1 | 0  | 1 | 1   | 0 | 0 | 0 0000/00/00 | 0 | 1 | 0 |
| 1 | 98.10  | 1 | 49 buccal muco   | 1 | 1 | 1  | 4 | 4   | 1 | 0 | 0 0000/00/00 | 0 | 2 | 1 |
| 1 | 16.36  | 0 | 68 lip           | 0 | 0 | 0  | 4 | 4   | 0 | 0 | 0 0000/00/00 | 0 | 2 | 0 |
| 1 | 17.41  | 0 | 48 buccal muco   | 1 | 0 | 0  | 4 | 4   | 2 | 1 | 1 2012/7/11  | 1 | 2 | 1 |
| 1 | 98.72  | 1 | 63 rmt           | 1 | 1 | 0  | 4 | 4   | 0 | 0 | 0 0000/00/00 | 0 | 2 | 0 |
| 1 | 42.82  | 0 | 74 ant tongue    | 0 | 0 | 0  | 1 | 1 x | x |   | 0 2012/4/18  | 1 | 2 |   |
| 1 | 11.08  | 0 | 54 buccal muco   | 1 | 0 | 0  | 4 | 4   | 2 | 0 | 1 0000/00/00 | 0 | 2 | 1 |
| 1 | 13.18  | 0 | 71 buccal muco   | 1 | 0 | 0  | 4 | 4   | 1 | 0 | 0 0000/00/00 | 0 | 1 | 1 |
| 1 | 12.59  | 0 | 83 buccal muco   | 0 | 0 | 0  | 4 | 4   | 0 | 0 | 0 0000/00/00 | 0 | 3 | 0 |
| 1 | 102.62 | 1 | 56 buccal mucosa |   |   | 無法 | 4 | 2 x | x |   | 0 0000/00/00 | 0 | 3 |   |
| 1 | 98.07  | 1 | 48 buccal muco   | 1 | 0 | 0  | 2 | 2   | 0 | 0 | 0 0000/00/00 | 0 | 2 | 0 |
| 1 | 2.92   | 0 | 77 buccal muco   | 0 | 0 | 0  | 4 | 3   | 2 | 0 | 0 0000/00/00 | 0 | 2 | 1 |
| 1 | 97.41  | 1 | 51 hard palate   | 1 | 0 | 0  | 1 | 1   | 0 | 0 | 0 0000/00/00 | 0 | 2 | 0 |
| 1 | 109.31 | 1 | 71 ant tongue    |   |   |    | 2 | 2   | 0 | 0 | 0 0000/00/00 | 0 | 2 | 0 |
| 1 | 4.79   | 0 | 56 buccal muco   | 0 | 0 | 0  | 4 | 4   | 0 | 0 | 0 0000/00/00 | 0 | 2 | 0 |
| 1 | 18.26  | 0 | 59 ant tongue    | 1 | 1 | 1  | 4 | 4   | 0 | 0 | 0 0000/00/00 | 0 | 2 | 0 |
| 1 | 50.33  | 0 | 49 alveolar ridg | 1 | 1 | 0  | 4 | 4   | 2 | 0 | 0 0000/00/00 | 0 | 2 | 1 |
| 1 | 97.41  | 1 | 74 buccal muco   | 0 | 0 | 0  | 2 | 2   | 0 | 0 | 0 0000/00/00 | 0 | 2 | 0 |
| 1 | 97.70  | 1 | 58 ant tongue    | 1 | 0 | 0  | 2 | 2   | 0 | 0 | 0 2011/9/1   | 1 | 2 | 0 |
| 1 | 102.00 | 1 | 49 buccal mucosa |   |   |    | 1 | 1   | 0 | 0 | 0 0000/00/00 | 0 | 1 | 0 |
| 1 | 19.11  | 0 | 37 ant tongue    | 0 | 0 | 0  | 1 | 1   | 0 | 0 | 0 2012/2/21  | 1 | 2 | 0 |
| 1 | 57.54  | 0 | 48 ant tongue    | 1 | 0 | 0  | 1 | 1   | 0 | 0 | 0 0000/00/00 | 0 | 2 | 0 |
| 1 | 92.30  | 0 | 70 lip           | 0 | 0 | 0  | 1 | 1   | 0 | 0 | 0 0000/00/00 | 0 | 2 | 0 |
| 1 | 101.77 | 1 | 37 buccal mucosa |   |   |    | 4 | 4   | 0 | 0 | 0 0000/00/00 | 0 | 2 | 0 |
| 1 | 97.38  | 1 | 48 alveolar ridg | 0 | 0 | 0  | 4 | 4   | 0 | 0 | 0 0000/00/00 | 0 | 2 | 0 |
| 1 | 96.98  | 1 | 59 buccal muco   | 1 | 0 | 0  | 2 | 2   | 0 | 0 | 0 0000/00/00 | 0 | 1 | 0 |
| 1 | 67.05  | 0 | 59 alveolar ridg | 0 | 0 | 0  | 4 | 4 x | x |   | 0 2012/10/20 | 1 | 2 |   |
| 1 | 97.54  | 1 | 52 alveolar ridg | 1 | 0 | 0  | 2 | 2   | 0 | 0 | 0 0000/00/00 | 0 | 1 | 0 |
| 1 | 21.93  | 0 | 70 ant tongue    | 0 | 0 | 0  | 1 | 1   | 0 | 0 | 0 0000/00/00 | 0 | 2 | 0 |
| 1 | 39.74  | 0 | 71 alveolar ridg | 1 | 1 | 0  | 4 | 4   | 0 | 0 | 0 0000/00/00 | 0 | 2 | 0 |
| 1 | 97.21  | 1 | 54 ant tongue    | 1 | 0 | 1  | 1 | 1   | 0 | 0 | 0 0000/00/00 | 0 | 2 | 0 |
| 1 | 97.41  | 1 | 56 mouth floor   | 1 | 1 | 1  | 2 | 2   | 0 | 0 | 0 0000/00/00 | 0 | 3 | 0 |
| 1 | 96.75  | 1 | 44 buccal muco   | 1 | 0 | 0  | 1 | 1   | 0 | 0 | 0 0000/00/00 | 0 | 2 | 0 |

|   |        |   |    |                |   |   |   |   |   |   |   |   |            |   |   |   |
|---|--------|---|----|----------------|---|---|---|---|---|---|---|---|------------|---|---|---|
| 1 | 96.89  | 1 | 43 | buccal muco    | 1 | 0 | 0 | 4 | 4 | 0 | 0 | 0 | 0000/00/00 | 0 | 2 | 0 |
| 1 | 96.66  | 1 | 53 | ant tongue     | 1 | 1 | 0 | 2 | 2 | 0 | 0 | 0 | 0000/00/00 | 0 | 2 | 0 |
| 1 | 8.36   | 0 | 51 | ant tongue     | 1 | 0 | 0 | 4 | 4 | 2 | 1 | 0 | 2011/11/3  | 1 | 2 | 1 |
| 1 | 96.69  | 1 | 57 | alveolar ridgr | 1 | 0 | 0 | 3 | 2 | 1 | 0 | 0 | 0000/00/00 | 0 | 2 | 1 |
| 1 | 32.72  | 0 | 55 | ant tongue     | 1 | 1 | 1 | 2 | 2 | 0 | 0 | 0 | 0000/00/00 | 0 | 2 | 0 |
| 1 | 11.08  | 0 | 35 | buccal muco    | 0 | 0 | 0 | 4 | 4 | 2 | 1 | 0 | 2011/6/26  | 1 | 2 | 1 |
| 1 | 109.31 | 1 | 62 | hard palate    | 1 | 1 | 0 | 1 | 1 | 0 | 0 | 0 | 0000/00/00 | 0 | 2 | 0 |
| 1 | 101.77 | 1 | 37 | lip            | 1 | 1 | 0 | 2 | 2 | 0 | 0 | 0 | 0000/00/00 | 0 | 2 | 0 |
| 1 | 97.93  | 1 | 56 | alveolar ridgr | 1 | 0 | 0 | 4 | 4 | 2 | 1 | 0 | 0000/00/00 | 0 | 2 | 1 |
| 1 | 15.67  | 0 | 47 | ant tongue     | 1 | 0 | 0 | 4 | 4 | 2 | 1 | 0 | 2012/3/12  | 1 | 2 | 1 |
| 1 | 96.23  | 1 | 37 | buccal muco    | 1 | 1 | 0 | 1 | 1 | 0 | 0 | 0 | 0000/00/00 | 0 | 2 | 0 |
| 1 | 96.39  | 1 | 47 | buccal muco    | 1 | 0 | 0 | 4 | 4 | 0 | 0 | 0 | 2013/3/20  | 1 | 2 | 0 |
| 1 | 29.48  | 0 | 56 | buccal muco    | 0 | 0 | 0 | 1 | 1 | x | x | 0 | 2012/5/16  | 1 | 2 | 0 |
| 1 | 32.13  | 0 | 73 | buccal muco    | 0 | 0 | 0 | 2 | 2 | 0 | 0 | 0 | 2013/11/26 | 1 | 2 | 0 |
| 1 | 13.08  | 0 | 61 | buccal muco    | 1 | 0 | 0 | 1 | 1 | x | x | 0 | 2012/6/16  | 1 | 1 | 0 |
| 1 | 9.80   | 0 | 58 | ant tongue     | 1 | 0 | 0 | 4 | 4 | 0 | 0 | 0 | 0000/00/00 | 0 | 2 | 0 |
| 1 | 14.26  | 0 | 58 | alveolar ridgr | 1 | 1 | 0 | 4 | 1 | 2 | 0 | 0 | 2012/4/20  | 1 | 2 | 1 |
| 1 | 96.03  | 1 | 77 | buccal muco    | 0 | 1 | 0 | 1 | 1 | x | x | 0 | 0000/00/00 | 0 | 1 | 0 |
| 1 | 95.61  | 1 | 71 | lip            | 0 | 0 | 0 | 1 | 1 | 0 | 0 | 0 | 0000/00/00 | 0 | 2 | 0 |
| 1 | 95.54  | 1 | 56 | ant tongue     | 0 | 0 | 0 | 3 | 3 | 1 | 0 | 0 | 0000/00/00 | 0 | 2 | 1 |
| 1 | 95.61  | 1 | 58 | alveolar ridgr | 1 | 1 | 0 | 4 | 4 | 0 | 0 | 0 | 0000/00/00 | 0 | 2 | 0 |
| 1 | 95.38  | 1 | 56 | ant tongue     | 1 | 0 | 0 | 2 | 2 | 0 | 0 | 0 | 2014/2/19  | 1 | 2 | 0 |
| 1 | 95.41  | 1 | 41 | buccal muco    | 1 | 1 | 0 | 1 | 1 | 0 | 0 | 0 | 2015/3/30  | 1 | 2 | 0 |
| 1 | 72.46  | 0 | 48 | hard palate    | 1 | 0 | 0 | 4 | 4 | 1 | 0 | 0 | 0000/00/00 | 0 | 2 | 1 |
| 1 | 7.41   | 0 | 57 | hard palate    | 0 | 0 | 1 | 1 | 1 | x | x | 0 | 0000/00/00 | 0 | 2 | 0 |
| 1 | 95.18  | 1 | 59 | ant tongue     | 0 | 0 | 0 | 1 | 1 | x | x | 0 | 2015/2/6   | 1 | 2 | 0 |
| 1 | 21.67  | 0 | 60 | buccal muco    | 1 | 1 | 0 | 2 | 2 | 0 | 0 | 0 | 0000/00/00 | 0 | 2 | 0 |
| 1 | 42.33  | 0 | 76 | buccal muco    | 1 | 1 | 0 | 3 | 3 | 0 | 0 | 0 | 0000/00/00 | 0 | 1 | 0 |
| 1 | 95.08  | 1 | 41 | ant tongue     | 1 | 0 | 0 | 3 | 3 | 0 | 0 | 0 | 0000/00/00 | 0 | 2 | 0 |
| 1 | 95.08  | 1 | 52 | alveolar ridgr | 0 | 0 | 0 | 1 | 1 | x | x | 0 | 2012/3/8   | 1 | 2 | 0 |
| 1 | 25.41  | 0 | 78 | lip            | 0 | 0 | 0 | 1 | 1 | x | x | 0 | 2012/2/24  | 1 | 2 | 0 |
| 1 | 63.90  | 0 | 71 | alveolar ridgr | 0 | 0 | 0 | 4 | 4 | 0 | 0 | 0 | 0000/00/00 | 0 | 3 | 0 |
| 1 | 10.59  | 0 | 58 | buccal muco    | 0 | 0 | 0 | 4 | 4 | 2 | 1 | 0 | 2012/3/12  | 1 | 2 | 1 |
| 1 | 15.48  | 0 | 55 | buccal muco    | 1 | 1 | 1 | 2 | 2 | 0 | 0 | 0 | 2011/11/16 | 1 | 2 | 0 |
| 1 | 12.98  | 0 | 62 | alveolar ridgr | 0 | 0 | 0 | 4 | 4 | 0 | 0 | 0 | 2011/12/2  | 1 | 2 | 0 |
| 1 | 94.85  | 1 | 48 | alveolar ridgr | 0 | 0 | 0 | 1 | 1 | x | x | 0 | 0000/00/00 | 0 | 2 | 0 |
| 1 | 30.23  | 0 | 56 | ant tongue     | 1 | 1 | 0 | 4 | 4 | 2 | 0 | 0 | 0000/00/00 | 0 | 2 | 1 |
| 1 | 62.79  | 0 | 63 | buccal muco    | 0 | 0 | 0 | 1 | 1 | 0 | 0 | 0 | 0000/00/00 | 0 | 2 | 0 |
| 1 | 21.25  | 0 | 38 | buccal muco    | 1 | 0 | 0 | 3 | 2 | 1 | 0 | 0 | 0000/00/00 | 0 | 2 | 1 |
| 1 | 12.66  | 0 | 54 | rmt            | 1 | 1 | 0 | 1 | 1 | 0 | 0 | 0 | 2011/9/8   | 1 | 2 | 0 |
| 1 | 19.18  | 0 | 49 | rmt            | 0 | 0 | 0 | 4 | 4 | 1 | 0 | 0 | 2012/7/19  | 1 | 2 | 1 |
| 1 | 53.28  | 0 | 53 | buccal muco    | 1 | 1 | 0 | 3 | 3 | 1 | 1 | 0 | 0000/00/00 | 0 | 2 | 1 |
| 1 | 94.89  | 1 | 54 | lip            | 0 | 0 | 0 | 1 | 1 | 0 | 0 | 0 | 0000/00/00 | 0 | 2 | 0 |
| 1 | 94.56  | 1 | 56 | buccal muco    | 1 | 1 | 0 | 4 | 1 | 2 | 1 | 0 | 0000/00/00 | 0 | 2 | 1 |
| 1 | 10.26  | 0 | 38 | ant tongue     | 1 | 1 | 1 | 4 | 4 | 2 | 1 | 0 | 0000/00/00 | 0 | 2 | 1 |
| 1 | 38.98  | 0 | 52 | alveolar ridgr | 0 | 0 | 0 | 4 | 4 | 0 | 0 | 0 | 0000/00/00 | 0 | 1 | 0 |
| 1 | 94.82  | 1 | 53 | buccal muco    | 0 | 1 | 1 | 2 | 2 | 0 | 0 | 0 | 0000/00/00 | 0 | 2 | 0 |
| 1 | 66.49  | 0 | 45 | rmt            | 1 | 0 | 0 | 4 | 1 | 2 | 0 | 0 | 2016/2/11  | 1 | 2 | 1 |
| 1 | 104.00 | 1 | 61 | hard palate    | 1 | 0 | 0 | 1 | 1 | 0 | 0 | 0 | 0000/00/00 | 0 | 1 | 0 |
| 1 | 94.26  | 1 | 37 | ant tongue     | 1 | 0 | 1 | 2 | 2 | 0 | 0 | 0 | 0000/00/00 | 0 | 2 | 0 |
| 1 | 94.66  | 1 | 45 | ant tongue     | 1 | 0 | 0 | 2 | 2 | 0 | 0 | 0 | 0000/00/00 | 0 | 2 | 0 |
| 1 | 94.20  | 1 | 30 | ant tongue     | 1 | 0 | 0 | 4 | 4 | 2 | 0 | 0 | 0000/00/00 | 0 | 2 | 1 |
| 1 | 94.20  | 1 | 51 | buccal muco    | 0 | 0 | 0 | 1 | 1 | x | x | 0 | 2014/12/18 | 1 | 2 | 0 |
| 1 | 12.89  | 0 | 57 | buccal muco    | 0 | 0 | 0 | 4 | 2 | 2 | 1 | 0 | 2012/3/7   | 1 | 2 | 1 |
| 1 | 94.13  | 1 | 55 | alveolar ridgr | 1 | 0 | 1 | 4 | 4 | 0 | 0 | 0 | 0000/00/00 | 0 | 2 | 0 |
| 1 | 17.70  | 0 | 54 | buccal muco    | 1 | 0 | 0 | 2 | 2 | 0 | 0 | 0 | 2011/10/20 | 1 | 2 | 0 |
| 1 | 89.41  | 0 | 53 | lip            | 0 | 1 | 0 | 1 | 1 | x | x | 0 | 0000/00/00 | 0 | 2 | 0 |
| 1 | 94.03  | 1 | 72 | buccal muco    | 1 | 0 | 0 | 4 | 2 | 2 | 1 | 0 | 0000/00/00 | 0 | 2 | 1 |
| 1 | 94.95  | 1 | 52 | ant tongue     | 0 | 0 | 0 | 1 | 1 | 0 | 0 | 0 | 0000/00/00 | 0 | 2 | 0 |
| 1 | 9.57   | 0 | 49 | ant tongue     | 0 | 0 | 1 | 2 | 2 | 0 | 0 | 0 | 0000/00/00 | 0 | 2 | 0 |
| 1 | 28.95  | 0 | 67 | ant tongue     | 0 | 0 | 0 | 4 | 4 | 2 | 1 | 0 | 2012/11/22 | 1 | 2 | 1 |
| 1 | 47.18  | 0 | 73 | lip            | 1 | 0 | 0 | 1 | 1 | 0 | 0 | 0 | 2013/12/5  | 1 | 1 | 0 |
| 1 | 16.49  | 0 | 68 | alveolar ridgr | 0 | 0 | 0 | 4 | 4 | 0 | 0 | 0 | 2012/9/26  | 1 | 2 | 0 |
| 1 | 93.74  | 1 | 56 | ant tongue     | 1 | 0 | 0 | 4 | 4 | 0 | 0 | 0 | 0000/00/00 | 0 | 1 | 0 |
| 1 | 68.66  | 0 | 66 | lip            | 0 | 0 | 0 | 2 | 2 | 0 | 0 | 0 | 0000/00/00 | 0 | 2 | 0 |
| 1 | 93.54  | 1 | 54 | buccal muco    | 1 | 0 | 0 | 4 | 2 | 2 | 0 | 0 | 0000/00/00 | 0 | 2 | 1 |
| 1 | 93.28  | 1 | 81 | ant tongue     | 0 | 0 | 0 | 1 | 1 | 0 | 0 | 0 | 0000/00/00 | 0 | 1 | 0 |
| 1 | 93.31  | 1 | 38 | ant tongue     | 1 | 1 | 0 | 2 | 2 | 0 | 0 | 0 | 0000/00/00 | 0 | 2 | 0 |
| 1 | 93.05  | 1 | 57 | ant tongue     | 1 | 0 | 0 | 1 | 1 | 0 | 0 | 0 | 0000/00/00 | 0 | 2 | 0 |
| 1 | 93.80  | 1 | 52 | alveolar ridgr | 1 | 1 | 0 | 2 | 2 | 0 | 0 | 0 | 0000/00/00 | 0 | 2 | 0 |
| 1 | 11.08  | 0 | 58 | alveolar ridgr | 0 | 0 | 0 | 4 | 4 | 0 | 0 | 0 | 2012/6/5   | 1 | 2 | 0 |
| 1 | 92.95  | 1 | 57 | ant tongue     | 0 | 0 | 0 | 4 | 4 | 0 | 0 | 0 | 0000/00/00 | 0 | 2 | 0 |



|   |        |   |                   |   |   |   |   |     |   |   |              |   |   |   |
|---|--------|---|-------------------|---|---|---|---|-----|---|---|--------------|---|---|---|
| 1 | 93.90  | 1 | 53 buccal muco    | 1 | 1 | 0 | 2 | 2   | 0 | 0 | 0 0000/00/00 | 0 | 1 | 0 |
| 1 | 92.75  | 1 | 56 rmt            | 0 | 0 | 0 | 4 | 4   | 0 | 0 | 0 0000/00/00 | 0 | 2 | 0 |
| 1 | 15.61  | 0 | 47 ant tongue     | 0 | 0 | 0 | 4 | 4   | 2 | 1 | 0 2012/5/10  | 1 | 2 | 1 |
| 1 | 18.36  | 0 | 56 ant tongue     | 0 | 0 | 0 | 2 | 2 x | x |   | 0 2012/8/29  | 1 | 2 |   |
| 1 | 22.85  | 0 | 52 buccal muco    | 0 | 0 | 0 | 4 | 4   | 0 | 0 | 0 2012/2/21  | 1 | 2 | 0 |
| 1 | 92.82  | 1 | 45 buccal muco    | 1 | 1 | 0 | 2 | 2   | 0 | 0 | 0 0000/00/00 | 0 | 1 | 0 |
| 1 | 24.95  | 0 | 77 buccal muco    | 0 | 0 | 0 | 2 | 2   | 0 | 0 | 0 0000/00/00 | 0 | 2 | 0 |
| 1 | 23.54  | 0 | 39 buccal muco    | 1 | 1 | 1 | 4 | 4   | 0 | 0 | 0 0000/00/00 | 0 | 2 | 0 |
| 1 | 92.43  | 1 | 61 ant tongue     | 0 | 0 | 0 | 4 | 4   | 0 | 0 | 0 0000/00/00 | 0 | 2 | 0 |
| 1 | 103.41 | 1 | 66 buccal mucosa  | 1 | 1 | 0 | 1 | 1   | 0 | 0 | 0 0000/00/00 | 0 | 2 | 0 |
| 1 | 91.97  | 1 | 50 buccal muco    | 1 | 0 | 1 | 4 | 4   | 0 | 0 | 0 2015/5/12  | 1 | 2 | 0 |
| 1 | 92.07  | 1 | 53 alveolar ridge | 1 | 1 | 0 | 4 | 4   | 2 | 1 | 0 0000/00/00 | 0 | 2 | 1 |
| 1 | 91.93  | 1 | 44 ant tongue     | 0 | 0 | 0 | 1 | 1   | 0 | 0 | 0 0000/00/00 | 0 | 2 | 0 |
| 1 | 13.57  | 0 | 41 ant tongue     | 1 | 0 | 0 | 4 | 3   | 2 | 1 | 0 2012/4/19  | 1 | 2 | 1 |
| 1 | 91.90  | 1 | 50 buccal muco    | 0 | 0 | 0 | 1 | 1   | 0 | 0 | 0 0000/00/00 | 0 | 2 | 0 |
| 1 | 40.85  | 0 | 77 buccal muco    | 0 | 0 | 0 | 2 | 2   | 0 | 0 | 0 0000/00/00 | 0 | 2 | 0 |
| 1 | 92.20  | 1 | 55 rmt            | 1 | 0 | 1 | 4 | 4   | 2 | 1 | 1 0000/00/00 | 0 | 2 | 1 |
| 1 | 92.79  | 1 | 51 buccal muco    | 0 | 0 | 0 | 4 | 4   | 0 | 0 | 0 0000/00/00 | 0 | 2 | 0 |
| 1 | 92.39  | 1 | 56 ant tongue     | 1 | 0 | 1 | 2 | 2   | 0 | 0 | 0 0000/00/00 | 0 | 2 | 0 |
| 1 | 91.57  | 1 | 49 alveolar ridge | 1 | 0 | 1 | 2 | 2   | 0 | 0 | 0 0000/00/00 | 0 | 2 | 0 |
| 1 | 91.38  | 1 | 57 ant tongue     | 0 | 0 | 0 | 1 | 1   | 0 | 0 | 0 0000/00/00 | 0 | 2 | 0 |
| 1 | 91.48  | 1 | 37 ant tongue     | 1 | 1 | 1 | 4 | 4   | 1 | 0 | 0 0000/00/00 | 0 | 2 | 1 |
| 1 | 84.92  | 0 | 56 alveolar ridge | 1 | 1 | 1 | 4 | 4   | 0 | 0 | 0 0000/00/00 | 0 | 2 | 0 |
| 1 | 92.36  | 1 | 42 buccal muco    | 1 | 1 | 0 | 2 | 2   | 0 | 0 | 0 0000/00/00 | 0 | 2 | 0 |
| 1 | 35.21  | 0 | 36 buccal muco    | 0 | 0 | 1 | 1 | 1   | 0 | 0 | 0 0000/00/00 | 0 | 2 | 0 |
| 1 | 4.82   | 0 | 71 buccal muco    | 1 | 1 | 1 | 3 | 2   | 1 | 0 | 0 0000/00/00 | 0 | 2 | 1 |
| 1 | 103.44 | 1 | 65 buccal mucosa  | 1 | 1 | 0 | 2 | 2   | 0 | 0 | 0 2013/1/18  | 1 | 2 | 0 |
| 1 | 91.21  | 1 | 74 lip            | 0 | 0 | 0 | 3 | 3 x | x |   | 0 0000/00/00 | 0 | 2 |   |
| 1 | 93.80  | 1 | 83 alveolar ridge | 0 | 0 | 0 | 3 | 3   | 0 | 0 | 0 0000/00/00 | 0 | 1 | 0 |
| 1 | 73.61  | 0 | 70 lip            | 1 | 1 | 0 | 1 | 1   | 0 | 0 | 0 0000/00/00 | 0 | 2 | 0 |
| 1 | 90.79  | 1 | 41 ant tongue     | 0 | 0 | 0 | 1 | 1 x | x |   | 0 0000/00/00 | 0 | 2 |   |
| 1 | 90.82  | 1 | 63 alveolar ridge | 0 | 1 | 0 | 4 | 4   | 0 | 0 | 0 0000/00/00 | 0 | 2 | 0 |
| 1 | 74.56  | 0 | 50 buccal muco    | 1 | 1 | 1 | 1 | 1 x | x |   | 0 2014/11/11 | 1 | 2 |   |
| 1 | 90.56  | 1 | 61 buccal muco    | 0 | 0 | 0 | 4 | 4   | 0 | 0 | 0 0000/00/00 | 0 | 1 | 0 |
| 1 | 2.56   | 0 | 75 lip            | 1 | 0 | 0 | 3 | 1   | 1 | 1 | 0 0000/00/00 | 0 | 2 | 1 |
| 1 | 90.49  | 1 | 44 ant tongue     | 1 | 1 | 1 | 4 | 2   | 2 | 0 | 0 0000/00/00 | 0 | 2 | 1 |
| 1 | 90.69  | 1 | 67 buccal muco    | 1 | 0 | 0 | 1 | 1   | 0 | 0 | 0 0000/00/00 | 0 | 2 | 0 |
| 1 | 65.11  | 0 | 53 buccal muco    | 0 | 0 | 0 | 4 | 3   | 2 | 0 | 0 2016/8/7   | 1 | 2 | 1 |
| 1 | 91.34  | 1 | 54 buccal muco    | 0 | 0 | 0 | 1 | 1   | 0 | 0 | 0 2012/7/18  | 1 | 2 | 0 |
| 1 | 90.36  | 1 | 80 buccal muco    | 0 | 0 | 0 | 2 | 2   | 0 | 0 | 0 0000/00/00 | 0 | 1 | 0 |
| 1 | 47.28  | 0 | 61 buccal muco    | 0 | 0 | 0 | 4 | 4   | 0 | 0 | 0 0000/00/00 | 0 | 2 | 0 |
| 1 | 90.30  | 1 | 81 ant tongue     | 0 | 0 | 0 | 1 | 1 x | x |   | 0 2012/2/3   | 1 | 2 |   |
| 1 | 90.30  | 1 | 38 rmt            | 1 | 0 | 1 | 4 | 2   | 2 | 1 | 0 0000/00/00 | 0 | 2 | 1 |
| 1 | 90.26  | 1 | 59 lip            | 1 | 1 | 1 | 1 | 1 x | x |   | 0 0000/00/00 | 0 | 2 |   |
| 1 | 20.59  | 0 | 54 alveolar ridge | 0 | 0 | 0 | 4 | 4   | 0 | 0 | 0 2012/4/25  | 1 | 1 | 0 |
| 1 | 90.33  | 1 | 55 lip            | 0 | 0 | 0 | 1 | 1   | 0 | 0 | 0 0000/00/00 | 0 | 1 | 0 |
| 1 | 90.72  | 1 | 53 buccal muco    | 0 | 0 | 0 | 1 | 1 x | x |   | 0 0000/00/00 | 0 | 1 |   |
| 1 | 89.87  | 1 | 64 ant tongue     | 0 | 0 | 0 | 4 | 4   | 0 | 0 | 0 0000/00/00 | 0 | 2 | 0 |
| 1 | 89.87  | 1 | 46 ant tongue     | 0 | 0 | 0 | 4 | 4   | 2 | 1 | 0 2014/4/30  | 1 | 2 | 1 |
| 1 | 90.92  | 1 | 35 ant tongue     | 1 | 1 | 0 | 4 | 4   | 2 | 1 | 0 2016/7/1   | 1 | 2 | 1 |
| 1 | 90.30  | 1 | 55 alveolar ridge | 0 | 0 | 0 | 2 | 2   | 0 | 0 | 0 0000/00/00 | 0 | 2 | 0 |
| 1 | 90.33  | 1 | 47 buccal muco    | 1 | 1 | 0 | 3 | 3   | 1 | 1 | 0 0000/00/00 | 0 | 2 | 1 |
| 1 | 90.33  | 1 | 42 buccal muco    | 1 | 1 | 0 | 1 | 1   | 0 | 0 | 0 0000/00/00 | 0 | 2 | 0 |
| 1 | 61.02  | 0 | 67 alveolar ridge | 0 | 0 | 0 | 4 | 4   | 0 | 0 | 0 2016/4/22  | 1 | 2 | 0 |
| 1 | 63.64  | 0 | 69 ant tongue     | 1 | 0 | 0 | 1 | 1 x | x |   | 0 0000/00/00 | 0 | 2 |   |
| 1 | 28.33  | 0 | 56 alveolar ridge | 1 | 1 | 0 | 3 | 3   | 0 | 0 | 0 0000/00/00 | 0 | 3 | 0 |
| 1 | 90.46  | 1 | 50 buccal muco    | 0 | 0 | 0 | 1 | 1   | 0 | 0 | 0 0000/00/00 | 0 | 2 | 0 |
| 1 | 90.36  | 1 | 53 alveolar ridge | 0 | 1 | 0 | 1 | 1   | 0 | 0 | 0 0000/00/00 | 0 | 2 | 0 |
| 1 | 39.44  | 0 | 57 ant tongue     | 1 | 0 | 1 | 4 | 4   | 0 | 0 | 0 0000/00/00 | 0 | 2 | 0 |
| 1 | 14.69  | 0 | 70 ant tongue     | 0 | 0 | 0 | 2 | 2   | 0 | 0 | 0 2012/12/11 | 1 | 2 | 0 |
| 1 | 62.62  | 0 | 53 hard palate    | 0 | 0 | 0 | 3 | 3   | 1 | 0 | 0 0000/00/00 | 0 | 2 | 1 |
| 1 | 89.18  | 1 | 40 ant tongue     | 1 | 0 | 1 | 3 | 3   | 0 | 0 | 0 0000/00/00 | 0 | 2 | 0 |
| 1 | 89.84  | 1 | 40 rmt            | 0 | 0 | 1 | 1 | 1   | 0 | 0 | 0 0000/00/00 | 0 | 2 | 0 |
| 1 | 90.23  | 1 | 57 rmt            | 0 | 0 | 0 | 2 | 2   | 0 | 0 | 0 0000/00/00 | 0 | 2 | 0 |
| 1 | 73.11  | 0 | 60 alveolar ridge | 0 | 0 | 0 | 4 | 4   | 0 | 0 | 0 0000/00/00 | 0 | 2 | 0 |
| 1 | 89.61  | 1 | 50 ant tongue     | 1 | 1 | 1 | 4 | 4   | 0 | 0 | 0 0000/00/00 | 0 | 2 | 0 |
| 1 | 88.98  | 1 | 64 mouth floor    | 0 | 1 | 0 | 2 | 2   | 0 | 0 | 0 2012/7/6   | 1 | 2 | 0 |
| 1 | 44.82  | 0 | 74 rmt            | 0 | 0 | 0 | 4 | 4   | 0 | 0 | 0 2014/9/11  | 1 | 2 | 0 |
| 1 | 88.89  | 1 | 66 buccal muco    | 0 | 0 | 0 | 1 | 1   | 0 | 0 | 0 0000/00/00 | 0 | 2 | 0 |
| 1 | 89.28  | 1 | 48 buccal muco    | 1 | 1 | 0 | 4 | 4   | 0 | 0 | 0 2012/7/3   | 1 | 2 | 0 |
| 1 | 88.75  | 1 | 51 lip            | 1 | 1 | 1 | 4 | 1   | 2 | 0 | 0 2012/9/27  | 1 | 2 | 1 |
| 1 | 88.66  | 1 | 52 ant tongue     | 1 | 1 | 1 | 1 | 1   | 0 | 0 | 0 0000/00/00 | 0 | 2 | 0 |

|   |       |   |    |                |   |   |   |    |   |   |   |   |            |   |   |   |
|---|-------|---|----|----------------|---|---|---|----|---|---|---|---|------------|---|---|---|
| 1 | 10.39 | 0 | 50 | mouth floor    | 1 | 1 | 1 | 1  | 1 | 0 | 0 | 1 | 0000/00/00 | 0 | 2 | 0 |
| 1 | 88.62 | 1 | 59 | ant tongue     | 1 | 1 | 0 | 4  | 4 | 0 | 0 | 0 | 0000/00/00 | 0 | 2 | 0 |
| 1 | 59.70 | 0 | 46 | buccal muco    | 1 | 0 | 0 | 1  | 1 | x | x | 1 | 0000/00/00 | 0 | 1 | 0 |
| 1 | 88.85 | 1 | 56 | buccal muco    | 0 | 0 | 1 | 3  | 3 | 0 | 0 | 0 | 0000/00/00 | 0 | 1 | 0 |
| 1 | 85.48 | 0 | 56 | ant tongue     | 0 | 0 | 0 | 1  | 1 | 0 | 0 | 0 | 0000/00/00 | 0 | 1 | 0 |
| 1 | 88.92 | 1 | 43 | ant tongue     | 1 | 1 | 1 | 1  | 1 | 0 | 0 | 0 | 0000/00/00 | 0 | 2 | 0 |
| 1 | 88.52 | 1 | 49 | buccal muco    | 1 | 1 | 1 | 1  | 1 | 0 | 0 | 0 | 0000/00/00 | 0 | 2 | 0 |
| 1 | 88.52 | 1 | 55 | buccal muco    | 0 | 1 | 1 | 2  | 2 | 0 | 0 | 0 | 2012/5/17  | 1 | 2 | 0 |
| 1 | 88.39 | 1 | 58 | ant tongue     | 1 | 1 | 1 | 4  | 4 | 0 | 0 | 0 | 0000/00/00 | 0 | 2 | 0 |
| 1 | 10.20 | 0 | 50 | ant tongue     | 1 | 1 | 1 | 4  | 4 | 2 | 0 | 0 | 2012/9/6   | 1 | 2 | 1 |
| 1 | 35.41 | 0 | 63 | mouth floor    | 0 | 0 | 0 | 4  | 4 | 0 | 0 | 0 | 2013/11/5  | 1 | 3 | 0 |
| 1 | 9.02  | 0 | 72 | buccal muco    | 1 | 0 | 1 | 4  | 2 | 2 | 1 | 0 | 0000/00/00 | 0 | 2 | 1 |
| 1 | 87.90 | 1 | 71 | buccal muco    | 1 | 0 | 0 | 4  | 4 | 0 | 0 | 0 | 0000/00/00 | 0 | 2 | 0 |
| 1 | 87.70 | 1 | 62 | ant tongue     | 1 | 0 | 1 | 1  | 1 | 0 | 0 | 0 | 0000/00/00 | 0 | 3 | 0 |
| 1 | 88.39 | 1 | 49 | alveolar ridg  | 1 | 0 | 0 | 4  | 4 | 0 | 0 | 0 | 0000/00/00 | 0 | 2 | 0 |
| 1 | 87.77 | 1 | 61 | ant tongue     | 1 | 0 | 0 | 2  | 2 | 0 | 0 | 0 | 0000/00/00 | 0 | 1 | 0 |
| 1 | 88.49 | 1 | 45 | buccal muco    | 1 | 1 | 1 | 無法 | 1 | x | x | 0 | 0000/00/00 | 0 | 2 | 0 |
| 1 | 87.54 | 1 | 47 | buccal muco    | 1 | 1 | 1 | 2  | 2 | 0 | 0 | 0 | 0000/00/00 | 0 | 2 | 0 |
| 1 | 38.75 | 0 | 58 | alveolar ridge | 1 | 1 | 1 | 1  | 1 | x | x | 0 | 0000/00/00 | 0 | 1 | 0 |
| 1 | 87.38 | 1 | 47 | ant tongue     | 1 | 1 | 1 | 1  | 1 | x | x | 0 | 0000/00/00 | 0 | 1 | 0 |
| 1 | 87.34 | 1 | 61 | buccal muco    | 1 | 0 | 0 | 4  | 4 | 0 | 0 | 0 | 0000/00/00 | 0 | 2 | 0 |
| 1 | 20.92 | 0 | 57 | buccal muco    | 0 | 0 | 0 | 1  | 1 | x | x | 1 | 0000/00/00 | 0 | 2 | 0 |
| 1 | 87.21 | 1 | 53 | buccal muco    | 1 | 1 | 0 | 2  | 2 | 0 | 0 | 0 | 0000/00/00 | 0 | 2 | 0 |
| 1 | 87.74 | 1 | 55 | buccal muco    | 0 | 0 | 0 | 1  | 1 | 0 | 0 | 0 | 0000/00/00 | 0 | 1 | 0 |
| 1 | 87.38 | 1 | 52 | buccal muco    | 1 | 0 | 1 | 1  | 1 | x | x | 0 | 2013/12/4  | 1 | 2 | 0 |
| 1 | 98.13 | 1 | 54 | alveolar ridge | 1 | 1 | 0 | 1  | 1 | x | x | 0 | 2012/2/14  | 1 | 2 | 0 |
| 1 | 87.90 | 1 | 61 | lip            | 0 | 0 | 1 | 2  | 2 | 0 | 0 | 0 | 0000/00/00 | 0 | 2 | 0 |
| 1 | 87.15 | 1 | 60 | ant tongue     | 1 | 0 | 1 | 4  | 2 | 2 | 1 | 1 | 0000/00/00 | 0 | 2 | 1 |
| 1 | 0.85  | 0 | 63 | buccal muco    | 1 | 0 | 1 | 4  | 2 | 2 | 1 | 0 | 0000/00/00 | 0 | 3 | 1 |
| 1 | 87.25 | 1 | 60 | lip            | 1 | 1 | 0 | 2  | 2 | 0 | 0 | 0 | 0000/00/00 | 0 | 2 | 0 |
| 1 | 87.08 | 1 | 38 | buccal muco    | 1 | 1 | 1 | 1  | 1 | x | x | 0 | 0000/00/00 | 0 | 2 | 0 |
| 1 | 10.52 | 0 | 44 | mouth floor    | 1 | 1 | 1 | 2  | 2 | 0 | 0 | 0 | 2012/8/28  | 1 | 2 | 0 |
| 1 | 9.93  | 0 | 41 | buccal muco    | 1 | 1 | 1 | 4  | 4 | x | x | 1 | 2012/4/9   | 1 | 2 | 0 |
| 1 | 55.80 | 0 | 69 | hard palate    | 1 | 1 | 1 | 1  | 1 | x | x | 0 | 2015/2/11  | 1 | 1 | 0 |
| 1 | 86.79 | 1 | 79 | buccal muco    | 1 | 1 | 1 | 1  | 1 | 0 | 0 | 0 | 0000/00/00 | 0 | 2 | 0 |
| 1 | 96.69 | 1 | 37 | ant tongue     | 0 | 0 | 0 | 2  | 2 | 0 | 0 | 1 | 2012/3/1   | 1 | 1 | 0 |
| 1 | 48.10 | 0 | 52 | ant tongue     | 1 | 1 | 1 | 3  | 3 | 0 | 0 | 0 | 0000/00/00 | 0 | 2 | 0 |
| 1 | 32.56 | 0 | 59 | mouth floor    | 1 | 1 | 1 | 2  | 2 | 0 | 0 | 0 | 0000/00/00 | 0 | 1 | 0 |
| 1 | 52.07 | 0 | 54 | buccal muco    | 1 | 1 | 1 | 2  | 2 | 0 | 0 | 0 | 0000/00/00 | 0 | 2 | 0 |
| 1 | 7.48  | 0 | 63 | mouth floor    | 1 | 1 | 1 | 1  | 1 | 0 | 0 | 0 | 0000/00/00 | 0 | 2 | 0 |
| 1 | 42.92 | 0 | 76 | lip            | 1 | 1 | 0 | 2  | 2 | x | x | 0 | 0000/00/00 | 0 | 2 | 0 |
| 1 | 35.93 | 0 | 68 | ant tongue     | 1 | 1 | 1 | 1  | 1 | 0 | 0 | 0 | 0000/00/00 | 0 | 2 | 0 |
| 1 | 86.43 | 1 | 75 | lip            | 1 | 1 | 1 | 2  | 2 | 0 | 0 | 0 | 0000/00/00 | 0 | 2 | 0 |
| 1 | 86.46 | 1 | 45 | alveolar ridge | 1 | 1 | 0 | 1  | 1 | x | x | 0 | 0000/00/00 | 0 | 2 | 0 |
| 1 | 31.05 | 0 | 73 | buccal muco    | 0 | 0 | 0 | 1  | 1 | x | x | 0 | 0000/00/00 | 0 | 1 | 0 |
| 1 | 86.39 | 1 | 58 | alveolar ridg  | 1 | 1 | 1 | 無法 | 1 | x | x | 0 | 0000/00/00 | 0 | 2 | 0 |
| 1 | 16.75 | 0 | 79 | buccal muco    | 0 | 0 | 0 | 2  | 2 | x | x | 1 | 0000/00/00 | 0 | 2 | 0 |
| 1 | 86.89 | 1 | 50 | alveolar ridge | 1 | 1 | 1 | 4  | 4 | 2 | 0 | 0 | 2012/8/14  | 1 | 2 | 1 |
| 1 | 86.46 | 1 | 43 | lip            | 1 | 1 | 1 | 1  | 1 | 0 | 0 | 0 | 0000/00/00 | 0 | 2 | 0 |
| 1 | 86.43 | 1 | 48 | lip            | 1 | 0 | 1 | 1  | 1 | 0 | 0 | 0 | 0000/00/00 | 0 | 2 | 0 |
| 1 | 48.66 | 0 | 51 | ant tongue     | 1 | 0 | 1 | 1  | 1 | 0 | 0 | 0 | 0000/00/00 | 0 | 2 | 0 |
| 1 | 87.08 | 1 | 45 | buccal muco    | 1 | 1 | 1 | 3  | 2 | 1 | 1 | 1 | 0000/00/00 | 0 | 2 | 1 |
| 1 | 86.69 | 1 | 45 | ant tongue     | 1 | 1 | 1 | 4  | 1 | 2 | 0 | 0 | 0000/00/00 | 0 | 2 | 1 |
| 1 | 86.36 | 1 | 55 | buccal muco    | 1 | 0 | 1 | 1  | 1 | 0 | 0 | 0 | 0000/00/00 | 0 | 2 | 0 |
| 1 | 17.51 | 0 | 76 | alveolar ridg  | 1 | 1 | 0 | 4  | 4 | 0 | 0 | 0 | 2012/7/16  | 1 | 2 | 0 |
| 1 | 86.89 | 1 | 46 | buccal muco    | 1 | 0 | 1 | 1  | 1 | x | x | 0 | 0000/00/00 | 0 | 2 | 0 |
| 1 | 9.74  | 0 | 45 | lip            | 0 | 1 | 1 | 4  | 4 | 2 | 1 | 0 | 2012/11/5  | 1 | 2 | 1 |
| 1 | 86.23 | 1 | 44 | buccal muco    | 1 | 1 | 1 | 4  | 4 | 2 | 1 | 0 | 0000/00/00 | 0 | 3 | 1 |
| 1 | 86.79 | 1 | 55 | lip            | 1 | 1 | 1 | 無法 | 3 | x | x | 0 | 0000/00/00 | 0 | 1 | 0 |
| 1 | 86.07 | 1 | 62 | buccal muco    | 1 | 0 | 0 | 1  | 1 | x | x | 1 | 0000/00/00 | 0 | 2 | 0 |
| 1 | 86.16 | 1 | 77 | buccal muco    | 0 | 0 | 1 | 1  | 1 | x | x | 0 | 0000/00/00 | 0 | 2 | 0 |
| 1 | 36.33 | 0 | 32 | ant tongue     | 1 | 1 | 1 | 4  | 4 | 2 | 1 | 0 | 0000/00/00 | 0 | 2 | 1 |
| 1 | 87.48 | 1 | 74 | buccal muco    | 1 | 1 | 1 | 1  | 1 | x | x | 0 | 0000/00/00 | 0 | 1 | 0 |
| 1 | 86.66 | 1 | 54 | buccal muco    | 1 | 1 | 1 | 4  | 4 | 0 | 0 | 1 | 0000/00/00 | 0 | 1 | 0 |
| 1 | 85.93 | 1 | 61 | buccal muco    | 1 | 0 | 0 | 2  | 2 | 0 | 0 | 0 | 2016/1/18  | 1 | 2 | 0 |
| 1 | 85.97 | 1 | 56 | buccal muco    | 1 | 0 | 1 | 1  | 1 | 0 | 0 | 0 | 0000/00/00 | 0 | 1 | 0 |
| 1 | 38.49 | 0 | 73 | ant tongue     | 1 | 1 | 1 | 3  | 3 | 0 | 0 | 0 | 0000/00/00 | 0 | 1 | 0 |
| 1 | 85.93 | 1 | 61 | ant tongue     | 1 | 0 | 1 | 3  | 2 | 1 | 0 | 0 | 0000/00/00 | 0 | 2 | 1 |
| 1 | 86.56 | 1 | 52 | buccal muco    | 1 | 0 | 0 | 2  | 2 | 0 | 0 | 0 | 0000/00/00 | 0 | 1 | 0 |
| 1 | 85.74 | 1 | 57 | alveolar ridg  | 0 | 0 | 0 | 1  | 1 | x | x | 0 | 0000/00/00 | 0 | 1 | 0 |
| 1 | 76.82 | 0 | 68 | ant tongue     | 0 | 0 | 0 | 1  | 1 | x | x | 0 | 0000/00/00 | 0 | 2 | 0 |
| 1 | 4.39  | 0 | 74 | alveolar ridge | 1 | 0 | 0 | 4  | 4 | 2 | 1 | 0 | 0000/00/00 | 0 | 2 | 1 |

|   |       |   |                  |   |   |      |     |     |   |   |              |   |   |   |
|---|-------|---|------------------|---|---|------|-----|-----|---|---|--------------|---|---|---|
| 1 | 49.38 | 0 | 56 ant tongue    | 0 | 0 | 0    | 4   | 4   | 1 | 0 | 0 0000/00/00 | 0 | 2 | 1 |
| 1 | 20.85 | 0 | 56 ant tongue    | 0 | 0 | 0    | 1   | 1   | 0 | 0 | 0 0000/00/00 | 0 | 2 | 0 |
| 1 | 85.67 | 1 | 61 ant tongue    | 1 | 0 | 0    | 2   | 2   | 0 | 0 | 0 0000/00/00 | 0 | 2 | 0 |
| 1 | 10.95 | 0 | 60 buccal muco   | 0 | 0 | 0    | 2   | 2 x | x |   | 0 0000/00/00 | 0 | 2 |   |
| 1 | 5.57  | 0 | 84 ant tongue    | 0 | 0 | 0    | 2   | 2 x | x |   | 0 0000/00/00 | 0 | 2 |   |
| 1 | 86.43 | 1 | 62 lip           | 0 | 0 | 0    | 1   | 1 x | x |   | 0 0000/00/00 | 0 | 2 |   |
| 1 | 95.18 | 1 | 58 buccal muco   | 1 | 1 | 0    | 1   | 1   | 0 | 0 | 0 2014/8/11  | 1 | 2 | 0 |
| 1 | 85.28 | 1 | 51 buccal muco   | 1 | 0 | 1    | 2   | 2 x | x |   | 0 0000/00/00 | 0 | 2 |   |
| 1 | 62.85 | 0 | 63 lip           | 0 | 0 | 0    | 2   | 2 x | x |   | 0 0000/00/00 | 0 | 2 |   |
| 1 | 18.43 | 0 | 55 ant tongue    | 0 | 1 | 0    | 4   | 4   | 1 | 0 | 0 2013/1/4   | 1 | 2 | 1 |
| 1 | 85.67 | 1 | 47 alveolar ridg | 1 | 1 | 1    | 1   | 1 x | x |   | 0 0000/00/00 | 0 | 1 |   |
| 1 | 85.15 | 1 | 59 ant tongue    | 1 | 1 | 1    | 2   | 2   | 0 | 0 | 0 0000/00/00 | 0 | 2 | 0 |
| 1 | 6.46  | 0 | 49 ant tongue    | 0 | 0 | 0    | 4   | 2   | 2 | 1 | 0 0000/00/00 | 0 | 2 | 1 |
| 1 | 85.02 | 1 | 59 buccal muco   | 1 | 0 | 0    | 2   | 2   | 0 | 0 | 0 2013/7/29  | 1 | 2 | 0 |
| 1 | 83.80 | 0 | 41 ant tongue    | 1 | 1 | 1    | 4   | 4   | 0 | 0 | 0 0000/00/00 | 0 | 2 | 0 |
| 1 | 85.51 | 1 | 70 ant tongue    | 0 | 0 | 0    | 1   | 1 x | x |   | 0 2013/3/22  | 1 | 2 |   |
| 1 | 82.23 | 0 | 44 alveolar ridg | 1 | 1 | 0    | 2   | 2   | 0 | 0 | 0 0000/00/00 | 0 | 2 | 0 |
| 1 | 84.92 | 1 | 48 buccal muco   | 1 | 1 | 1    | 3   | 1   | 1 | 0 | 0 0000/00/00 | 0 | 2 | 1 |
| 1 | 50.59 | 0 | 59 buccal muco   | 1 | 0 | 0    | 4   | 4   | 0 | 0 | 0 2015/4/14  | 1 | 2 | 0 |
| 1 | 22.49 | 0 | 68 alveolar ridg | 1 | 1 | 0    | 2   | 2   | 0 | 0 | 0 0000/00/00 | 0 | 2 | 0 |
| 1 | 85.05 | 1 | 57 lip           | 0 | 0 | 0    | 1   | 1 x | x |   | 0 2013/11/26 | 1 | 2 |   |
| 1 | 85.25 | 1 | 41 lip           | 1 | 1 | 0    | 2   | 2   | 0 | 0 | 0 0000/00/00 | 0 | 2 | 0 |
| 1 | 23.90 | 0 | 44 buccal muco   | 0 | 0 | 0    | 1   | 1   | 0 | 0 | 0 2013/9/6   | 1 | 2 | 0 |
| 1 | 26.26 | 0 | 74 alveolar ridg | 1 | 0 | 0    | 4   | 4 x | x |   | 0 0000/00/00 | 0 | 2 |   |
| 1 | 85.02 | 1 | 61 buccal muco   | 1 | 0 | 0 無法 | 2 x | x   |   |   | 0 0000/00/00 | 0 | 1 |   |
| 1 | 21.28 | 0 | 55 ant tongue    | 1 | 0 | 0    | 1   | 1   | 0 | 0 | 0 0000/00/00 | 0 | 2 | 0 |
| 1 | 84.36 | 1 | 45 mouth floor   | 1 | 1 | 1    | 4   | 4   | 0 | 0 | 0 0000/00/00 | 0 | 2 | 0 |
| 1 | 7.11  | 0 | 48 ant tongue    | 1 | 1 | 0    | 4   | 4   | 2 | 1 | 0 2012/11/12 | 1 | 2 | 1 |
| 1 | 4.79  | 0 | 33 ant tongue    | 1 | 0 | 1    | 4   | 4   | 2 | 1 | 0 0000/00/00 | 0 | 2 | 1 |
| 1 | 84.49 | 1 | 55 ant tongue    | 0 | 0 | 0    | 4   | 4   | 0 | 0 | 0 0000/00/00 | 0 | 2 | 0 |
| 1 | 84.30 | 1 | 44 buccal muco   | 0 | 0 | 0    | 1   | 1   | 0 | 0 | 0 0000/00/00 | 0 | 1 | 0 |
| 1 | 84.79 | 1 | 75 ant tongue    | 0 | 0 | 0    | 2   | 2   | 0 | 0 | 0 0000/00/00 | 0 | 2 | 0 |
| 1 | 84.59 | 1 | 54 buccal muco   | 0 | 0 | 1    | 1   | 1 x | x |   | 0 0000/00/00 | 0 | 1 |   |
| 1 | 5.05  | 0 | 59 mouth floor   | 0 | 0 | 0    | 4   | 4   | 1 | 1 | 0 2012/9/10  | 1 | 2 | 1 |
| 1 | 84.62 | 1 | 38 buccal muco   | 0 | 1 | 0    | 2   | 2   | 0 | 0 | 0 0000/00/00 | 0 | 2 | 0 |
| 1 | 27.67 | 0 | 66 rmt           | 0 | 0 | 0    | 2   | 2   | 0 | 0 | 0 0000/00/00 | 0 | 2 | 0 |
| 1 | 83.80 | 1 | 58 buccal muco   | 1 | 1 | 0    | 1   | 1   | 0 | 0 | 0 0000/00/00 | 0 | 2 | 0 |
| 1 | 45.67 | 0 | 71 rmt           | 0 | 1 | 0    | 4   | 4   | 0 | 0 | 0 0000/00/00 | 0 | 2 | 0 |
| 1 | 8.23  | 0 | 50 buccal muco   | 1 | 0 | 0    | 4   | 4   | 2 | 1 | 1 0000/00/00 | 0 | 2 | 1 |
| 1 | 15.87 | 0 | 55 buccal muco   | 1 | 0 | 0    | 4   | 4   | 2 | 0 | 1 0000/00/00 | 0 | 3 | 1 |
| 1 | 8.13  | 0 | 42 ant tongue    | 1 | 1 | 0    | 4   | 4   | 2 | 1 | 0 0000/00/00 | 0 | 3 | 1 |
| 1 | 83.21 | 1 | 51 buccal muco   | 1 | 1 | 0    | 1   | 1   | 0 | 0 | 0 0000/00/00 | 0 | 2 | 0 |
| 1 | 11.28 | 0 | 51 buccal muco   | 1 | 0 | 1    | 1   | 1 x | x |   | 0 0000/00/00 | 0 | 2 |   |
| 1 | 83.02 | 1 | 78 ant tongue    | 0 | 0 | 0    | 1   | 1 x | x |   | 0 0000/00/00 | 0 | 2 |   |
| 1 | 28.66 | 0 | 69 ant tongue    | 1 | 0 | 0    | 3   | 3   | 1 | 1 | 0 0000/00/00 | 0 | 2 | 1 |
| 1 | 8.69  | 0 | 53 buccal muco   | 0 | 0 | 0    | 4   | 2   | 2 | 1 | 0 2013/1/24  | 1 | 3 | 1 |
| 1 | 82.89 | 1 | 44 ant tongue    | 1 | 1 | 1    | 4   | 4   | 0 | 0 | 0 0000/00/00 | 0 | 2 | 0 |
| 1 | 83.02 | 1 | 36 ant tongue    | 1 | 1 | 1    | 1   | 1   | 0 | 0 | 0 0000/00/00 | 0 | 1 | 0 |
| 1 | 77.02 | 0 | 48 rmt           | 1 | 1 | 1    | 4   | 2   | 2 | 1 | 0 0000/00/00 | 0 | 2 | 1 |
| 1 | 84.36 | 1 | 63 alveolar ridg | 1 | 1 | 1    | 1   | 1   | 0 | 0 | 0 0000/00/00 | 0 | 2 | 0 |
| 1 | 18.00 | 0 | 74 hard palate   | 1 | 0 | 1    | 1   | 1 x | x |   | 0 2013/3/13  | 1 | 2 |   |
| 1 | 83.48 | 1 | 47 ant tongue    | 1 | 1 | 1    | 1   | 1 x | x |   | 0 0000/00/00 | 0 | 1 |   |
| 1 | 82.52 | 1 | 60 buccal muco   | 0 | 0 | 0    | 4   | 4   | 0 | 0 | 0 0000/00/00 | 0 | 2 | 0 |
| 1 | 81.11 | 0 | 55 alveolar ridg | 1 | 0 | 1 無法 | 1 x | x   |   |   | 0 2014/8/5   | 1 | 1 |   |
| 1 | 82.46 | 1 | 81 lip           | 1 | 0 | 0    | 1   | 1   | 0 | 0 | 0 0000/00/00 | 0 | 2 | 0 |
| 1 | 82.46 | 1 | 69 buccal muco   | 0 | 0 | 0    | 1   | 1   | 0 | 0 | 0 0000/00/00 | 0 | 2 | 0 |
| 1 | 82.95 | 1 | 41 hard palate   | 0 | 0 | 1    | 3   | 3   | 0 | 0 | 0 0000/00/00 | 0 | 2 | 0 |
| 1 | 83.41 | 1 | 56 buccal muco   | 0 | 0 | 0    | 4   | 4   | 0 | 0 | 0 0000/00/00 | 0 | 2 | 0 |
| 1 | 82.33 | 1 | 52 ant tongue    | 1 | 1 | 1    | 2   | 2   | 0 | 0 | 0 0000/00/00 | 0 | 2 | 0 |
| 1 | 55.70 | 0 | 65 buccal muco   | 1 | 1 | 0    | 3   | 3 x | x |   | 0 0000/00/00 | 0 | 1 |   |
| 1 | 11.31 | 0 | 67 ant tongue    | 0 | 0 | 0    | 1   | 1   | 0 | 0 | 0 2013/1/19  | 1 | 2 | 0 |
| 1 | 82.26 | 1 | 59 buccal muco   | 1 | 0 | 1    | 4   | 4   | 1 | 0 | 0 0000/00/00 | 0 | 2 | 1 |
| 1 | 83.11 | 1 | 55 rmt           | 1 | 1 | 0    | 2   | 2   | 0 | 0 | 0 2013/8/10  | 1 | 1 | 0 |
| 1 | 11.02 | 0 | 46 ant tongue    | 0 | 0 | 0    | 3   | 2   | 1 | 0 | 0 2013/1/25  | 1 | 2 | 1 |
| 1 | 82.52 | 1 | 65 buccal muco   | 0 | 0 | 0    | 1   | 1   | 0 | 0 | 0 2012/9/10  | 1 | 2 | 0 |
| 1 | 81.74 | 1 | 40 buccal muco   | 1 | 1 | 1    | 1   | 1   | 0 | 0 | 0 2013/9/26  | 1 | 2 | 0 |
| 1 | 81.64 | 1 | 50 rmt           | 1 | 1 | 1    | 4   | 4   | 0 | 0 | 0 0000/00/00 | 0 | 1 | 0 |
| 1 | 81.61 | 1 | 55 alveolar ridg | 1 | 0 | 0    | 4   | 4   | 0 | 0 | 0 0000/00/00 | 0 | 2 | 0 |
| 1 | 15.61 | 0 | 56 buccal muco   | 1 | 1 | 0    | 4   | 2   | 2 | 1 | 0 0000/00/00 | 0 | 2 | 1 |
| 1 | 50.46 | 0 | 79 ant tongue    | 0 | 0 | 0    | 2   | 2   | 0 | 0 | 0 2013/5/7   | 1 | 2 | 0 |
| 1 | 10.03 | 0 | 87 lip           | 1 | 0 | 0    | 2   | 2 x | x |   | 0 0000/00/00 | 0 | 2 |   |
| 1 | 81.34 | 1 | 60 buccal muco   | 1 | 1 | 1    | 1   | 1 x | x |   | 0 0000/00/00 | 0 | 2 |   |

|   |       |   |                   |   |   |   |   |     |   |   |   |            |   |   |   |
|---|-------|---|-------------------|---|---|---|---|-----|---|---|---|------------|---|---|---|
| 1 | 3.84  | 0 | 53 buccal muco    | 0 | 0 | 1 | 3 | 3   | 1 | 0 | 0 | 2012/9/28  | 1 | 3 | 1 |
| 1 | 81.28 | 1 | 42 buccal muco    | 0 | 0 | 0 | 2 | 2   | 0 | 0 | 0 | 0000/00/00 | 0 | 2 | 0 |
| 1 | 81.31 | 1 | 51 buccal muco    | 0 | 0 | 0 | 1 | 1 x | x | 0 | 0 | 2015/1/14  | 1 | 2 | 0 |
| 1 | 49.74 | 0 | 47 ant tongue     | 1 | 0 | 0 | 2 | 2   | 0 | 0 | 0 | 2014/5/13  | 1 | 3 | 0 |
| 1 | 81.15 | 1 | 61 alveolar ridge | 0 | 0 | 0 | 1 | 1   | 0 | 0 | 0 | 0000/00/00 | 0 | 1 | 0 |
| 1 | 65.31 | 0 | 61 buccal muco    | 0 | 0 | 0 | 3 | 1   | 1 | 1 | 0 | 0000/00/00 | 0 | 2 | 1 |
| 1 | 58.07 | 0 | 40 ant tongue     | 1 | 1 | 1 | 3 | 1   | 1 | 0 | 0 | 0000/00/00 | 0 | 2 | 1 |
| 1 | 0.82  | 0 | 69 ant tongue     | 1 | 0 | 0 | 1 | 1   | 0 | 0 | 0 | 0000/00/00 | 0 | 2 | 0 |
| 1 | 81.51 | 1 | 60 buccal muco    | 1 | 1 | 0 | 4 | 4   | 0 | 0 | 0 | 0000/00/00 | 0 | 2 | 0 |
| 1 | 80.79 | 1 | 53 lip            | 0 | 0 | 0 | 1 | 1 x | x | 0 | 0 | 0000/00/00 | 0 | 2 | 0 |
| 1 | 80.66 | 1 | 46 buccal muco    | 0 | 0 | 0 | 1 | 1   | 0 | 0 | 0 | 0000/00/00 | 0 | 2 | 0 |
| 1 | 29.08 | 0 | 64 buccal muco    | 1 | 1 | 1 | 3 | 3   | 0 | 0 | 0 | 0000/00/00 | 0 | 2 | 0 |
| 1 | 80.59 | 1 | 70 ant tongue     | 0 | 0 | 0 | 2 | 2   | 0 | 0 | 0 | 0000/00/00 | 0 | 2 | 0 |
| 1 | 80.56 | 1 | 65 mouth floor    | 1 | 1 | 1 | 4 | 4   | 2 | 1 | 0 | 0000/00/00 | 0 | 2 | 1 |
| 1 | 45.87 | 0 | 59 lip            | 0 | 0 | 0 | 4 | 4   | 0 | 0 | 0 | 0000/00/00 | 0 | 2 | 0 |
| 1 | 10.30 | 0 | 53 alveolar ridge | 1 | 0 | 0 | 4 | 4   | 0 | 0 | 0 | 2013/3/1   | 1 | 2 | 0 |
| 1 | 11.64 | 0 | 55 buccal muco    | 0 | 0 | 0 | 4 | 4   | 2 | 1 | 1 | 2013/2/20  | 1 | 2 | 1 |
| 1 | 80.33 | 1 | 56 alveolar ridge | 0 | 1 | 1 | 1 | 1 x | x | 0 | 1 | 0000/00/00 | 0 | 2 | 0 |
| 1 | 17.54 | 0 | 37 buccal muco    | 1 | 0 | 1 | 4 | 4   | 0 | 0 | 0 | 2013/2/12  | 1 | 1 | 0 |
| 1 | 26.23 | 0 | 59 buccal muco    | 1 | 1 | 1 | 1 | 1 x | x | 0 | 0 | 0000/00/00 | 0 | 2 | 0 |
| 1 | 41.02 | 0 | 62 ant tongue     | 1 | 1 | 1 | 2 | 2   | 0 | 0 | 0 | 0000/00/00 | 0 | 2 | 0 |
| 1 | 80.16 | 1 | 41 alveolar ridge | 0 | 1 | 0 | 2 | 2   | 0 | 0 | 0 | 0000/00/00 | 0 | 2 | 0 |
| 1 | 80.20 | 1 | 38 buccal muco    | 1 | 1 | 1 | 4 | 2   | 2 | 0 | 0 | 0000/00/00 | 0 | 3 | 1 |
| 1 | 10.85 | 0 | 71 ant tongue     | 1 | 1 | 1 | 1 | 1   | 0 | 0 | 0 | 2013/3/4   | 1 | 2 | 0 |
| 1 | 23.70 | 0 | 67 ant tongue     | 0 | 0 | 0 | 3 | 2   | 1 | 1 | 0 | 0000/00/00 | 0 | 2 | 1 |
| 1 | 48.39 | 0 | 58 lip            | 0 | 0 | 0 | 3 | 3   | 0 | 0 | 0 | 0000/00/00 | 0 | 1 | 0 |
| 1 | 20.62 | 0 | 65 alveolar ridge | 0 | 0 | 0 | 4 | 4   | 0 | 0 | 0 | 0000/00/00 | 0 | 2 | 0 |
| 1 | 47.48 | 0 | 51 ant tongue     | 1 | 0 | 1 | 1 | 1   | 0 | 0 | 0 | 0000/00/00 | 0 | 2 | 0 |
| 1 | 79.90 | 1 | 48 buccal muco    | 1 | 0 | 0 | 1 | 1   | 0 | 0 | 0 | 0000/00/00 | 0 | 2 | 0 |
| 1 | 80.59 | 1 | 59 buccal muco    | 0 | 0 | 0 | 1 | 1   | 0 | 0 | 0 | 0000/00/00 | 0 | 1 | 0 |
| 1 | 79.87 | 1 | 39 ant tongue     | 1 | 0 | 0 | 1 | 1   | 0 | 0 | 0 | 0000/00/00 | 0 | 2 | 0 |
| 1 | 18.30 | 0 | 48 ant tongue     | 1 | 0 | 0 | 3 | 1   | 1 | 0 | 0 | 2013/6/19  | 1 | 1 | 1 |
| 1 | 7.34  | 0 | 60 ant tongue     | 1 | 0 | 1 | 3 | 3   | 0 | 0 | 0 | 0000/00/00 | 0 | 3 | 0 |
| 1 | 81.31 | 1 | 67 alveolar ridge | 1 | 0 | 0 | 4 | 4   | 0 | 0 | 0 | 0000/00/00 | 0 | 2 | 0 |
| 1 | 33.21 | 0 | 50 ant tongue     | 1 | 1 | 0 | 2 | 2   | 0 | 0 | 0 | 0000/00/00 | 0 | 2 | 0 |
| 1 | 79.44 | 1 | 62 alveolar ridge | 1 | 1 | 0 | 4 | 4   | 0 | 0 | 0 | 0000/00/00 | 0 | 2 | 0 |
| 1 | 81.28 | 1 | 43 ant tongue     | 1 | 0 | 1 | 1 | 1   | 0 | 0 | 0 | 0000/00/00 | 0 | 3 | 0 |
| 1 | 79.48 | 1 | 59 buccal muco    | 1 | 1 | 1 | 1 | 1   | 0 | 0 | 0 | 0000/00/00 | 0 | 2 | 0 |
| 1 | 47.57 | 0 | 47 ant tongue     | 1 | 0 | 0 | 2 | 2   | 0 | 0 | 0 | 2016/2/11  | 1 | 3 | 0 |
| 1 | 44.89 | 0 | 49 buccal muco    | 1 | 0 | 1 | 4 | 4   | 0 | 0 | 0 | 0000/00/00 | 0 | 2 | 0 |
| 1 | 79.21 | 1 | 69 alveolar ridge | 1 | 1 | 0 | 4 | 4   | 2 | 1 | 1 | 0000/00/00 | 0 | 2 | 1 |
| 1 | 8.07  | 0 | 73 alveolar ridge | 1 | 1 | 1 | 4 | 4   | 2 | 0 | 0 | 0000/00/00 | 0 | 3 | 1 |
| 1 | 16.00 | 0 | 75 alveolar ridge | 0 | 0 | 0 | 4 | 4   | 2 | 1 | 0 | 2014/1/15  | 1 | 2 | 1 |
| 1 | 79.28 | 1 | 40 alveolar ridge | 1 | 0 | 0 | 1 | 1   | 0 | 0 | 0 | 0000/00/00 | 0 | 2 | 0 |
| 1 | 90.79 | 1 | 41 buccal muco    | 0 | 0 | 0 | 1 | 1 x | x | 0 | 0 | 0000/00/00 | 0 | 2 | 0 |
| 1 | 79.21 | 1 | 49 ant tongue     | 1 | 0 | 0 | 3 | 3   | 0 | 0 | 0 | 0000/00/00 | 0 | 2 | 0 |
| 1 | 79.54 | 1 | 45 lip            | 1 | 1 | 1 | 1 | 1 x | x | 0 | 0 | 2016/1/9   | 1 | 1 | 0 |
| 1 | 7.67  | 0 | 50 buccal muco    | 1 | 0 | 1 | 1 | 1   | 0 | 0 | 0 | 0000/00/00 | 0 | 2 | 0 |
| 1 | 78.98 | 1 | 62 alveolar ridge | 1 | 0 | 0 | 4 | 4   | 0 | 0 | 0 | 0000/00/00 | 0 | 1 | 0 |
| 1 | 78.98 | 1 | 67 lip            | 0 | 0 | 1 | 1 | 1 x | x | 0 | 0 | 0000/00/00 | 0 | 1 | 0 |
| 1 | 79.54 | 1 | 40 buccal muco    | 1 | 0 | 1 | 2 | 2   | 0 | 0 | 0 | 0000/00/00 | 0 | 2 | 0 |
| 1 | 31.08 | 0 | 50 rmt            | 0 | 0 | 0 | 4 | 4   | 0 | 0 | 0 | 0000/00/00 | 0 | 2 | 0 |
| 1 | 78.49 | 1 | 53 buccal muco    | 1 | 0 | 1 | 1 | 1   | 0 | 0 | 0 | 0000/00/00 | 0 | 1 | 0 |
| 1 | 6.39  | 0 | 63 alveolar ridge | 1 | 0 | 0 | 4 | 4   | 2 | 1 | 0 | 0000/00/00 | 0 | 2 | 1 |
| 1 | 78.36 | 1 | 46 ant tongue     | 1 | 0 | 1 | 1 | 1   | 0 | 0 | 0 | 0000/00/00 | 0 | 2 | 0 |
| 1 | 43.64 | 0 | 48 buccal muco    | 1 | 0 | 0 | 4 | 4   | 0 | 0 | 1 | 2014/5/8   | 1 | 1 | 0 |
| 1 | 78.30 | 1 | 56 buccal muco    | 0 | 0 | 0 | 4 | 4   | 0 | 0 | 0 | 0000/00/00 | 0 | 2 | 0 |
| 1 | 78.62 | 1 | 56 buccal muco    | 1 | 1 | 0 | 1 | 1 x | x | 0 | 0 | 0000/00/00 | 0 | 1 | 0 |
| 1 | 79.31 | 1 | 60 buccal muco    | 0 | 0 | 0 | 4 | 4   | 0 | 0 | 0 | 0000/00/00 | 0 | 1 | 0 |
| 1 | 78.79 | 1 | 44 ant tongue     | 0 | 0 | 1 | 2 | 2   | 0 | 0 | 0 | 0000/00/00 | 0 | 2 | 0 |
| 1 | 79.21 | 1 | 65 rmt            | 0 | 1 | 1 | 3 | 3   | 0 | 0 | 0 | 0000/00/00 | 0 | 2 | 0 |
| 1 | 29.80 | 0 | 50 alveolar ridge | 1 | 0 | 0 | 4 | 4   | 0 | 0 | 0 | 0000/00/00 | 0 | 2 | 0 |
| 1 | 78.36 | 1 | 56 lip            | 1 | 0 | 0 | 3 | 2   | 1 | 0 | 0 | 0000/00/00 | 0 | 1 | 1 |
| 1 | 6.20  | 0 | 49 alveolar ridge | 1 | 1 | 1 | 4 | 4   | 2 | 1 | 0 | 2013/5/7   | 1 | 2 | 1 |
| 1 | 77.97 | 1 | 44 ant tongue     | 1 | 0 | 1 | 4 | 4   | 0 | 0 | 0 | 0000/00/00 | 0 | 2 | 0 |
| 1 | 78.62 | 1 | 49 alveolar ridge | 1 | 1 | 1 | 4 | 4   | 0 | 0 | 0 | 0000/00/00 | 0 | 1 | 0 |
| 1 | 78.62 | 1 | 60 ant tongue     | 0 | 0 | 1 | 2 | 2   | 0 | 0 | 0 | 0000/00/00 | 0 | 2 | 0 |
| 1 | 36.82 | 0 | 70 ant tongue     | 1 | 1 | 1 | 2 | 2   | 0 | 0 | 0 | 0000/00/00 | 0 | 2 | 0 |
| 1 | 9.93  | 0 | 42 ant tongue     | 1 | 1 | 1 | 3 | 3   | 1 | 0 | 0 | 2013/5/27  | 1 | 2 | 1 |
| 1 | 77.90 | 1 | 69 lip            | 0 | 0 | 0 | 1 | 1   | 0 | 0 | 0 | 0000/00/00 | 0 | 1 | 0 |
| 1 | 40.03 | 0 | 72 alveolar ridge | 0 | 1 | 0 | 4 | 4   | 0 | 0 | 0 | 0000/00/00 | 0 | 2 | 0 |
| 1 | 78.13 | 0 | 61 buccal muco    | 0 | 1 | 1 | 4 | 4   | 1 | 0 | 0 | 2016/6/6   | 1 | 2 | 1 |

|   |       |   |                   |   |   |   |   |     |   |   |              |   |   |   |
|---|-------|---|-------------------|---|---|---|---|-----|---|---|--------------|---|---|---|
| 1 | 77.84 | 1 | 72 lip            | 0 | 0 | 0 | 1 | 1   | 0 | 0 | 0 0000/00/00 | 0 | 2 | 0 |
| 1 | 18.52 | 0 | 51 ant tongue     | 1 | 1 | 0 | 1 | 1   | 0 | 0 | 0 0000/00/00 | 0 | 2 | 0 |
| 1 | 2.43  | 0 | 61 buccal muco    | 0 | 0 | 0 | 4 | 4   | 0 | 0 | 0 0000/00/00 | 0 | 2 | 0 |
| 1 | 3.74  | 0 | 76 buccal muco    | 0 | 0 | 0 | 4 | 4   | 0 | 0 | 0 0000/00/00 | 0 | 2 | 0 |
| 1 | 77.48 | 1 | 54 alveolar ridge | 1 | 1 | 1 | 4 | 4   | 0 | 0 | 0 0000/00/00 | 0 | 2 | 0 |
| 1 | 21.05 | 0 | 51 ant tongue     | 1 | 0 | 0 | 2 | 2   | 0 | 0 | 0 2013/7/18  | 1 | 1 | 0 |
| 1 | 77.25 | 1 | 44 buccal muco    | 1 | 0 | 0 | 1 | 1   | 0 | 0 | 0 0000/00/00 | 0 | 2 | 0 |
| 1 | 77.15 | 1 | 51 alveolar ridge | 0 | 0 | 0 | 4 | 4   | 0 | 0 | 0 0000/00/00 | 0 | 2 | 0 |
| 1 | 38.20 | 0 | 48 ant tongue     | 1 | 0 | 0 | 1 | 1   | 0 | 0 | 0 2015/7/9   | 1 | 2 | 0 |
| 1 | 77.44 | 1 | 58 buccal muco    | 0 | 0 | 0 | 2 | 2   | 0 | 0 | 0 2014/2/12  | 1 | 2 | 0 |
| 1 | 44.98 | 0 | 64 ant tongue     | 0 | 0 | 1 | 1 | 1   | 0 | 0 | 0 0000/00/00 | 0 | 2 | 0 |
| 1 | 77.28 | 1 | 73 buccal muco    | 1 | 0 | 0 | 1 | 1 x | x |   | 0 2014/10/13 | 1 | 1 |   |
| 1 | 76.98 | 1 | 57 buccal muco    | 1 | 1 | 0 | 4 | 2   | 2 | 1 | 0 0000/00/00 | 0 | 2 | 1 |
| 1 | 76.92 | 1 | 67 alveolar ridge | 0 | 0 | 0 | 1 | 1 x | x |   | 0 0000/00/00 | 0 | 2 |   |
| 1 | 77.67 | 1 | 55 buccal muco    | 0 | 0 | 0 | 3 | 3   | 0 | 0 | 0 2013/12/6  | 1 | 2 | 0 |
| 1 | 78.30 | 1 | 53 alveolar ridge | 1 | 1 | 1 | 4 | 4   | 2 | 0 | 0 0000/00/00 | 0 | 2 | 1 |
| 1 | 77.51 | 1 | 48 buccal muco    | 0 | 0 | 0 | 1 | 1   | 0 | 0 | 0 0000/00/00 | 0 | 1 | 0 |
| 1 | 15.80 | 0 | 70 buccal muco    | 0 | 0 | 0 | 3 | 1   | 1 | 0 | 1 0000/00/00 | 0 | 2 | 1 |
| 1 | 24.85 | 0 | 48 alveolar ridge | 1 | 0 | 0 | 4 | 2   | 2 | 0 | 0 2014/2/20  | 1 | 2 | 1 |
| 1 | 48.89 | 0 | 69 alveolar ridge | 0 | 0 | 0 | 1 | 1 x | x |   | 0 2013/8/14  | 1 | 1 |   |
| 1 | 24.49 | 0 | 48 alveolar ridge | 1 | 0 | 1 | 4 | 4   | 0 | 0 | 0 0000/00/00 | 0 | 2 | 0 |
| 1 | 18.75 | 0 | 45 buccal muco    | 1 | 1 | 1 | 4 | 4   | 2 | 0 | 0 0000/00/00 | 0 | 2 | 1 |
| 1 | 76.36 | 1 | 54 buccal muco    | 0 | 0 | 0 | 1 | 1 x | x |   | 0 0000/00/00 | 0 | 1 |   |
| 1 | 77.70 | 1 | 73 alveolar ridge | 1 | 1 | 0 | 2 | 2   | 0 | 0 | 0 0000/00/00 | 0 | 1 | 0 |
| 1 | 8.98  | 0 | 52 ant tongue     | 1 | 1 | 1 | 4 | 4   | 2 | 1 | 0 2013/6/25  | 1 | 2 | 1 |
| 1 | 78.16 | 1 | 53 buccal muco    | 0 | 0 | 0 | 1 | 1 x | x |   | 0 2016/3/29  | 1 | 2 |   |
| 1 | 6.26  | 0 | 46 ant tongue     | 1 | 1 |   | 4 | 4   | 2 | 1 | 0 0000/00/00 | 0 | 2 | 1 |
| 1 | 13.02 | 0 | 46 alveolar ridge | 1 | 0 | 0 | 4 | 3   | 2 | 1 | 0 2013/8/13  | 1 | 2 | 1 |
| 1 | 76.49 | 1 | 47 buccal muco    | 1 | 1 | 0 | 1 | 4   | 0 | 0 | 0 0000/00/00 | 0 | 3 | 0 |
| 1 | 17.87 | 0 | 54 ant tongue     | 1 | 1 | 1 | 1 | 1   | 0 | 0 | 0 0000/00/00 | 0 | 2 | 0 |
| 1 | 76.26 | 1 | 47 buccal muco    | 0 | 0 | 0 | 1 | 1 x | x |   | 0 2013/3/9   | 1 | 2 |   |
| 1 | 54.98 | 0 | 70 alveolar ridge | 1 | 0 | 0 | 1 | 1   | 0 | 0 | 0 0000/00/00 | 0 | 2 | 0 |
| 1 | 76.00 | 1 | 54 buccal muco    | 1 | 1 | 1 | 2 | 2   | 0 | 0 | 0 0000/00/00 | 0 | 1 | 0 |
| 1 | 76.03 | 1 | 73 buccal muco    | 0 | 0 | 0 | 2 | 2   | 0 | 0 | 0 0000/00/00 | 0 | 2 | 0 |
| 1 | 11.48 | 0 | 40 alveolar ridge | 0 | 1 | 0 | 4 | 4 x | x |   | 1 0000/00/00 | 0 | 2 |   |
| 1 | 75.77 | 1 | 65 ant tongue     | 1 | 0 | 0 | 1 | 1   | 0 | 0 | 0 0000/00/00 | 0 | 1 | 0 |
| 1 | 77.11 | 1 | 60 buccal muco    | 1 | 1 | 0 | 1 | 1   | 0 | 0 | 0 0000/00/00 | 0 | 1 | 0 |
| 1 | 75.67 | 1 | 60 lip            | 0 | 0 | 0 | 1 | 1   | 0 | 0 | 0 0000/00/00 | 0 | 2 | 0 |
| 1 | 11.25 | 0 | 64 alveolar ridge | 0 | 0 | 0 | 4 | 4   | 0 | 0 | 0 0000/00/00 | 0 | 2 | 0 |
| 1 | 78.72 | 1 | 60 buccal muco    | 1 | 0 | 0 | 2 | 2   | 0 | 0 | 0 0000/00/00 | 0 | 2 | 0 |
| 1 | 55.74 | 0 | 64 buccal muco    | 1 | 0 | 0 | 1 | 1   | 0 | 0 | 0 0000/00/00 | 0 | 1 | 0 |
| 1 | 75.34 | 0 | 62 ant tongue     | 0 | 0 | 0 | 2 | 2   | 0 | 0 | 0 0000/00/00 | 0 | 2 | 0 |
| 1 | 76.10 | 1 | 50 alveolar ridge | 1 | 1 | 1 | 4 | 4   | 0 | 0 | 0 2018/3/7   | 1 | 2 | 0 |
| 1 | 15.25 | 0 | 74 buccal muco    | 1 | 1 | 0 | 4 | 3   | 2 | 1 | 0 2013/1/1/6 | 1 | 3 | 1 |
| 1 | 75.31 | 1 | 52 rmt            | 0 | 0 | 0 | 1 | 1 x | x |   | 0 0000/00/00 | 0 | 2 |   |
| 1 | 35.38 | 0 | 44 ant tongue     | 1 | 1 |   | 4 | 4   | 2 | 1 | 1 0000/00/00 | 0 | 2 | 1 |
| 1 | 58.07 | 0 | 61 lip            | 1 | 0 | 0 | 1 | 1   | 0 | 0 | 0 0000/00/00 | 0 | 2 | 0 |
| 1 | 75.28 | 1 | 63 buccal muco    | 1 | 0 | 0 | 4 | 4   | 0 | 0 | 0 0000/00/00 | 0 | 2 | 0 |
| 1 | 75.11 | 1 | 62 alveolar ridge | 1 | 1 | 1 | 4 | 4 x | x |   | 0 0000/00/00 | 0 | 2 |   |
| 1 | 74.98 | 1 | 61 ant tongue     | 1 | 0 | 1 | 1 | 1   | 0 | 0 | 0 0000/00/00 | 0 | 2 | 0 |
| 1 | 74.89 | 1 | 52 alveolar ridge | 1 | 0 | 1 | 4 | 4   | 2 | 0 | 0 0000/00/00 | 0 | 2 | 1 |
| 1 | 75.87 | 1 | 39 buccal muco    | 0 | 0 | 0 | 2 | 2   | 0 | 0 | 0 0000/00/00 | 0 | 2 | 0 |
| 1 | 33.21 | 0 | 43 buccal muco    | 1 | 0 |   | 2 | 2   | 0 | 0 | 0 2013/5/27  | 1 | 2 | 0 |
| 1 | 74.98 | 1 | 51 buccal muco    | 1 | 0 | 1 | 2 | 2   | 0 | 0 | 0 0000/00/00 | 0 | 2 | 0 |
| 1 | 34.69 | 0 | 69 lip            | 1 | 0 | 0 | 1 | 1   | 0 | 0 | 0 2015/8/27  | 1 | 2 | 0 |
| 1 | 74.46 | 1 | 55 mouth floor    | 1 | 1 | 1 | 1 | 1   | 0 | 0 | 0 2016/11/23 | 1 | 2 | 0 |
| 1 | 74.49 | 1 | 52 buccal muco    | 1 | 0 | 1 | 1 | 1 x | x |   | 0 0000/00/00 | 0 | 1 |   |
| 1 | 74.39 | 1 | 52 lip            | 1 | 1 | 1 | 4 | 4   | 0 | 0 | 0 0000/00/00 | 0 | 2 | 0 |
| 1 | 34.56 | 0 | 76 ant tongue     | 1 | 0 | 1 | 4 | 4   | 0 | 0 | 0 0000/00/00 | 0 | 2 | 0 |
| 1 | 42.26 | 0 | 69 buccal muco    | 1 | 1 | 1 | 2 | 2   | 0 | 0 | 0 0000/00/00 | 0 | 1 | 0 |
| 1 | 2.89  | 0 | 46 buccal muco    | 1 | 1 | 1 | 4 | 4   | 2 | 1 | 0 2013/5/6   | 1 | 2 | 1 |
| 1 | 74.26 | 1 | 51 ant tongue     | 1 | 0 | 1 | 4 | 4   | 2 | 1 | 0 0000/00/00 | 0 | 2 | 1 |
| 1 | 74.43 | 1 | 57 buccal muco    | 1 | 0 | 0 | 4 | 4   | 0 | 0 | 0 0000/00/00 | 0 | 2 | 0 |
| 1 | 75.15 | 1 | 77 mouth floor    | 0 | 0 | 0 | 1 | 1   | 0 | 0 | 0 0000/00/00 | 0 | 2 | 0 |
| 1 | 74.16 | 1 | 45 ant tongue     | 1 | 1 |   | 1 | 1   | 0 | 0 | 0 0000/00/00 | 0 | 2 | 0 |
| 1 | 30.49 | 0 | 40 ant tongue     | 0 | 0 | 0 | 3 | 2   | 1 | 0 | 0 2015/9/9   | 1 | 2 | 1 |
| 1 | 32.39 | 0 | 40 mouth floor    | 1 | 0 | 1 | 1 | 1   | 0 | 0 | 0 2015/4/30  | 1 | 2 | 0 |
| 1 | 74.66 | 1 | 52 ant tongue     | 1 | 0 | 1 | 1 | 1   | 0 | 0 | 0 0000/00/00 | 0 | 2 | 0 |
| 1 | 74.39 | 1 | 52 buccal muco    | 0 | 0 | 0 | 2 | 2   | 0 | 0 | 0 2016/12/16 | 1 | 2 | 0 |
| 1 | 74.03 | 1 | 60 alveolar ridge | 1 | 1 | 0 | 1 | 1   | 0 | 0 | 0 0000/00/00 | 0 | 2 | 0 |
| 1 | 17.97 | 0 | 50 ant tongue     | 1 | 0 | 1 | 1 | 1   | 0 | 0 | 0 2014/5/5   | 1 | 1 | 0 |
| 1 | 74.59 | 1 | 52 hard palate    | 1 | 0 | 1 | 3 | 3   | 0 | 0 | 0 0000/00/00 | 0 | 1 | 0 |

|   |       |   |                   |   |   |    |   |     |   |   |             |   |   |   |
|---|-------|---|-------------------|---|---|----|---|-----|---|---|-------------|---|---|---|
| 1 | 76.26 | 1 | 68 lip            | 0 | 0 | 1  | 1 | 1 x | x | 0 | 0000/00/00  | 0 | 2 |   |
| 1 | 30.16 | 0 | 69 alveolar ridgr | 1 | 0 | 0  | 2 | 2   | 0 | 0 | 2015/6/8    | 1 | 1 | 0 |
| 1 | 34.36 | 0 | 54 ant tongue     | 0 | 0 | 0  | 4 | 4   | 2 | 0 | 0000/00/00  | 0 | 2 | 1 |
| 1 | 5.70  | 0 | 64 buccal muco    | 0 | 0 | 0  | 3 | 3   | 0 | 0 | 2013/8/6    | 1 | 2 | 0 |
| 1 | 85.48 | 1 | 43 ant tongue     | 1 | 1 | 1  | 1 | 1   | 0 | 0 | 0000/00/00  | 0 | 2 | 0 |
| 1 | 22.72 | 0 | 59 alveolar ridgr | 1 | 0 | 0  | 4 | 4   | 1 | 0 | 0000/00/00  | 0 | 2 | 1 |
| 1 | 73.77 | 1 | 63 mouth floor    | 1 | 0 | 0  | 1 | 1   | 0 | 0 | 0000/00/00  | 0 | 2 | 0 |
| 1 | 10.20 | 0 | 49 buccal muco    | 1 | 1 | 1  | 4 | 4   | 0 | 0 | 10000/00/00 | 0 | 1 | 0 |
| 1 | 74.23 | 1 | 49 buccal muco    | 1 | 1 | 0  | 4 | 2   | 2 | 1 | 0000/00/00  | 0 | 2 | 1 |
| 1 | 73.61 | 1 | 45 buccal muco    | 0 | 0 | 1  | 3 | 1   | 1 | 1 | 0000/00/00  | 0 | 2 | 1 |
| 1 | 73.80 | 1 | 52 buccal muco    | 0 | 0 | 0  | 2 | 2   | 0 | 0 | 0000/00/00  | 0 | 2 | 0 |
| 1 | 32.26 | 0 | 73 buccal muco    | 1 | 1 | 0  | 3 | 1   | 1 | 1 | 2015/10/15  | 1 | 2 | 1 |
| 1 | 16.43 | 0 | 39 ant tongue     | 0 | 0 | 0  | 4 | 2   | 2 | 1 | 2014/4/26   | 1 | 2 | 1 |
| 1 | 74.23 | 1 | 78 lip            | 0 | 0 | 1  | 1 | 1 x | x |   | 0000/00/00  | 0 | 1 |   |
| 1 | 73.51 | 1 | 46 ant tongue     | 0 | 1 | 1  | 1 | 1   | 0 | 0 | 0000/00/00  | 0 | 2 | 0 |
| 1 | 73.31 | 1 | 57 ant tongue     | 1 | 0 | 0  | 1 | 1   | 0 | 0 | 0000/00/00  | 0 | 1 | 0 |
| 1 | 63.18 | 0 | 78 alveolar ridgr | 1 | 0 | 0  | 4 | 4   | 0 | 0 | 2017/10/3   | 1 | 1 | 0 |
| 1 | 73.70 | 1 | 43 ant tongue     | 1 | 0 | 0  | 1 | 1 x | x |   | 0000/00/00  | 0 | 3 |   |
| 1 | 73.31 | 1 | 62 rmt            | 1 | 1 | 0  | 4 | 4   | 0 | 0 | 0000/00/00  | 0 | 2 | 0 |
| 1 | 73.48 | 1 | 40 buccal muco    | 1 | 0 | 1  | 4 | 4   | 2 | 1 | 0000/00/00  | 0 | 2 | 1 |
| 1 | 20.30 | 0 | 59 rmt            | 1 | 1 | 0  | 4 | 4   | 2 | 1 | 0000/00/00  | 0 | 2 | 1 |
| 1 | 27.21 | 0 | 69 buccal muco    | 1 | 1 | 0  | 1 | 1 x | x |   | 0000/00/00  | 0 | 2 |   |
| 1 | 72.89 | 1 | 57 buccal muco    | 0 | 0 | 1  | 4 | 4   | 1 | 1 | 0000/00/00  | 0 | 2 | 1 |
| 1 | 34.20 | 0 | 48 buccal muco    | 1 | 1 | 0  | 1 | 1   | 0 | 0 | 2014/5/19   | 1 | 2 | 0 |
| 1 | 76.56 | 1 | 62 alveolar ridgr | 0 | 0 | 0  | 1 | 1   | 0 | 0 | 0000/00/00  | 0 | 1 | 0 |
| 1 | 72.85 | 1 | 49 ant tongue     | 1 | 0 | 1  | 3 | 3   | 1 | 0 | 0000/00/00  | 0 | 2 | 1 |
| 1 | 72.92 | 1 | 64 buccal muco    | 0 | 0 | 0  | 4 | 2   | 2 | 1 | 0000/00/00  | 0 | 2 | 1 |
| 1 | 74.49 | 1 | 79 buccal muco    | 1 | 0 | 0  | 1 | 1   | 0 | 0 | 0000/00/00  | 0 | 1 | 0 |
| 1 | 38.23 | 0 | 44 ant tongue     | 0 | 0 | 0  | 1 | 1   | 0 | 0 | 0000/00/00  | 0 | 2 | 0 |
| 1 | 72.75 | 1 | 61 ant tongue     | 1 | 1 | 無法 |   | 1 x | x |   | 0000/00/00  | 0 | 1 |   |
| 1 | 72.69 | 1 | 54 buccal muco    | 1 | 1 |    | 4 | 2   | 2 | 1 | 0000/00/00  | 0 | 2 | 1 |
| 1 | 72.69 | 1 | 52 buccal muco    | 0 | 0 | 0  | 2 | 2   | 0 | 0 | 0000/00/00  | 0 | 2 | 0 |
| 1 | 73.15 | 1 | 57 buccal muco    | 1 | 1 | 1  | 3 | 3   | 0 | 0 | 0000/00/00  | 0 | 1 | 0 |
| 1 | 72.56 | 1 | 66 ant tongue     | 1 | 1 | 1  | 4 | 4   | 2 | 1 | 0000/00/00  | 0 | 2 | 1 |
| 1 | 73.08 | 1 | 52 mouth floor    | 1 | 1 | 0  | 2 | 2   | 0 | 0 | 0000/00/00  | 0 | 2 | 0 |
| 1 | 30.56 | 0 | 50 ant tongue     | 1 | 0 | 0  | 3 | 1   | 1 | 0 | 2014/4/29   | 1 | 1 | 1 |
| 1 | 72.59 | 1 | 50 alveolar ridgr | 1 | 0 | 1  | 4 | 4   | 0 | 0 | 0000/00/00  | 0 | 2 | 0 |
| 1 | 18.49 | 0 | 48 ant tongue     | 1 | 1 | 1  | 2 | 2   | 0 | 0 | 2014/5/13   | 1 | 2 | 0 |
| 1 | 52.26 | 0 | 69 hard palate    | 0 | 1 | 0  | 4 | 4 x | x |   | 2017/2/10   | 1 | 2 |   |
| 1 | 72.69 | 1 | 70 ant tongue     | 1 | 1 | 1  | 1 | 1 x | x |   | 0000/00/00  | 0 | 2 |   |
| 1 | 72.33 | 1 | 51 buccal muco    | 1 | 0 | 0  | 4 | 4   | 2 | 1 | 0000/00/00  | 0 | 2 | 1 |
| 1 | 72.46 | 1 | 47 ant tongue     | 1 | 1 | 1  | 2 | 2   | 0 | 0 | 0000/00/00  | 0 | 2 | 0 |
| 1 | 25.80 | 0 | 55 ant tongue     | 1 | 1 | 1  | 1 | 1 x | x |   | 0000/00/00  | 0 | 2 |   |
| 1 | 53.15 | 0 | 40 ant tongue     | 1 | 1 | 0  | 2 | 2   | 0 | 0 | 0000/00/00  | 0 | 2 | 0 |
| 1 | 27.11 | 0 | 57 buccal muco    | 1 | 0 | 0  | 2 | 2 x | x |   | 0000/00/00  | 0 | 1 |   |
| 1 | 71.97 | 1 | 73 buccal muco    | 0 | 0 | 0  | 1 | 1   | 0 | 0 | 2015/2/4    | 1 | 2 | 0 |
| 1 | 72.30 | 1 | 55 ant tongue     | 1 | 1 |    | 1 | 1   | 0 | 0 | 0000/00/00  | 0 | 2 | 0 |
| 1 | 71.97 | 1 | 69 ant tongue     | 0 | 0 | 0  | 1 | 1 x | x |   | 0000/00/00  | 0 | 2 |   |
| 1 | 71.87 | 1 | 63 buccal muco    | 0 | 0 | 1  | 2 | 2   | 0 | 0 | 0000/00/00  | 0 | 2 | 0 |
| 1 | 4.07  | 0 | 67 hard palate    | 0 | 0 | 0  | 2 | 2 x | x |   | 0000/00/00  | 0 | 2 |   |
| 1 | 42.46 | 0 | 72 ant tongue     | 0 | 0 | 0  | 2 | 2   | 0 | 0 | 0000/00/00  | 0 | 3 | 0 |
| 1 | 71.64 | 1 | 68 alveolar ridgr | 1 | 1 | 1  | 4 | 4 x | x |   | 0000/00/00  | 0 | 1 |   |
| 1 | 71.93 | 1 | 59 alveolar ridgr | 0 | 0 | 0  | 1 | 1 x | x |   | 0000/00/00  | 0 | 2 |   |
| 1 | 6.89  | 0 | 66 alveolar ridgr | 1 | 0 | 1  | 4 | 4   | 2 | 1 | 0000/00/00  | 0 | 2 | 1 |
| 1 | 7.44  | 0 | 62 buccal muco    | 0 | 0 | 0  | 4 | 4 x | x |   | 0000/00/00  | 0 | 2 |   |
| 1 | 71.41 | 1 | 53 rmt            | 1 | 0 | 0  | 2 | 2 x | x |   | 0000/00/00  | 0 | 2 |   |
| 1 | 38.79 | 0 | 72 alveolar ridgr | 1 | 1 | 0  | 1 | 1   | 0 | 0 | 0000/00/00  | 0 | 2 | 0 |
| 1 | 71.21 | 1 | 44 lip            | 1 | 1 | 1  | 2 | 2   | 0 | 0 | 0000/00/00  | 0 | 2 | 0 |
| 1 | 71.70 | 1 | 81 buccal muco    | 1 | 1 | 0  | 4 | 2   | 2 | 1 | 0000/00/00  | 0 | 2 | 1 |
| 1 | 71.15 | 1 | 61 buccal muco    | 1 | 1 | 1  | 1 | 1 x | x |   | 2014/9/13   | 1 | 2 |   |
| 1 | 71.05 | 1 | 55 alveolar ridgr | 1 | 1 | 1  | 1 | 1 x | x |   | 0000/00/00  | 0 | 2 |   |
| 1 | 70.85 | 1 | 60 alveolar ridgr | 0 | 0 | 0  | 4 | 4   | 2 | 1 | 0000/00/00  | 0 | 1 | 1 |
| 1 | 18.56 | 0 | 67 mouth floor    | 0 | 0 | 0  | 2 | 2 x | x |   | 2013/12/4   | 1 | 2 |   |
| 1 | 49.64 | 0 | 70 buccal muco    | 1 | 0 | 無法 |   | 1 x |   | 0 | 0000/00/00  | 0 | 2 |   |
| 1 | 70.62 | 1 | 51 mouth floor    | 0 | 0 | 0  | 1 | 1   | 0 | 0 | 0000/00/00  | 0 | 2 | 0 |
| 1 | 70.62 | 1 | 53 alveolar ridgr | 1 | 1 | 0  | 1 | 1   | 0 | 0 | 0000/00/00  | 0 | 2 | 0 |
| 1 | 6.92  | 0 | 52 buccal muco    | 1 | 1 | 0  | 4 | 4 x | x |   | 2013/10/9   | 1 | 2 |   |
| 1 | 70.59 | 1 | 48 ant tongue     | 1 | 1 | 0  | 1 | 1   | 0 | 0 | 0000/00/00  | 0 | 2 | 0 |
| 1 | 71.15 | 1 | 63 ant tongue     | 1 | 1 | 1  | 2 | 2   | 0 | 0 | 0000/00/00  | 0 | 1 | 0 |
| 1 | 70.39 | 1 | 74 ant tongue     | 0 | 0 | 0  | 2 | 2 x | x |   | 0000/00/00  | 0 | 2 |   |
| 1 | 70.23 | 0 | 75 buccal muco    | 1 | 1 | 0  | 4 | 4   | 0 | 0 | 0000/00/00  | 0 | 1 | 0 |
| 1 | 6.20  | 0 | 53 ant tongue     | 1 | 1 | 0  | 4 | 4   | 2 | 1 | 2013/11/1   | 1 | 2 | 1 |

|   |       |   |                  |   |   |    |   |     |   |   |             |             |   |   |   |
|---|-------|---|------------------|---|---|----|---|-----|---|---|-------------|-------------|---|---|---|
| 1 | 70.16 | 1 | 49 lip           | 1 | 1 | 1  | 2 | 2 x | x | 0 | 0000/00/00  | 0           | 1 |   |   |
| 1 | 70.03 | 1 | 52 lip           | 1 | 0 | 1  | 4 | 4   | 1 | 0 | 0000/00/00  | 0           | 2 | 1 |   |
| 1 | 70.59 | 1 | 37 buccal muco   | 1 | 1 | 0  | 1 | 1   | 0 | 0 | 0           | 2013/10/11  | 1 | 1 | 0 |
| 1 | 46.36 | 0 | 68 ant tongue    | 1 | 1 | 0  | 2 | 2   | 0 | 0 | 0           | 2014/9/10   | 1 | 2 | 0 |
| 1 | 69.67 | 1 | 64 hard palate   | 0 | 0 | 0  | 4 | 4   | 0 | 0 | 0000/00/00  | 0           | 2 | 0 |   |
| 1 | 70.16 | 1 | 66 buccal muco   | 1 | 1 | 0  | 2 | 2   | 0 | 0 | 0000/00/00  | 0           | 2 | 0 |   |
| 1 | 42.10 | 0 | 33 alveolar ridg | 1 | 0 | 1  | 1 | 1   | 0 | 0 | 0000/00/00  | 0           | 2 | 0 |   |
| 1 | 69.61 | 1 | 60 ant tongue    | 0 | 0 | 1  | 1 | 1 x | x | 0 | 0           | 2014/4/3    | 1 | 2 |   |
| 1 | 69.44 | 1 | 56 buccal muco   | 0 | 0 | 0  | 1 | 1 x | x | 0 | 0           | 2014/1/24   | 1 | 2 |   |
| 1 | 81.61 | 0 | 40 ant tongue    | 1 | 0 | 1  | 1 | 1   | 0 | 0 | 0000/00/00  | 0           | 2 | 0 |   |
| 1 | 69.70 | 1 | 44 buccal muco   | 1 | 1 | 0  | 1 | 1   | 0 | 0 | 0000/00/00  | 0           | 2 | 0 |   |
| 1 | 69.84 | 1 | 71 buccal muco   | 0 | 0 | 0  | 1 | 1   | 0 | 0 | 0000/00/00  | 0           | 1 | 0 |   |
| 1 | 69.31 | 1 | 38 rmt           | 1 | 1 |    | 2 | 2   | 0 | 0 | 0000/00/00  | 0           | 2 | 0 |   |
| 1 | 70.23 | 1 | 53 ant tongue    | 1 | 1 | 1  | 2 | 2   | 0 | 0 | 0000/00/00  | 0           | 2 | 0 |   |
| 1 | 69.18 | 1 | 58 lip           | 0 | 0 | 0  | 3 | 1   | 1 | 1 | 0000/00/00  | 0           | 2 | 1 |   |
| 1 | 69.67 | 1 | 62 ant tongue    | 1 | 1 | 0  | 2 | 2   | 0 | 0 | 0000/00/00  | 0           | 2 | 0 |   |
| 1 | 69.80 | 1 | 45 ant tongue    | 1 | 0 | 1  | 1 | 1 x | x | 0 | 0000/00/00  | 0           | 2 |   |   |
| 1 | 69.15 | 1 | 40 ant tongue    | 1 | 1 | 0  | 1 | 1   | 0 | 0 | 0000/00/00  | 0           | 2 | 0 |   |
| 1 | 8.82  | 0 | 76 buccal muco   | 0 | 0 | 0  | 1 | 1 x | x | 0 | 0           | 2013/10/2   | 1 | 1 |   |
| 1 | 68.95 | 1 | 74 lip           | 1 | 1 | 0  | 4 | 3   | 2 | 1 | 0           | 2013/1/1/6  | 1 | 3 | 1 |
| 1 | 11.70 | 0 | 44 buccal muco   | 1 | 1 | 1  | 3 | 3   | 0 | 0 | 0000/00/00  | 0           | 2 | 0 |   |
| 1 | 68.69 | 1 | 61 hard palate   | 0 | 0 | 0  | 1 | 1 x | x | 0 | 0           | 2014/3/27   | 1 | 1 |   |
| 1 | 68.72 | 1 | 57 ant tongue    | 1 | 0 | 0  | 1 | 1   | 0 | 0 | 0000/00/00  | 0           | 2 | 0 |   |
| 1 | 68.66 | 1 | 56 buccal muco   | 0 | 0 | 0  | 2 | 2   | 0 | 0 | 0000/00/00  | 0           | 2 | 0 |   |
| 1 | 69.25 | 1 | 62 buccal muco   | 0 | 0 | 0  | 2 | 2   | 0 | 0 | 0000/00/00  | 0           | 2 | 0 |   |
| 1 | 57.05 | 0 | 46 buccal muco   | 1 | 0 | 1  | 1 | 1 x | x | 0 | 0000/00/00  | 0           | 1 |   |   |
| 1 | 8.23  | 0 | 62 alveolar ridg | 1 | 0 | 0  | 4 | 4   | 0 | 0 | 0           | 2017/8/17   | 1 | 1 | 0 |
| 1 | 69.61 | 1 | 53 ant tongue    | 1 | 0 | 0  | 4 | 4   | 2 | 1 | 0000/00/00  | 0           | 2 | 1 |   |
| 1 | 26.20 | 0 | 55 buccal muco   | 1 | 1 | 1  | 1 | 1   | 0 | 0 | 0000/00/00  | 0           | 3 | 0 |   |
| 1 | 68.49 | 1 | 54 buccal muco   | 1 | 1 | 1  | 4 | 2   | 2 | 1 | 0           | 2014/1/1/14 | 1 | 2 | 1 |
| 1 | 5.38  | 0 | 56 buccal muco   | 1 | 1 | 0  | 1 | 1 x | x | 0 | 0000/00/00  | 0           | 1 |   |   |
| 1 | 52.79 | 0 | 61 ant tongue    | 1 | 1 | 1  | 4 | 2   | 2 | 1 | 0           | 2014/2/14   | 1 | 2 | 1 |
| 1 | 54.66 | 0 | 43 buccal muco   | 1 | 0 | 1  | 3 | 1   | 1 | 0 | 0000/00/00  | 0           | 2 | 1 |   |
| 1 | 68.59 | 1 | 39 buccal muco   | 1 | 1 | 1  | 4 | 4   | 1 | 0 | 0           | 2016/7/4    | 1 | 2 | 1 |
| 1 | 22.92 | 0 | 67 buccal muco   | 1 | 1 | 1  | 4 | 4   | 0 | 0 | 0000/00/00  | 0           | 2 | 0 |   |
| 1 | 68.30 | 1 | 45 mouth floor   | 1 | 0 | 0  | 1 | 1 x | x | 0 | 0000/00/00  | 0           | 3 |   |   |
| 1 | 68.26 | 1 | 53 buccal muco   | 1 | 0 | 1  | 3 | 3   | 0 | 0 | 0000/00/00  | 0           | 2 | 0 |   |
| 1 | 68.49 | 1 | 44 buccal muco   | 0 | 1 | 1  | 1 | 1   | 0 | 0 | 0000/00/00  | 0           | 2 | 0 |   |
| 1 | 67.87 | 1 | 53 lip           | 1 | 0 | 0  | 2 | 2   | 0 | 0 | 0000/00/00  | 0           | 1 | 0 |   |
| 1 | 67.93 | 1 | 49 ant tongue    | 1 | 1 | 0  | 1 | 1 x | x | 0 | 0000/00/00  | 0           | 2 |   |   |
| 1 | 9.41  | 0 | 65 ant tongue    | 0 | 0 | 0  | 4 | 3   | 2 | 0 | 0000/00/00  | 0           | 2 | 1 |   |
| 1 | 67.57 | 1 | 47 ant tongue    | 0 | 1 |    | 4 | 1   | 2 | 1 | 0           | 2014/3/24   | 1 | 2 | 1 |
| 1 | 67.74 | 1 | 48 mouth floor   | 1 | 0 | 1  | 1 | 1   | 0 | 0 | 0000/00/00  | 0           | 2 | 0 |   |
| 1 | 67.74 | 1 | 53 ant tongue    | 1 | 1 | 1  | 4 | 2   | 2 | 0 | 0000/00/00  | 0           | 3 | 1 |   |
| 1 | 67.51 | 1 | 67 buccal muco   | 1 | 0 | 0  | 1 | 1 x | x | 0 | 0000/00/00  | 0           | 1 |   |   |
| 1 | 67.84 | 1 | 48 rmt           | 1 | 0 | 0  | 4 | 4 x | x | 0 | 10000/00/00 | 0           | 2 |   |   |
| 1 | 67.51 | 1 | 54 ant tongue    | 1 | 1 | 1  | 1 | 1   | 0 | 0 | 0           | 2014/5/23   | 1 | 2 | 0 |
| 1 | 15.93 | 0 | 52 ant tongue    | 1 | 0 |    | 4 | 2   | 2 | 0 | 0000/00/00  | 0           | 2 | 1 |   |
| 1 | 34.62 | 0 | 62 lip           | 1 | 0 | 0  | 3 | 2   | 1 | 0 | 0           | 2014/8/20   | 1 | 2 | 1 |
| 1 | 67.18 | 1 | 43 lip           | 1 | 1 | 無法 |   | 1 x | x | 0 | 0000/00/00  | 0           | 1 |   |   |
| 1 | 67.18 | 1 | 41 ant tongue    | 1 | 1 | 0  | 1 | 1   | 0 | 0 | 0000/00/00  | 0           | 2 | 0 |   |
| 1 | 67.31 | 1 | 54 ant tongue    | 1 | 0 | 0  | 1 | 1   | 0 | 0 | 0000/00/00  | 0           | 1 | 0 |   |
| 1 | 67.97 | 1 | 44 lip           | 1 | 1 | 1  | 2 | 2 x | x | 0 | 0000/00/00  | 0           | 2 |   |   |
| 1 | 67.31 | 1 | 36 ant tongue    | 0 | 0 | 0  | 1 | 1 x | x | 0 | 0000/00/00  | 0           | 2 |   |   |
| 1 | 67.11 | 1 | 68 buccal muco   | 1 | 1 |    | 1 | 1 x | x | 0 | 0000/00/00  | 0           | 1 |   |   |
| 1 | 67.05 | 1 | 58 ant tongue    | 0 | 1 | 0  | 2 | 2   | 0 | 0 | 0000/00/00  | 0           | 1 | 0 |   |
| 1 | 3.28  | 0 | 62 lip           | 1 | 0 |    | 4 | 4   | 0 | 0 | 0000/00/00  | 0           | 1 | 0 |   |
| 1 | 41.93 | 0 | 80 buccal muco   | 0 | 0 | 0  | 1 | 1   | 0 | 0 | 0000/00/00  | 0           | 2 | 0 |   |
| 1 | 12.82 | 0 | 58 buccal muco   | 1 | 1 | 1  | 4 | 4   | 2 | 1 | 0000/00/00  | 0           | 2 | 1 |   |
| 1 | 67.11 | 1 | 50 buccal muco   | 1 | 0 | 0  | 4 | 3   | 2 | 1 | 0           | 2014/6/5    | 1 | 2 | 1 |
| 1 | 67.08 | 1 | 62 buccal muco   | 1 | 1 | 0  | 1 | 1   | 0 | 0 | 0000/00/00  | 0           | 1 | 0 |   |
| 1 | 33.41 | 0 | 64 buccal muco   | 1 | 0 | 0  | 1 | 1 x | x | 0 | 0000/00/00  | 0           | 1 |   |   |
| 1 | 3.90  | 0 | 52 mouth floor   | 1 | 0 | 1  | 1 | 1   | 0 | 0 | 0           | 2014/8/1    | 1 | 2 | 0 |
| 1 | 41.51 | 0 | 76 alveolar ridg | 0 | 0 | 0  | 4 | 4   | 0 | 0 | 0           | 2013/1/1/26 | 1 | 2 | 0 |
| 1 | 19.44 | 0 | 80 hard palate   | 0 | 0 | 0  | 2 | 2 x | x | 0 | 0           | 2015/1/1/6  | 1 | 2 |   |
| 1 | 51.15 | 0 | 54 buccal muco   | 0 | 0 | 1  | 1 | 1   | 0 | 0 | 0           | 2014/4/4    | 1 | 2 | 0 |
| 1 | 66.85 | 1 | 80 alveolar ridg | 0 | 0 | 0  | 4 | 4   | 0 | 0 | 0           | 2017/10/24  | 1 | 2 | 0 |
| 1 | 66.85 | 1 | 83 buccal muco   | 0 | 0 | 0  | 3 | 3   | 0 | 0 | 0000/00/00  | 0           | 2 | 0 |   |
| 1 | 66.82 | 1 | 59 buccal muco   | 0 | 1 | 1  | 1 | 1   | 0 | 0 | 0000/00/00  | 0           | 1 | 0 |   |
| 1 | 66.85 | 1 | 48 buccal muco   | 0 | 0 | 1  | 2 | 2   | 0 | 0 | 0           | 2016/9/26   | 1 | 2 | 0 |
| 1 | 66.72 | 1 | 66 rmt           | 1 | 0 | 1  | 4 | 4   | 0 | 0 | 0000/00/00  | 0           | 2 | 0 |   |
| 1 | 27.25 | 0 | 68 ant tongue    | 1 | 1 | 1  | 1 | 1   | 0 | 0 | 0000/00/00  | 0           | 2 | 0 |   |

|   |       |   |    |                |   |   |   |    |   |   |   |            |            |   |   |   |
|---|-------|---|----|----------------|---|---|---|----|---|---|---|------------|------------|---|---|---|
| 1 | 3.90  | 0 | 72 | alveolar ridge | 1 | 1 | 4 | 4  | 0 | 0 | 0 | 0000/00/00 | 0          | 1 | 0 |   |
| 1 | 18.82 | 0 | 56 | ant tongue     | 0 | 0 | 0 | 1  | x | x | 0 | 0000/00/00 | 0          | 2 |   |   |
| 1 | 20.49 | 0 | 72 | buccal muco    | 0 | 0 | 0 | 2  | x | x | 0 | 2014/2/14  | 1          | 2 |   |   |
| 1 | 11.67 | 0 | 56 | lip            | 0 | 0 | 0 | 4  | 1 | 1 | 0 | 2014/9/22  | 1          | 2 | 1 |   |
| 1 | 14.16 | 0 | 45 | ant tongue     | 1 | 0 | 1 | 4  | 4 | 0 | 0 | 2014/7/23  | 1          | 2 | 0 |   |
| 1 | 66.43 | 1 | 53 | buccal muco    | 1 | 1 | 0 | 1  | 1 | x | x | 0          | 0000/00/00 | 0 | 2 |   |
| 1 | 14.62 | 0 | 62 | buccal muco    | 0 | 0 | 0 | 2  | 2 | 0 | 0 | 2014/3/11  | 1          | 2 | 0 |   |
| 1 | 66.26 | 1 | 54 | lip            | 1 | 1 | 1 | 2  | 2 | 0 | 0 | 0000/00/00 | 0          | 1 | 0 |   |
| 1 | 66.23 | 1 | 44 | mouth floor    | 1 | 1 | 1 | 1  | 1 | 0 | 0 | 0000/00/00 | 0          | 2 | 0 |   |
| 1 | 65.21 | 0 | 56 | buccal muco    | 1 | 1 | 0 | 4  | 4 | 0 | 0 | 0000/00/00 | 0          | 2 | 0 |   |
| 1 | 45.02 | 0 | 65 | lip            | 1 | 1 | 1 | 4  | 4 | 0 | 0 | 0000/00/00 | 0          | 2 | 0 |   |
| 1 | 66.03 | 1 | 53 | buccal muco    | 1 | 0 | 1 | 1  | 1 | 0 | 0 | 0000/00/00 | 0          | 2 | 0 |   |
| 1 | 65.97 | 1 | 77 | ant tongue     | 0 | 0 | 1 | 1  | 1 | 0 | 0 | 2016/3/22  | 1          | 2 | 0 |   |
| 1 | 66.66 | 1 | 45 | buccal muco    | 1 | 0 | 0 | 3  | 1 | 1 | 0 | 0000/00/00 | 0          | 2 | 1 |   |
| 1 | 66.43 | 1 | 39 | buccal muco    | 1 | 1 | 1 | 4  | 4 | 0 | 0 | 0000/00/00 | 0          | 2 | 0 |   |
| 1 | 65.97 | 1 | 59 | ant tongue     | 1 | 1 | 1 | 2  | 2 | 0 | 0 | 0000/00/00 | 0          | 2 | 0 |   |
| 1 | 67.08 | 1 | 70 | buccal muco    | 1 | 1 | 0 | 1  | 1 | x | x | 0          | 2014/12/19 | 1 | 2 |   |
| 1 | 10.20 | 0 | 57 | hard palate    | 1 | 1 | 0 | 4  | 2 | 2 | 1 | 0000/00/00 | 0          | 2 | 1 |   |
| 1 | 78.66 | 1 | 62 | ant tongue     | 1 | 0 | 0 | 1  | 1 | 0 | 0 | 2014/2/24  | 1          | 1 | 0 |   |
| 1 | 25.18 | 0 | 45 | buccal muco    | 1 | 0 | 1 | 4  | 4 | 2 | 1 | 2014/12/26 | 1          | 2 | 1 |   |
| 1 | 14.26 | 0 | 56 | buccal muco    | 1 | 0 | 0 | 2  | 2 | 0 | 0 | 2014/9/25  | 1          | 2 | 0 |   |
| 1 | 65.93 | 1 | 70 | buccal muco    | 0 | 0 | 1 | 1  | 1 | x | x | 0          | 2013/12/13 | 1 | 1 |   |
| 1 | 7.28  | 0 | 69 | rmt            | 1 | 0 | 1 | 4  | 4 | 2 | 1 | 0          | 2014/5/8   | 1 | 2 | 1 |
| 1 | 65.54 | 1 | 45 | lip            | 1 | 1 | 0 | 2  | 2 | 0 | 0 | 0000/00/00 | 0          | 2 | 0 |   |
| 1 | 65.54 | 1 | 58 | buccal muco    | 0 | 1 | 0 | 1  | 1 | x | x | 0000/00/00 | 0          | 2 |   |   |
| 1 | 65.51 | 1 | 59 | ant tongue     | 0 | 0 | 0 | 1  | 1 | 0 | 0 | 0000/00/00 | 0          | 1 | 0 |   |
| 1 | 66.00 | 1 | 41 | ant tongue     | 1 | 0 | 1 | 1  | 1 | 0 | 0 | 2016/11/4  | 1          | 1 | 0 |   |
| 1 | 51.67 | 0 | 63 | lip            | 0 | 0 | 0 | 1  | 1 | x | x | 0          | 2014/5/10  | 1 | 2 |   |
| 1 | 67.77 | 1 | 55 | rmt            | 1 | 0 | 0 | 4  | 4 | 1 | 0 | 0000/00/00 | 0          | 2 | 1 |   |
| 1 | 65.41 | 1 | 63 | buccal muco    | 1 | 0 | 1 | 無法 | 1 | x | x | 0          | 2018/3/23  | 1 | 2 |   |
| 1 | 65.28 | 1 | 63 | alveolar ridge | 1 | 1 | 0 | 4  | 4 | 0 | 0 | 0000/00/00 | 0          | 2 | 0 |   |
| 1 | 65.77 | 1 | 64 | buccal muco    | 0 | 0 | 0 | 1  | 1 | x | x | 0000/00/00 | 0          | 2 |   |   |
| 1 | 9.38  | 0 | 44 | buccal muco    | 0 | 1 | 0 | 3  | 3 | 0 | 0 | 2014/6/24  | 1          | 2 | 0 |   |
| 1 | 65.05 | 1 | 58 | rmt            | 0 | 0 | 0 | 4  | 4 | 0 | 0 | 0000/00/00 | 0          | 1 | 0 |   |
| 1 | 66.39 | 1 | 52 | buccal muco    | 1 | 0 | 1 | 3  | 2 | 1 | 1 | 0000/00/00 | 0          | 2 | 1 |   |
| 1 | 64.98 | 1 | 43 | buccal muco    | 1 | 1 | 0 | 2  | 2 | 0 | 0 | 2016/6/17  | 1          | 2 | 0 |   |
| 1 | 33.64 | 0 | 51 | buccal muco    | 1 | 0 | 0 | 2  | 2 | 0 | 0 | 0000/00/00 | 0          | 1 | 0 |   |
| 1 | 65.38 | 1 | 37 | ant tongue     | 1 | 1 | 0 | 1  | 1 | 0 | 0 | 0          | 2016/1/6   | 1 | 2 | 0 |
| 1 | 8.95  | 0 | 58 | mouth floor    | 0 | 0 | 0 | 1  | 1 | 0 | 0 | 0000/00/00 | 0          | 2 | 0 |   |
| 1 | 64.89 | 1 | 63 | buccal muco    | 1 | 0 | 0 | 1  | 1 | 0 | 0 | 0000/00/00 | 0          | 2 | 0 |   |
| 1 | 5.51  | 0 | 47 | alveolar ridge | 1 | 1 | 1 | 4  | 4 | 2 | 1 | 0          | 2014/4/18  | 1 | 2 | 1 |
| 1 | 9.15  | 0 | 39 | buccal muco    | 1 | 1 | 1 | 4  | 3 | 2 | 0 | 0          | 2014/9/17  | 1 | 2 | 1 |
| 1 | 65.08 | 1 | 49 | lip            | 0 | 0 | 0 | 1  | 1 | x | x | 0          | 0000/00/00 | 0 | 1 |   |
| 1 | 65.18 | 1 | 50 | mouth floor    | 1 | 1 | 0 | 4  | 1 | 2 | 0 | 0000/00/00 | 0          | 2 | 1 |   |
| 1 | 9.80  | 0 | 50 | ant tongue     | 1 | 0 | 0 | 4  | 2 | 2 | 1 | 0000/00/00 | 0          | 2 | 1 |   |
| 1 | 56.26 | 0 | 64 | alveolar ridge | 0 | 0 | 0 | 1  | 1 | x | x | 0000/00/00 | 0          | 2 |   |   |
| 1 | 64.52 | 1 | 63 | alveolar ridge | 0 | 0 | 0 | 4  | 4 | 0 | 0 | 0000/00/00 | 0          | 2 | 0 |   |
| 1 | 64.39 | 1 | 68 | buccal muco    | 0 | 0 | 0 | 2  | 2 | 0 | 0 | 0000/00/00 | 0          | 2 | 0 |   |
| 1 | 64.49 | 1 | 69 | buccal muco    | 1 | 0 | 0 | 2  | 2 | x | x | 0000/00/00 | 0          | 1 |   |   |
| 1 | 65.11 | 1 | 48 | ant tongue     | 0 | 0 | 1 | 1  | 1 | x | x | 0000/00/00 | 0          | 1 |   |   |
| 1 | 64.79 | 1 | 48 | buccal muco    | 1 | 1 | 1 | 4  | 4 | 0 | 0 | 0000/00/00 | 0          | 2 | 0 |   |
| 1 | 24.33 | 0 | 58 | ant tongue     | 1 | 1 | 1 | 1  | 1 | 0 | 0 | 0000/00/00 | 0          | 2 | 0 |   |
| 1 | 64.98 | 1 | 58 | buccal muco    | 0 | 0 | 0 | 1  | 1 | 0 | 0 | 0000/00/00 | 0          | 1 | 0 |   |
| 1 | 26.43 | 0 | 60 | ant tongue     | 1 | 0 | 1 | 2  | 2 | x | x | 0000/00/00 | 0          | 2 |   |   |
| 1 | 17.31 | 0 | 51 | lip            | 0 | 0 | 0 | 4  | 4 | 0 | 0 | 2014/5/29  | 1          | 3 | 0 |   |
| 1 | 64.36 | 1 | 54 | buccal muco    | 1 | 1 | 0 | 1  | 1 | 0 | 0 | 0000/00/00 | 0          | 1 | 0 |   |
| 1 | 64.10 | 1 | 54 | buccal muco    | 1 | 0 | 0 | 2  | 2 | 0 | 0 | 0000/00/00 | 0          | 3 | 0 |   |
| 1 | 22.85 | 0 | 55 | lip            | 0 | 0 | 0 | 1  | 1 | x | x | 0          | 2015/8/30  | 1 | 2 |   |
| 1 | 64.07 | 1 | 47 | ant tongue     | 0 | 0 | 0 | 1  | 1 | x | x | 0000/00/00 | 0          | 2 |   |   |
| 1 | 64.20 | 1 | 50 | alveolar ridge | 1 | 0 | 0 | 4  | 4 | 0 | 0 | 0000/00/00 | 0          | 2 | 0 |   |
| 1 | 63.70 | 1 | 57 | lip            | 0 | 1 | 0 | 1  | 1 | 0 | 0 | 0000/00/00 | 0          | 2 | 0 |   |
| 1 | 64.39 | 1 | 54 | hard palate    | 1 | 0 | 1 | 1  | 1 | x | x | 0000/00/00 | 0          | 1 |   |   |
| 1 | 63.64 | 1 | 46 | buccal muco    | 1 | 1 | 1 | 3  | 3 | 0 | 0 | 0000/00/00 | 0          | 2 | 0 |   |
| 1 | 63.44 | 1 | 61 | lip            | 0 | 0 | 0 | 4  | 4 | 0 | 0 | 0000/00/00 | 0          | 3 | 0 |   |
| 1 | 25.31 | 0 | 57 | ant tongue     | 1 | 0 | 1 | 4  | 4 | 2 | 1 | 0          | 2014/10/31 | 1 | 2 | 1 |
| 1 | 10.92 | 0 | 58 | buccal muco    | 1 | 1 | 0 | 4  | 2 | 2 | 0 | 0000/00/00 | 0          | 2 | 1 |   |
| 1 | 63.21 | 1 | 56 | lip            | 0 | 0 | 0 | 1  | 1 | x | x | 0000/00/00 | 0          | 2 |   |   |
| 1 | 63.18 | 1 | 45 | buccal muco    | 0 | 1 | 0 | 1  | 1 | 0 | 0 | 0000/00/00 | 0          | 2 | 0 |   |
| 1 | 63.05 | 1 | 46 | lip            | 1 | 0 | 0 | 3  | 1 | 1 | 0 | 0000/00/00 | 0          | 2 | 1 |   |
| 1 | 64.75 | 1 | 47 | buccal muco    | 1 | 1 | 1 | 1  | 1 | x | x | 0000/00/00 | 0          | 1 |   |   |
| 1 | 63.05 | 1 | 54 | alveolar ridge | 1 | 1 | 1 | 4  | 4 | 0 | 0 | 0000/00/00 | 0          | 1 | 0 |   |
| 1 | 37.54 | 0 | 66 | buccal muco    | 1 | 0 | 1 | 3  | 3 | 0 | 0 | 0000/00/00 | 0          | 1 | 0 |   |



|   |       |   |                   |   |   |      |   |     |   |   |              |   |   |   |
|---|-------|---|-------------------|---|---|------|---|-----|---|---|--------------|---|---|---|
| 1 | 63.02 | 1 | 38 lip            | 1 | 1 | 0    | 2 | 2   | 0 | 0 | 0 0000/00/00 | 0 | 2 | 0 |
| 1 | 62.98 | 1 | 56 buccal muco    | 1 | 1 | 0    | 4 | 4   | 0 | 0 | 0 0000/00/00 | 0 | 2 | 0 |
| 1 | 62.98 | 1 | 51 buccal muco    | 0 | 0 | 0    | 4 | 2   | 2 | 1 | 0 0000/00/00 | 0 | 2 | 1 |
| 1 | 54.52 | 0 | 56 lip            | 0 | 0 | 0    | 1 | 1 x | x |   | 0 0000/00/00 | 0 | 2 |   |
| 1 | 64.43 | 1 | 71 buccal muco    | 0 | 0 | 0    | 1 | 1 x | x |   | 0 0000/00/00 | 0 | 2 |   |
| 1 | 26.30 | 0 | 58 alveolar ridge | 1 | 1 | 1    | 4 | 4   | 0 | 0 | 0 2015/5/6   | 1 | 2 | 0 |
| 1 | 62.69 | 1 | 57 buccal muco    | 1 | 1 | 1    | 4 | 4   | 1 | 0 | 0 0000/00/00 | 0 | 2 | 1 |
| 1 | 62.59 | 1 | 67 buccal muco    | 1 | 1 | 1    | 3 | 1   | 1 | 0 | 0 0000/00/00 | 0 | 2 | 1 |
| 1 | 62.69 | 1 | 75 buccal muco    | 0 | 0 | 0    | 1 | 1   | 0 | 0 | 0 0000/00/00 | 0 | 2 | 0 |
| 1 | 11.84 | 0 | 70 buccal muco    | 0 | 0 | 0    | 4 | 1   | 0 | 0 | 0 0000/00/00 | 0 | 2 | 0 |
| 1 | 62.75 | 1 | 38 ant tongue     | 1 | 1 | 0    | 4 | 4   | 2 | 1 | 0 0000/00/00 | 0 | 2 | 1 |
| 1 | 64.98 | 1 | 45 buccal muco    | 1 | 1 | 0    | 1 | 1   | 0 | 0 | 0 0000/00/00 | 0 | 2 | 0 |
| 1 | 46.46 | 0 | 71 buccal muco    | 0 | 0 | 0    | 1 | 1 x | x |   | 0 0000/00/00 | 0 | 2 |   |
| 1 | 10.20 | 0 | 74 alveolar ridge | 1 | 1 | 0    | 1 | 1   | 0 | 0 | 0 0000/00/00 | 0 | 2 | 0 |
| 1 | 8.10  | 0 | 48 buccal muco    | 0 | 0 | 0    | 4 | 4   | 0 | 0 | 0 2014/9/24  | 1 | 2 | 0 |
| 1 | 0.82  | 0 | 55 buccal muco    | 1 | 0 | 0    | 1 | 1   | 0 | 0 | 0 0000/00/00 | 0 | 1 | 0 |
| 1 | 4.16  | 0 | 70 buccal muco    | 0 | 0 | 0    | 4 | 3   | 2 | 1 | 0 2014/5/14  | 1 | 2 | 1 |
| 1 | 62.13 | 1 | 44 ant tongue     | 1 | 0 | 0    | 1 | 1   | 0 | 0 | 0 0000/00/00 | 0 | 1 | 0 |
| 1 | 62.13 | 1 | 48 ant tongue     | 1 | 0 | 0    | 1 | 1   | 0 | 0 | 0 0000/00/00 | 0 | 2 | 0 |
| 1 | 62.13 | 1 | 64 lip            | 1 | 1 | 0    | 3 | 3   | 0 | 0 | 0 0000/00/00 | 0 | 2 | 0 |
| 1 | 25.41 | 0 | 48 rmt            | 0 | 0 | 0    | 1 | 1   | 0 | 0 | 0 0000/00/00 | 0 | 1 | 0 |
| 1 | 15.51 | 0 | 54 buccal muco    | 1 | 1 | 0    | 4 | 4   | 2 | 1 | 0 0000/00/00 | 0 | 2 | 1 |
| 1 | 10.46 | 0 | 53 hard palate    | 1 | 1 |      | 4 | 4   | 2 | 1 | 0 0000/00/00 | 0 | 2 | 1 |
| 1 | 61.77 | 1 | 57 alveolar ridge | 0 | 0 | 0    | 1 | 1 x | x |   | 0 0000/00/00 | 0 | 2 |   |
| 1 | 61.77 | 1 | 60 ant tongue     | 0 | 0 | 0    | 1 | 1   | 0 | 0 | 0 0000/00/00 | 0 | 2 | 0 |
| 1 | 61.67 | 1 | 50 alveolar ridge | 0 | 0 | 0    | 4 | 4   | 0 | 0 | 0 2018/5/14  | 1 | 1 | 0 |
| 1 | 62.36 | 1 | 36 rmt            | 1 | 1 | 1    | 2 | 2   | 0 | 0 | 0 0000/00/00 | 0 | 2 | 0 |
| 1 | 10.13 | 0 | 51 buccal muco    | 0 | 0 | 0    | 4 | 4   | 2 | 1 | 0 0000/00/00 | 0 | 1 | 1 |
| 1 | 61.84 | 1 | 42 buccal muco    | 0 | 0 | 0    | 1 | 1   | 0 | 0 | 0 0000/00/00 | 0 | 1 | 0 |
| 1 | 52.46 | 0 | 56 buccal muco    | 1 | 0 | 0    | 1 | 1   | 0 | 0 | 0 2017/2/27  | 1 | 2 | 0 |
| 1 | 15.70 | 0 | 70 alveolar ridge | 0 | 0 | 0    | 1 | 1 x | x |   | 0 0000/00/00 | 0 | 2 |   |
| 1 | 61.41 | 1 | 57 buccal muco    | 0 | 0 | 0    | 1 | 1   | 0 | 0 | 0 0000/00/00 | 0 | 2 | 0 |
| 1 | 61.80 | 1 | 46 buccal muco    | 1 | 0 | 1    | 3 | 3   | 0 | 0 | 0 0000/00/00 | 0 | 1 | 0 |
| 1 | 3.97  | 0 | 46 lip            | 1 | 0 | 0    | 2 | 2 x | x |   | 1 0000/00/00 | 0 | 2 |   |
| 1 | 61.31 | 1 | 43 buccal muco    | 1 | 1 | 0    | 2 | 2   | 0 | 0 | 0 0000/00/00 | 0 | 2 | 0 |
| 1 | 25.41 | 0 | 48 hard palate    | 0 | 0 | 0    | 2 | 2   | 0 | 0 | 1 0000/00/00 | 0 | 2 | 0 |
| 1 | 6.89  | 0 | 53 buccal muco    | 1 | 0 | 0    | 3 | 2   | 1 | 0 | 0 2014/9/10  | 1 | 2 | 1 |
| 1 | 61.44 | 1 | 61 alveolar ridge | 1 | 0 | 0    | 4 | 4   | 2 | 1 | 0 0000/00/00 | 0 | 2 | 1 |
| 1 | 61.67 | 1 | 43 mouth floor    | 1 | 0 | 0    | 1 | 1   | 0 | 0 | 0 0000/00/00 | 0 | 2 | 0 |
| 1 | 0.59  | 0 | 58 buccal muco    | 1 | 0 |      | 3 | 3   | 0 | 0 | 0 0000/00/00 | 0 | 2 | 0 |
| 1 | 61.21 | 1 | 56 alveolar ridge | 1 | 0 | 0    | 4 | 4   | 0 | 0 | 0 0000/00/00 | 0 | 2 | 0 |
| 1 | 7.08  | 0 | 76 buccal muco    | 1 | 1 | 0    | 4 | 4   | 0 | 0 | 0 0000/00/00 | 0 | 2 | 0 |
| 1 | 61.57 | 1 | 45 ant tongue     | 1 | 0 |      | 4 | 4   | 0 | 0 | 0 0000/00/00 | 0 | 2 | 0 |
| 1 | 4.23  | 0 | 39 ant tongue     | 1 | 1 |      | 4 | 4   | 3 | 1 | 0 0000/00/00 | 0 | 3 | 1 |
| 1 | 61.41 | 1 | 34 buccal muco    | 1 | 1 |      | 2 | 2   | 0 | 0 | 0 0000/00/00 | 0 | 1 | 0 |
| 1 | 60.85 | 1 | 54 hard palate    | 1 | 0 | 0    | 1 | 1 x | x |   | 0 0000/00/00 | 0 | 2 |   |
| 1 | 60.62 | 1 | 58 alveolar ridge | 1 | 0 | 0    | 1 | 1   | 0 | 0 | 0 0000/00/00 | 0 | 2 | 0 |
| 1 | 8.82  | 0 | 49 ant tongue     | 1 | 0 | 0    | 1 | 1   | 0 | 0 | 0 2014/6/19  | 1 | 2 | 0 |
| 1 | 60.69 | 1 | 57 alveolar ridge | 1 | 0 | 0    | 4 | 4   | 0 | 0 | 0 0000/00/00 | 0 | 2 | 0 |
| 1 | 39.90 | 0 | 62 hard palate    | 0 | 0 | 0    | 1 | 1   | 0 | 0 | 0 0000/00/00 | 0 | 2 | 0 |
| 1 | 60.89 | 1 | 48 ant tongue     | 1 | 1 | 1    | 1 | 1   | 0 | 0 | 0 0000/00/00 | 0 | 1 | 0 |
| 1 | 16.56 | 0 | 44 alveolar ridge | 1 | 1 |      | 4 | 4   | 0 | 0 | 0 2015/5/21  | 1 | 2 | 0 |
| 1 | 60.46 | 1 | 53 ant tongue     | 1 | 0 |      | 2 | 2   | 0 | 0 | 0 0000/00/00 | 0 | 2 | 0 |
| 1 | 60.30 | 1 | 66 buccal muco    | 0 | 0 |      | 1 | 1   | 0 | 0 | 0 0000/00/00 | 0 | 2 | 0 |
| 1 | 60.39 | 1 | 57 ant tongue     | 0 | 0 | 0    | 4 | 4   | 0 | 0 | 1 0000/00/00 | 0 | 2 | 0 |
| 1 | 10.20 | 0 | 61 buccal muco    | 0 | 0 | 0    | 2 | 2   | 0 | 0 | 0 0000/00/00 | 0 | 2 | 0 |
| 1 | 60.66 | 1 | 50 ant tongue     | 1 | 0 | 1    | 1 | 1 x | x |   | 0 0000/00/00 | 0 | 2 |   |
| 1 | 6.75  | 0 | 51 hard palate    | 0 | 0 | 0    | 3 | 3   | 1 | 0 | 1 0000/00/00 | 0 | 3 | 1 |
| 1 | 54.98 | 0 | 58 buccal muco    | 0 | 1 |      | 4 | 4   | 2 | 1 | 1 0000/00/00 | 0 | 2 | 1 |
| 1 | 60.23 | 1 | 60 alveolar ridge | 1 | 1 |      | 4 | 4   | 0 | 0 | 0 2017/1/14  | 1 | 2 | 0 |
| 1 | 60.03 | 1 | 57 alveolar ridge | 1 | 0 | 0    | 2 | 2   | 0 | 0 | 0 0000/00/00 | 0 | 2 | 0 |
| 1 | 19.74 | 0 | 60 rmt            | 1 | 1 | 0    | 4 | 4   | 0 | 0 | 0 2015/5/27  | 1 | 2 | 0 |
| 1 | 60.39 | 1 | 40 buccal muco    | 1 | 0 | 0    | 1 | 1 x | x |   | 0 0000/00/00 | 0 | 1 |   |
| 1 | 19.05 | 0 | 53 alveolar ridge | 0 | 0 | 0    | 1 | 1   | 0 | 0 | 0 0000/00/00 | 0 | 1 | 0 |
| 1 | 3.84  | 0 | 64 alveolar ridge | 0 | 0 | 0 無法 |   | 4 x | x |   | 0 0000/00/00 | 0 | 2 |   |
| 1 | 59.93 | 1 | 43 lip            | 1 | 1 | 1    | 1 | 1   | 0 | 0 | 0 0000/00/00 | 0 | 2 | 0 |
| 1 | 59.93 | 1 | 66 alveolar ridge | 0 | 0 | 0    | 1 | 1   | 0 | 0 | 0 0000/00/00 | 0 | 1 | 0 |
| 1 | 12.79 | 0 | 61 buccal muco    | 0 | 0 | 0    | 2 | 2   | 0 | 0 | 0 0000/00/00 | 0 | 1 | 0 |
| 1 | 60.39 | 1 | 55 rmt            | 0 | 0 | 0    | 2 | 2   | 0 | 0 | 0 0000/00/00 | 0 | 2 | 0 |
| 1 | 59.80 | 1 | 44 buccal muco    | 0 | 0 | 0    | 1 | 1   | 0 | 0 | 0 0000/00/00 | 0 | 2 | 0 |
| 1 | 59.70 | 1 | 69 alveolar ridge | 0 | 0 | 0    | 1 | 1 x | x |   | 0 0000/00/00 | 0 | 2 |   |
| 1 | 44.39 | 0 | 55 lip            | 1 | 1 | 0    | 1 | 1   | 0 | 0 | 0 0000/00/00 | 0 | 2 | 0 |

|   |       |   |    |                |   |   |      |   |     |     |   |   |            |   |   |   |
|---|-------|---|----|----------------|---|---|------|---|-----|-----|---|---|------------|---|---|---|
| 1 | 9.25  | 0 | 55 | alveolar ridge | 1 | 0 | 0    | 4 | 4   | 0   | 0 | 0 | 0000/00/00 | 0 | 2 | 0 |
| 1 | 4.66  | 0 | 46 | lip            | 1 | 0 | 1    | 4 | 4   | 2   | 1 | 0 | 2014/10/6  | 1 | 2 | 1 |
| 1 | 59.51 | 1 | 41 | buccal muco    | 1 | 1 | 0    | 1 | 1 x | x   |   | 0 | 0000/00/00 | 0 | 1 | 1 |
| 1 | 59.28 | 1 | 79 | ant tongue     | 0 | 0 | 0    | 2 | 2   | 0   | 0 | 0 | 0000/00/00 | 0 | 2 | 0 |
| 1 | 59.38 | 1 | 50 | ant tongue     | 1 | 1 | 0    | 1 | 1 x | x   |   | 0 | 0000/00/00 | 0 | 1 | 1 |
| 1 | 22.49 | 0 | 56 | buccal muco    | 1 | 1 | 1    | 2 | 2   | 0   | 0 | 0 | 2015/5/21  | 1 | 2 | 0 |
| 1 | 59.48 | 1 | 47 | lip            | 0 | 0 | 0    | 1 | 1 x | x   |   | 0 | 2016/6/27  | 1 | 2 | 1 |
| 1 | 59.31 | 1 | 66 | ant tongue     | 0 | 0 | 0    | 1 | 1 x | x   |   | 0 | 0000/00/00 | 0 | 2 | 0 |
| 1 | 59.54 | 1 | 70 | ant tongue     | 0 | 0 | 0    | 2 | 2   | 0   | 0 | 0 | 0000/00/00 | 0 | 2 | 0 |
| 1 | 59.21 | 1 | 56 | buccal muco    | 0 | 0 | 1    | 2 | 2   | 0   | 0 | 0 | 0000/00/00 | 0 | 1 | 0 |
| 1 | 16.39 | 0 | 55 | ant tongue     | 1 | 0 | 0    | 3 | 1   | 1   | 0 | 0 | 2014/11/18 | 1 | 2 | 1 |
| 1 | 31.18 | 0 | 68 | alveolar ridge | 1 | 0 | 0    | 4 | 4   | 0   | 0 | 0 | 0000/00/00 | 0 | 1 | 0 |
| 1 | 59.11 | 1 | 61 | alveolar ridge | 0 | 0 | 1    | 3 | 3   | 0   | 0 | 0 | 0000/00/00 | 0 | 2 | 0 |
| 1 | 59.11 | 1 | 67 | ant tongue     | 1 | 0 | 1    | 2 | 2   | 0   | 0 | 0 | 0000/00/00 | 0 | 1 | 0 |
| 1 | 59.77 | 1 | 41 | buccal muco    | 0 | 0 | 0    | 2 | 2   | 0   | 0 | 0 | 0000/00/00 | 0 | 2 | 0 |
| 1 | 59.44 | 1 | 54 | buccal muco    | 0 | 0 | 0    | 4 | 4   | 0   | 0 | 0 | 0000/00/00 | 0 | 2 | 0 |
| 1 | 40.10 | 0 | 53 | buccal muco    | 1 | 0 | 1    | 2 | 2   | 0   | 0 | 0 | 0000/00/00 | 0 | 2 | 0 |
| 1 | 59.08 | 1 | 78 | lip            | 0 | 0 | 0    | 1 | 1 x | x   |   | 0 | 0000/00/00 | 0 | 2 | 0 |
| 1 | 6.07  | 1 | 46 | rmt            | 1 | 0 | 0    | 4 | 4   | 2   | 1 | 0 | 2014/12/24 | 1 | 2 | 1 |
| 1 | 32.49 | 0 | 45 | ant tongue     | 1 | 1 | 1    | 4 | 1   | 2   | 1 | 0 | 2015/8/27  | 1 | 2 | 1 |
| 1 | 58.85 | 1 | 61 | rmt            | 1 | 0 | 1    | 1 | 1   | 0   | 0 | 0 | 0000/00/00 | 0 | 2 | 0 |
| 1 | 36.13 | 0 | 56 | ant tongue     | 1 | 1 | 1    | 4 | 4   | 1   | 1 | 0 | 2016/8/9   | 1 | 2 | 1 |
| 1 | 60.00 | 1 | 52 | buccal muco    | 0 | 0 | 0    | 1 | 1   | 0   | 0 | 0 | 0000/00/00 | 0 | 1 | 0 |
| 1 | 58.79 | 1 | 67 | ant tongue     | 1 | 1 | 1    | 1 | 1   | 0   | 0 | 0 | 0000/00/00 | 0 | 2 | 0 |
| 1 | 58.79 | 1 | 55 | ant tongue     | 1 | 1 | 1    | 2 | 2   | 0   | 0 | 0 | 0000/00/00 | 0 | 3 | 0 |
| 1 | 58.66 | 1 | 70 | buccal muco    | 0 | 0 | 0    | 1 | 1   | 0   | 0 | 0 | 0000/00/00 | 0 | 2 | 0 |
| 1 | 58.56 | 1 | 54 | buccal muco    | 1 | 0 | 1    | 1 | 1   | 0   | 0 | 0 | 0000/00/00 | 0 | 2 | 0 |
| 1 | 58.82 | 1 | 58 | buccal muco    | 1 | 1 | 1    | 1 | 1   | 0   | 0 | 0 | 0000/00/00 | 0 | 1 | 0 |
| 1 | 19.31 | 0 | 90 | buccal muco    | 1 | 0 | 0    | 2 | 2   | 0   | 0 | 0 | 0000/00/00 | 0 | 1 | 0 |
| 1 | 6.03  | 0 | 58 | lip            | 1 | 1 | 1    | 1 | 1 x | x   |   | 0 | 0000/00/00 | 0 | 1 | 0 |
| 1 | 58.56 | 1 | 62 | buccal muco    | 0 | 0 | 0    | 3 | 3   | 0   | 0 | 0 | 0000/00/00 | 0 | 2 | 0 |
| 1 | 58.23 | 1 | 77 | buccal muco    | 0 | 0 | 0    | 1 | 1 x | x   |   | 0 | 0000/00/00 | 0 | 2 | 0 |
| 1 | 12.85 | 0 | 59 | ant tongue     | 0 | 0 | 0    | 1 | 1 x | x   |   | 0 | 2014/9/15  | 1 | 3 | 0 |
| 1 | 9.38  | 0 | 63 | ant tongue     | 1 | 0 | 1    | 4 | 4   | 2   | 1 | 0 | 2015/2/10  | 1 | 2 | 1 |
| 1 | 20.39 | 0 | 62 | ant tongue     | 1 | 1 | 1    | 4 | 2   | 2   | 0 | 0 | 2015/8/17  | 1 | 2 | 1 |
| 1 | 58.20 | 1 | 59 | buccal muco    | 1 | 0 | 1    | 3 | 2   | 1   | 0 | 0 | 0000/00/00 | 0 | 2 | 1 |
| 1 | 46.75 | 0 | 53 | buccal muco    | 0 | 0 | 0    | 1 | 1 x | x   |   | 0 | 0000/00/00 | 0 | 2 | 0 |
| 1 | 5.05  | 0 | 57 | hard palate    | 1 | 0 | 1    | 4 | 4   | 0   | 0 | 1 | 0000/00/00 | 0 | 2 | 0 |
| 1 | 58.16 | 1 | 58 | ant tongue     | 1 | 0 | 1    | 1 | 1 x | x   |   | 0 | 0000/00/00 | 0 | 2 | 0 |
| 1 | 5.38  | 0 | 52 | buccal muco    | 0 | 0 | 0    | 4 | 4   | 2   | 1 | 0 | 0000/00/00 | 0 | 2 | 1 |
| 1 | 60.92 | 1 | 45 | ant tongue     | 1 | 1 | 1    | 2 | 2   | 0   | 0 | 0 | 0000/00/00 | 0 | 2 | 0 |
| 1 | 58.30 | 1 | 43 | ant tongue     | 1 | 0 | 1    | 1 | 1   | 0   | 0 | 0 | 0000/00/00 | 0 | 2 | 0 |
| 1 | 58.85 | 1 | 57 | buccal muco    | 1 | 0 | 1    | 3 | 3   | 0   | 0 | 0 | 0000/00/00 | 0 | 1 | 0 |
| 1 | 12.07 | 0 | 51 | alveolar ridge | 1 | 0 | 0    | 4 | 4   | 0   | 0 | 0 | 0000/00/00 | 0 | 2 | 0 |
| 1 | 6.46  | 0 | 56 | ant tongue     | 1 | 0 | 1    | 1 | 1   | 0   | 0 | 0 | 2014/11/26 | 1 | 2 | 0 |
| 1 | 57.84 | 1 | 43 | buccal muco    | 0 | 0 | 0    | 1 | 1 x | x   |   | 0 | 0000/00/00 | 0 | 2 | 0 |
| 1 | 24.85 | 0 | 44 | buccal muco    | 0 | 0 | 0    | 1 | 1 x | x   |   | 0 | 2014/11/14 | 1 | 1 | 0 |
| 1 | 58.62 | 1 | 57 | buccal muco    | 1 | 1 | 1    | 1 | 1   | 0   | 0 | 0 | 0000/00/00 | 0 | 2 | 0 |
| 1 | 66.66 | 1 | 62 | ant tongue     | 1 | 1 | 0    | 2 | 2   | 0   | 0 | 0 | 2014/8/11  | 1 | 1 | 0 |
| 1 | 57.64 | 1 | 59 | alveolar ridge | 1 | 1 | 1    | 4 | 4   | 0   | 0 | 0 | 0000/00/00 | 0 | 2 | 0 |
| 1 | 58.20 | 1 | 66 | buccal muco    | 0 | 0 | 0    | 2 | 2 x | x   |   | 1 | 2015/5/7   | 1 | 1 | 0 |
| 1 | 57.54 | 1 | 56 | alveolar ridge | 1 | 0 | 0    | 4 | 4   | 0   | 0 | 0 | 0000/00/00 | 0 | 2 | 0 |
| 1 | 57.54 | 1 | 57 | ant tongue     | 0 | 0 | 0    | 1 | 1   | 0   | 0 | 0 | 0000/00/00 | 0 | 2 | 0 |
| 1 | 57.41 | 1 | 46 | ant tongue     | 1 | 1 | 0    | 1 | 1 x | x   |   | 0 | 0000/00/00 | 0 | 2 | 0 |
| 1 | 57.31 | 1 | 64 | ant tongue     | 1 | 1 | 1    | 4 | 2   | 2   | 1 | 0 | 0000/00/00 | 0 | 2 | 1 |
| 1 | 57.93 | 1 | 69 | lip            | 1 | 0 | 0    | 1 | 1   | 0   | 0 | 0 | 0000/00/00 | 0 | 2 | 0 |
| 1 | 57.25 | 1 | 36 | ant tongue     | 1 | 1 | 1    | 1 | 1   | 0   | 0 | 0 | 0000/00/00 | 0 | 2 | 0 |
| 1 | 57.25 | 1 | 57 | alveolar ridge | 1 | 0 | 0    | 1 | 1 x | x   |   | 0 | 0000/00/00 | 0 | 2 | 0 |
| 1 | 57.25 | 1 | 44 | mouth floor    | 1 | 1 | 1    | 1 | 1 x | x   |   | 0 | 0000/00/00 | 0 | 2 | 0 |
| 1 | 59.57 | 1 | 45 | ant tongue     | 1 | 1 | 1    | 1 | 1 x | x   |   | 0 | 2017/7/8   | 1 | 2 | 0 |
| 1 | 3.54  | 0 | 50 | lip            | 1 | 0 | 0    | 4 | 3   | 2   | 1 | 0 | 2014/9/24  | 1 | 2 | 1 |
| 1 | 1.87  | 0 | 56 | ant tongue     | 1 | 1 | 0    | 4 | 4   | 2   | 1 | 0 | 2014/10/2  | 1 | 2 | 1 |
| 1 | 59.34 | 1 | 53 | alveolar ridge | 1 | 0 | 1    | 4 | 4   | 0   | 0 | 0 | 0000/00/00 | 0 | 1 | 0 |
| 1 | 57.48 | 1 | 78 | lip            | 0 | 0 | 0    | 1 | 1 x | x   |   | 0 | 0000/00/00 | 0 | 1 | 0 |
| 1 | 56.98 | 1 | 75 | buccal muco    | 1 | 0 | 0    | 1 | 1   | 0   | 0 | 0 | 0000/00/00 | 0 | 2 | 0 |
| 1 | 56.98 | 1 | 52 | ant tongue     | 1 | 1 | 0 無法 |   |     | 0 x |   | 0 | 0000/00/00 | 0 | 2 | 0 |
| 1 | 57.31 | 1 | 33 | rmt            | 1 | 0 | 0    | 1 | 1   | 0   | 0 | 0 | 0000/00/00 | 0 | 2 | 0 |
| 1 | 13.67 | 0 | 63 | ant tongue     | 1 | 1 | 0    | 2 | 2   | 0   | 0 | 0 | 2015/4/23  | 1 | 3 | 0 |
| 1 | 57.21 | 1 | 52 | buccal muco    | 0 | 0 | 0    | 1 | 1   | 0   | 0 | 0 | 0000/00/00 | 0 | 1 | 0 |
| 1 | 58.10 | 1 | 72 | buccal muco    | 1 | 1 | 0    | 1 | 1   | 0   | 0 | 0 | 0000/00/00 | 0 | 1 | 0 |
| 1 | 56.75 | 1 | 71 | ant tongue     | 1 | 1 | 0    | 1 | 1   | 0   | 0 | 0 | 0000/00/00 | 0 | 1 | 0 |
| 1 | 56.92 | 1 | 60 | ant tongue     | 1 | 1 | 1    | 2 | 2 x | x   |   | 0 | 2014/12/27 | 1 | 2 | 0 |

|   |       |   |                  |   |   |   |   |     |   |   |            |   |   |
|---|-------|---|------------------|---|---|---|---|-----|---|---|------------|---|---|
| 1 | 25.31 | 0 | 64 lip           | 1 | 1 | 0 | 1 | 1 x | x | 0 | 0000/00/00 | 0 | 1 |
| 1 | 63.11 | 1 | 59 ant tongue    | 1 | 1 |   | 1 | 1 x | x | 0 | 0000/00/00 | 0 | 2 |
| 1 | 56.79 | 1 | 56 buccal muco   | 1 | 1 |   | 2 | 2   | 0 | 0 | 0000/00/00 | 0 | 1 |
| 1 | 56.75 | 1 | 45 buccal muco   | 1 | 0 | 0 | 2 | 2   | 0 | 0 | 2014/12/26 | 1 | 2 |
| 1 | 56.72 | 1 | 55 buccal muco   | 0 | 0 | 0 | 1 | 1   | 0 | 0 | 0000/00/00 | 0 | 2 |
| 1 | 56.59 | 1 | 79 rmt           | 1 | 0 | 0 | 1 | 1 x | x | 0 | 0000/00/00 | 0 | 2 |
| 1 | 57.54 | 1 | 67 buccal muco   | 0 | 0 | 1 | 2 | 2   | 0 | 0 | 0000/00/00 | 0 | 2 |
| 1 | 15.34 | 0 | 47 rmt           | 1 | 0 | 0 | 4 | 4 x | x | 0 | 2015/1/20  | 1 | 2 |
| 1 | 56.56 | 1 | 64 buccal muco   | 1 | 1 | 0 | 3 | 3   | 0 | 0 | 0000/00/00 | 0 | 2 |
| 1 | 56.59 | 1 | 47 buccal muco   | 1 | 1 | 0 | 1 | 1   | 0 | 0 | 0000/00/00 | 0 | 1 |
| 1 | 56.82 | 1 | 41 buccal muco   | 1 | 1 | 1 | 3 | 3   | 1 | 0 | 0000/00/00 | 0 | 2 |
| 1 | 47.77 | 0 | 50 buccal muco   | 1 | 1 | 1 | 2 | 2   | 0 | 0 | 0000/00/00 | 0 | 2 |
| 1 | 56.52 | 1 | 62 hard palate   | 1 | 1 | 1 | 1 | 1 x | x | 0 | 0000/00/00 | 0 | 2 |
| 1 | 15.70 | 0 | 70 hard palate   | 1 | 1 | 1 | 4 | 4   | 0 | 0 | 2015/4/9   | 1 | 2 |
| 1 | 56.39 | 1 | 41 mouth floor   | 1 | 0 | 1 | 4 | 4   | 2 | 0 | 0000/00/00 | 0 | 2 |
| 1 | 56.52 | 1 | 69 buccal muco   | 0 | 0 | 0 | 3 | 3   | 0 | 0 | 0000/00/00 | 0 | 2 |
| 1 | 56.33 | 1 | 54 mouth floor   | 0 | 0 | 0 | 1 | 1   | 0 | 0 | 0000/00/00 | 0 | 1 |
| 1 | 56.33 | 1 | 75 buccal muco   | 0 | 0 | 0 | 1 | 1   | 0 | 0 | 0000/00/00 | 0 | 1 |
| 1 | 56.46 | 1 | 45 ant tongue    | 0 | 1 | 1 | 1 | 1 x | x | 0 | 0000/00/00 | 0 | 1 |
| 1 | 7.41  | 0 | 58 ant tongue    | 1 | 0 | 0 | 4 | 2   | 2 | 1 | 2015/3/27  | 1 | 2 |
| 1 | 56.36 | 1 | 55 buccal muco   | 1 | 0 | 0 | 1 | 1   | 0 | 0 | 0000/00/00 | 0 | 2 |
| 1 | 56.30 | 1 | 45 buccal muco   | 1 | 1 | 1 | 3 | 3   | 0 | 0 | 0000/00/00 | 0 | 2 |
| 1 | 56.26 | 1 | 41 buccal muco   | 0 | 0 | 0 | 1 | 1 x | x | 0 | 0000/00/00 | 0 | 2 |
| 1 | 56.16 | 1 | 55 buccal muco   | 1 | 0 | 1 | 4 | 4   | 0 | 0 | 0000/00/00 | 0 | 2 |
| 1 | 56.13 | 1 | 55 hard palate   | 0 | 0 | 0 | 2 | 2   | 0 | 0 | 0000/00/00 | 0 | 2 |
| 1 | 5.25  | 0 | 49 hard palate   | 1 | 1 |   | 4 | 4   | 1 | 1 | 0000/00/00 | 0 | 2 |
| 1 | 47.28 | 0 | 71 mouth floor   | 1 | 1 | 1 | 2 | 2   | 0 | 0 | 0000/00/00 | 0 | 3 |
| 1 | 56.36 | 1 | 70 ant tongue    | 1 | 0 | 1 | 2 | 2   | 0 | 0 | 0000/00/00 | 0 | 2 |
| 1 | 56.23 | 1 | 49 rmt           | 0 | 0 | 0 | 1 | 1   | 0 | 0 | 2015/1/3   | 1 | 1 |
| 1 | 56.10 | 1 | 58 hard palate   | 1 | 0 | 1 | 1 | 1   | 0 | 0 | 0000/00/00 | 0 | 2 |
| 1 | 56.13 | 1 | 47 buccal muco   | 1 | 0 | 1 | 1 | 1   | 0 | 0 | 0000/00/00 | 0 | 2 |
| 1 | 17.21 | 0 | 43 ant tongue    | 1 | 1 | 1 | 3 | 3   | 0 | 0 | 2015/7/6   | 1 | 2 |
| 1 | 44.00 | 0 | 42 lip           | 1 | 0 | 1 | 1 | 1   | 0 | 0 | 0000/00/00 | 0 | 2 |
| 1 | 59.15 | 1 | 50 alveolar ridg | 0 | 0 | 0 | 1 | 1   | 0 | 0 | 0000/00/00 | 0 | 1 |
| 1 | 56.13 | 1 | 52 ant tongue    | 1 | 0 | 1 | 1 | 1 x | x | 0 | 0000/00/00 | 0 | 2 |
| 1 | 57.38 | 1 | 47 alveolar ridg | 0 | 1 | 0 | 4 | 4   | 0 | 0 | 0000/00/00 | 0 | 2 |
| 1 | 48.92 | 0 | 56 alveolar ridg | 0 | 0 | 0 | 3 | 1   | 1 | 0 | 2014/10/1  | 1 | 2 |
| 1 | 5.61  | 0 | 58 alveolar ridg | 1 | 1 |   | 4 | 4 x | x | 0 | 2014/10/2  | 1 | 2 |
| 1 | 55.80 | 1 | 53 ant tongue    | 1 | 1 |   | 2 | 2   | 0 | 0 | 0000/00/00 | 0 | 2 |
| 1 | 55.70 | 1 | 76 buccal muco   | 0 | 1 | 0 | 1 | 1 x | x | 0 | 0000/00/00 | 0 | 1 |
| 1 | 55.80 | 1 | 43 ant tongue    | 1 | 1 | 1 | 4 | 4   | 1 | 0 | 0000/00/00 | 0 | 2 |
| 1 | 56.39 | 1 | 60 buccal muco   | 0 | 0 |   | 1 | 1   | 0 | 0 | 0000/00/00 | 0 | 2 |
| 1 | 10.26 | 0 | 53 buccal muco   | 0 | 0 |   | 2 | 2   | 0 | 0 | 0000/00/00 | 0 | 3 |
| 1 | 56.10 | 1 | 61 buccal muco   | 0 | 0 | 0 | 4 | 4   | 0 | 0 | 0000/00/00 | 0 | 2 |
| 1 | 18.03 | 0 | 36 ant tongue    | 1 | 0 | 1 | 4 | 4   | 1 | 1 | 0000/00/00 | 0 | 2 |
| 1 | 55.54 | 1 | 48 ant tongue    | 1 | 0 |   | 2 | 2   | 0 | 0 | 0000/00/00 | 0 | 2 |
| 1 | 57.28 | 1 | 54 alveolar ridg | 1 | 0 | 1 | 1 | 1   | 0 | 0 | 0000/00/00 | 0 | 1 |
| 1 | 55.44 | 1 | 39 buccal muco   | 1 | 1 | 1 | 3 | 2   | 1 | 0 | 0000/00/00 | 0 | 2 |
| 1 | 55.48 | 1 | 76 alveolar ridg | 0 | 1 | 1 | 4 | 4   | 0 | 0 | 0000/00/00 | 0 | 2 |
| 1 | 56.26 | 1 | 72 buccal muco   | 0 | 0 | 0 | 1 | 1 x | x | 0 | 0000/00/00 | 0 | 1 |
| 1 | 55.41 | 1 | 56 hard palate   | 1 | 1 |   | 1 | 1   | 0 | 0 | 0000/00/00 | 0 | 1 |
| 1 | 55.34 | 1 | 57 hard palate   | 1 | 1 | 0 | 1 | 1 x | x | 0 | 0000/00/00 | 0 | 2 |
| 1 | 37.44 | 0 | 61 ant tongue    | 1 | 0 | 1 | 1 | 1   | 0 | 0 | 0000/00/00 | 0 | 3 |
| 1 | 55.25 | 1 | 65 buccal muco   | 1 | 0 | 1 | 1 | 1   | 0 | 0 | 0000/00/00 | 0 | 1 |
| 1 | 55.41 | 1 | 55 ant tongue    | 1 | 1 | 1 | 3 | 2   | 1 | 0 | 0000/00/00 | 0 | 2 |
| 1 | 55.34 | 1 | 63 buccal muco   | 1 | 1 | 0 | 2 | 2 x | x | 0 | 2015/11/5  | 1 | 2 |
| 1 | 24.89 | 0 | 58 alveolar ridg | 1 | 1 | 0 | 4 | 4   | 0 | 0 | 0000/00/00 | 0 | 2 |
| 1 | 55.41 | 1 | 36 buccal muco   | 1 | 1 | 1 | 1 | 1 x | x | 0 | 0000/00/00 | 0 | 2 |
| 1 | 3.31  | 0 | 58 rmt           | 1 | 1 | 1 | 1 | 1   | 0 | 0 | 0000/00/00 | 0 | 2 |
| 1 | 43.11 | 0 | 42 lip           | 1 | 0 | 1 | 1 | 1   | 0 | 0 | 0000/00/00 | 0 | 2 |
| 1 | 54.98 | 1 | 50 lip           | 0 | 0 | 0 | 3 | 2   | 1 | 0 | 0000/00/00 | 0 | 2 |
| 1 | 55.80 | 1 | 79 ant tongue    | 0 | 0 | 1 | 2 | 2 x | x | 0 | 0000/00/00 | 0 | 2 |
| 1 | 43.11 | 0 | 42 buccal muco   | 1 | 0 | 1 | 1 | 1   | 0 | 0 | 0000/00/00 | 0 | 1 |
| 1 | 38.95 | 0 | 53 buccal muco   | 1 | 1 | 1 | 2 | 2   | 0 | 0 | 0000/00/00 | 0 | 2 |
| 1 | 25.84 | 0 | 63 buccal muco   | 1 | 0 | 0 | 1 | 1   | 0 | 0 | 0000/00/00 | 0 | 2 |
| 1 | 55.38 | 1 | 76 alveolar ridg | 0 | 1 | 0 | 1 | 1 x | x | 0 | 0000/00/00 | 0 | 1 |
| 1 | 54.95 | 1 | 48 ant tongue    | 1 | 1 |   | 1 | 1   | 0 | 0 | 0000/00/00 | 0 | 1 |
| 1 | 55.34 | 1 | 60 buccal muco   | 1 | 0 | 0 | 1 | 1 x | x | 0 | 0000/00/00 | 0 | 2 |
| 1 | 54.72 | 1 | 54 ant tongue    | 1 | 0 |   | 1 | 1 x | x | 0 | 2015/9/18  | 1 | 2 |
| 1 | 55.18 | 1 | 44 buccal muco   | 1 | 0 | 0 | 2 | 2   | 0 | 0 | 0000/00/00 | 0 | 2 |
| 1 | 54.66 | 1 | 65 buccal muco   | 1 | 0 | 1 | 1 | 1   | 0 | 0 | 0000/00/00 | 0 | 1 |
| 1 | 52.98 | 0 | 76 alveolar ridg | 1 | 1 | 0 | 2 | 2 x | x | 0 | 0000/00/00 | 0 | 2 |

|   |       |   |    |                |   |   |   |    |   |   |   |   |             |   |   |   |
|---|-------|---|----|----------------|---|---|---|----|---|---|---|---|-------------|---|---|---|
| 1 | 54.56 | 1 | 77 | alveolar ridge | 0 | 0 | 0 | 1  | 1 | x | x | 0 | 0000/00/00  | 0 | 1 | 0 |
| 1 | 54.56 | 1 | 65 | buccal muco    | 1 | 1 | 1 | 2  | 2 | 0 | 0 | 0 | 0000/00/00  | 0 | 3 | 0 |
| 1 | 54.56 | 1 | 56 | alveolar ridge | 1 | 1 | 1 | 4  | 4 | 0 | 0 | 0 | 0000/00/00  | 0 | 1 | 0 |
| 1 | 54.30 | 1 | 62 | buccal muco    | 0 | 0 | 1 | 1  | 1 | 0 | 0 | 0 | 0000/00/00  | 0 | 2 | 0 |
| 1 | 54.33 | 1 | 66 | alveolar ridge | 1 | 1 | 1 | 2  | 2 | 0 | 0 | 0 | 0000/00/00  | 0 | 2 | 0 |
| 1 | 54.43 | 1 | 74 | ant tongue     | 1 | 0 | 1 | 1  | 1 | 0 | 0 | 0 | 0000/00/00  | 0 | 2 | 0 |
| 1 | 54.49 | 1 | 62 | buccal muco    | 1 | 1 | 0 | 2  | 2 | 0 | 0 | 0 | 0000/00/00  | 0 | 1 | 0 |
| 1 | 54.23 | 1 | 52 | buccal muco    | 1 | 1 | 1 | 1  | 1 | 0 | 0 | 0 | 0000/00/00  | 0 | 2 | 0 |
| 1 | 12.43 | 0 | 77 | alveolar ridge | 1 | 1 | 0 | 4  | 4 | 0 | 0 | 0 | 0000/00/00  | 0 | 2 | 0 |
| 1 | 28.00 | 0 | 64 | buccal muco    | 1 | 1 | 1 | 1  | 1 | x | x | 0 | 2015/3/12   | 1 | 2 | 0 |
| 1 | 41.02 | 0 | 61 | hard palate    | 0 | 0 | 0 | 1  | 1 | x | x | 0 | 0000/00/00  | 0 | 2 | 0 |
| 1 | 54.66 | 1 | 60 | alveolar ridge | 1 | 0 | 0 | 1  | 1 | x | x | 0 | 0000/00/00  | 0 | 1 | 0 |
| 1 | 54.75 | 1 | 50 | alveolar ridge | 1 | 1 | 1 | 4  | 2 | 2 | 1 | 0 | 0000/00/00  | 0 | 2 | 1 |
| 1 | 30.75 | 0 | 57 | lip            | 1 | 1 | 0 | 4  | 2 | 2 | 0 | 0 | 0000/00/00  | 0 | 2 | 1 |
| 1 | 54.79 | 1 | 40 | mouth floor    | 1 | 0 | 1 | 1  | 1 | 0 | 0 | 0 | 0000/00/00  | 0 | 2 | 0 |
| 1 | 54.10 | 1 | 73 | ant tongue     | 1 | 0 | 1 | 3  | 3 | 0 | 0 | 0 | 0000/00/00  | 0 | 1 | 0 |
| 1 | 13.28 | 0 | 60 | alveolar ridge | 1 | 0 | 0 | 4  | 2 | 2 | 1 | 0 | 2015/5/20   | 1 | 1 | 1 |
| 1 | 54.56 | 1 | 49 | ant tongue     | 1 | 1 | 0 | 2  | 2 | 0 | 0 | 0 | 0000/00/00  | 0 | 2 | 0 |
| 1 | 13.44 | 0 | 67 | alveolar ridge | 1 | 1 | 1 | 1  | 1 | x | x | 0 | 0000/00/00  | 0 | 2 | 0 |
| 1 | 53.93 | 1 | 42 | alveolar ridge | 1 | 1 | 0 | 無法 | 1 | x | x | 0 | 0000/00/00  | 0 | 1 | 0 |
| 1 | 67.64 | 1 | 67 | alveolar ridge | 1 | 0 | 0 | 1  | 1 | x | x | 0 | 0000/00/00  | 0 | 1 | 0 |
| 1 | 14.66 | 0 | 50 | buccal muco    | 1 | 0 | 0 | 1  | 1 | x | x | 0 | 0000/00/00  | 0 | 2 | 0 |
| 1 | 30.23 | 0 | 66 | lip            | 0 | 0 | 0 | 1  | 1 | x | x | 0 | 0000/00/00  | 0 | 2 | 0 |
| 1 | 45.18 | 0 | 45 | ant tongue     | 0 | 0 | 0 | 2  | 2 | 0 | 0 | 0 | 2017/7/25   | 1 | 2 | 0 |
| 1 | 53.64 | 1 | 72 | lip            | 0 | 0 | 0 | 2  | 2 | 0 | 0 | 0 | 0000/00/00  | 0 | 2 | 0 |
| 1 | 53.64 | 1 | 44 | buccal muco    | 0 | 0 | 0 | 1  | 1 | 0 | 0 | 0 | 0000/00/00  | 0 | 2 | 0 |
| 1 | 13.48 | 0 | 50 | ant tongue     | 1 | 1 | 0 | 4  | 4 | 2 | 1 | 0 | 2015/9/24   | 1 | 3 | 1 |
| 1 | 53.57 | 1 | 35 | ant tongue     | 1 | 1 | 0 | 1  | 1 | 0 | 0 | 0 | 0000/00/00  | 0 | 2 | 0 |
| 1 | 53.57 | 1 | 61 | buccal muco    | 1 | 1 | 0 | 2  | 2 | x | x | 0 | 0000/00/00  | 0 | 2 | 0 |
| 1 | 53.57 | 1 | 78 | buccal muco    | 0 | 0 | 1 | 2  | 2 | 0 | 0 | 0 | 0000/00/00  | 0 | 2 | 0 |
| 1 | 53.57 | 1 | 81 | buccal muco    | 0 | 0 | 0 | 1  | 1 | 0 | 0 | 0 | 0000/00/00  | 0 | 1 | 0 |
| 1 | 53.51 | 1 | 73 | alveolar ridge | 0 | 0 | 0 | 4  | 4 | 0 | 0 | 0 | 0000/00/00  | 0 | 2 | 0 |
| 1 | 11.54 | 0 | 68 | alveolar ridge | 1 | 1 | 0 | 4  | 4 | 0 | 0 | 0 | 0000/00/00  | 0 | 2 | 0 |
| 1 | 53.48 | 1 | 52 | ant tongue     | 0 | 1 | 1 | 4  | 4 | 0 | 0 | 0 | 0000/00/00  | 0 | 2 | 0 |
| 1 | 53.41 | 1 | 59 | mouth floor    | 1 | 0 | 0 | 2  | 2 | 0 | 0 | 0 | 0000/00/00  | 0 | 2 | 0 |
| 1 | 53.38 | 1 | 45 | ant tongue     | 1 | 0 | 0 | 4  | 4 | 0 | 0 | 0 | 0000/00/00  | 0 | 2 | 0 |
| 1 | 55.70 | 1 | 63 | ant tongue     | 0 | 0 | 0 | 1  | 1 | x | x | 0 | 0000/00/00  | 0 | 1 | 0 |
| 1 | 53.28 | 1 | 63 | alveolar ridge | 1 | 0 | 1 | 1  | 1 | x | x | 0 | 0000/00/00  | 0 | 2 | 0 |
| 1 | 53.28 | 1 | 62 | ant tongue     | 1 | 1 | 1 | 4  | 4 | 0 | 0 | 0 | 0000/00/00  | 0 | 2 | 0 |
| 1 | 75.11 | 1 | 61 | alveolar ridge | 1 | 0 | 0 | 1  | 1 | 0 | 0 | 0 | 10000/00/00 | 0 | 2 | 0 |
| 1 | 74.39 | 1 | 50 | buccal muco    | 1 | 1 | 1 | 1  | 1 | 0 | 0 | 0 | 0000/00/00  | 0 | 2 | 0 |
| 1 | 6.30  | 0 | 67 | hard palate    | 1 | 1 | 0 | 無法 | 1 | x | x | 1 | 0000/00/00  | 0 | 2 | 0 |
| 1 | 53.57 | 1 | 54 | buccal muco    | 1 | 1 | 1 | 1  | 1 | x | x | 0 | 0000/00/00  | 0 | 2 | 0 |
| 1 | 29.97 | 0 | 57 | alveolar ridge | 1 | 1 | 0 | 4  | 4 | 2 | 0 | 0 | 0000/00/00  | 0 | 2 | 1 |
| 1 | 35.97 | 0 | 59 | ant tongue     | 0 | 1 | 0 | 1  | 1 | 0 | 0 | 0 | 2015/10/21  | 1 | 2 | 0 |
| 1 | 49.28 | 0 | 60 | alveolar ridge | 1 | 0 | 1 | 4  | 4 | 0 | 0 | 0 | 0000/00/00  | 0 | 2 | 0 |
| 1 | 52.89 | 1 | 65 | lip            | 0 | 0 | 0 | 1  | 1 | 0 | 0 | 0 | 0000/00/00  | 0 | 2 | 0 |
| 1 | 10.26 | 0 | 39 | ant tongue     | 0 | 0 | 0 | 1  | 1 | 0 | 0 | 0 | 0000/00/00  | 0 | 2 | 0 |
| 1 | 46.79 | 0 | 55 | buccal muco    | 1 | 0 | 0 | 3  | 3 | 0 | 0 | 0 | 0000/00/00  | 0 | 3 | 0 |
| 1 | 13.74 | 0 | 53 | alveolar ridge | 0 | 0 | 0 | 1  | 1 | x | x | 0 | 2015/3/27   | 1 | 2 | 0 |
| 1 | 52.69 | 1 | 51 | mouth floor    | 1 | 0 | 1 | 1  | 1 | x | x | 0 | 0000/00/00  | 0 | 2 | 0 |
| 1 | 26.07 | 0 | 41 | mouth floor    | 1 | 0 | 0 | 4  | 1 | 2 | 1 | 1 | 0000/00/00  | 0 | 3 | 1 |
| 1 | 52.66 | 1 | 66 | buccal muco    | 0 | 0 | 0 | 1  | 1 | 0 | 0 | 0 | 0000/00/00  | 0 | 1 | 0 |
| 1 | 52.49 | 1 | 57 | ant tongue     | 1 | 0 | 0 | 1  | 1 | 0 | 0 | 0 | 0000/00/00  | 0 | 3 | 0 |
| 1 | 23.31 | 0 | 82 | rmt            | 0 | 0 | 0 | 1  | 1 | x | x | 0 | 0000/00/00  | 0 | 2 | 0 |
| 1 | 52.26 | 1 | 58 | buccal muco    | 0 | 0 | 0 | 4  | 2 | 2 | 1 | 0 | 0000/00/00  | 0 | 2 | 1 |
| 1 | 53.28 | 1 | 71 | hard palate    | 0 | 0 | 0 | 3  | 3 | 0 | 0 | 0 | 0000/00/00  | 0 | 3 | 0 |
| 1 | 52.23 | 1 | 68 | alveolar ridge | 0 | 0 | 1 | 4  | 4 | 0 | 0 | 0 | 0000/00/00  | 0 | 1 | 0 |
| 1 | 52.13 | 1 | 54 | buccal muco    | 1 | 1 | 0 | 1  | 1 | 0 | 0 | 0 | 0000/00/00  | 0 | 2 | 0 |
| 1 | 34.62 | 0 | 63 | lip            | 1 | 0 | 0 | 1  | 1 | 0 | 0 | 0 | 0000/00/00  | 0 | 2 | 0 |
| 1 | 52.13 | 1 | 54 | lip            | 1 | 1 | 1 | 2  | 2 | 0 | 0 | 0 | 0000/00/00  | 0 | 2 | 0 |
| 1 | 13.25 | 0 | 75 | buccal muco    | 0 | 0 | 0 | 1  | 1 | x | x | 0 | 0000/00/00  | 0 | 2 | 0 |
| 1 | 52.13 | 1 | 43 | ant tongue     | 1 | 1 | 1 | 4  | 2 | 2 | 1 | 0 | 0000/00/00  | 0 | 2 | 1 |
| 1 | 52.03 | 1 | 63 | alveolar ridge | 0 | 0 | 0 | 4  | 4 | 0 | 0 | 0 | 2018/5/28   | 1 | 1 | 0 |
| 1 | 7.87  | 0 | 65 | ant tongue     | 0 | 0 | 0 | 4  | 3 | 2 | 1 | 0 | 2015/6/17   | 1 | 2 | 1 |
| 1 | 51.97 | 1 | 45 | buccal muco    | 1 | 1 | 1 | 1  | 1 | 0 | 0 | 0 | 0000/00/00  | 0 | 2 | 0 |
| 1 | 51.97 | 1 | 70 | alveolar ridge | 0 | 0 | 0 | 1  | 1 | x | x | 0 | 0000/00/00  | 0 | 2 | 0 |
| 1 | 52.26 | 1 | 60 | buccal muco    | 1 | 0 | 0 | 2  | 2 | 0 | 0 | 0 | 0000/00/00  | 0 | 2 | 0 |
| 1 | 52.39 | 1 | 72 | ant tongue     | 0 | 0 | 0 | 1  | 1 | x | x | 0 | 0000/00/00  | 0 | 2 | 0 |
| 1 | 51.80 | 1 | 55 | alveolar ridge | 1 | 0 | 0 | 1  | 1 | x | x | 0 | 0000/00/00  | 0 | 2 | 0 |
| 1 | 14.66 | 0 | 62 | rmt            | 0 | 0 | 0 | 1  | 1 | x | x | 0 | 2015/8/28   | 1 | 2 | 0 |
| 1 | 51.67 | 1 | 75 | alveolar ridge | 0 | 0 | 0 | 1  | 1 | x | x | 0 | 0000/00/00  | 0 | 2 | 0 |

|   |       |   |                   |   |   |      |   |     |   |   |              |   |   |   |
|---|-------|---|-------------------|---|---|------|---|-----|---|---|--------------|---|---|---|
| 1 | 45.84 | 0 | 50 lip            | 1 | 0 | 1    | 3 | 3   | 0 | 0 | 0 0000/00/00 | 0 | 2 | 0 |
| 1 | 51.51 | 1 | 61 ant tongue     | 0 | 0 | 0    | 1 | 1 x | x |   | 0 0000/00/00 | 0 | 1 |   |
| 1 | 33.15 | 0 | 66 buccal muco    | 1 | 0 | 1    | 3 | 3   | 1 | 0 | 1 0000/00/00 | 0 | 2 | 1 |
| 1 | 51.51 | 1 | 65 ant tongue     | 0 | 1 | 1    | 1 | 1 x | x |   | 0 0000/00/00 | 0 | 1 |   |
| 1 | 51.34 | 1 | 56 buccal muco    | 1 | 0 | 1    | 2 | 2   | 0 | 0 | 0 2015/8/4   | 1 | 2 | 0 |
| 1 | 20.98 | 0 | 67 ant tongue     | 1 | 1 | 1    | 4 | 4   | 0 | 0 | 0 0000/00/00 | 0 | 2 | 0 |
| 1 | 51.11 | 1 | 61 buccal muco    | 0 | 0 | 1    | 1 | 1   | 0 | 0 | 0 0000/00/00 | 0 | 2 | 0 |
| 1 | 51.11 | 1 | 51 ant tongue     | 0 | 0 | 0    | 1 | 1   | 0 | 0 | 0 0000/00/00 | 0 | 2 | 0 |
| 1 | 51.05 | 0 | 60 buccal muco    | 0 | 0 | 0    | 1 | 1 x | x |   | 0 0000/00/00 | 0 | 2 |   |
| 1 | 7.48  | 0 | 75 alveolar ridg  | 1 | 0 | 0    | 4 | 4   | 2 | 0 | 0 2015/8/11  | 1 | 2 | 1 |
| 1 | 51.51 | 1 | 61 alveolar ridge | 0 | 0 | 0    | 4 | 4 x | x |   | 0 0000/00/00 | 0 | 1 |   |
| 1 | 50.85 | 1 | 55 ant tongue     | 1 | 1 | 0    | 4 | 4   | 0 | 0 | 0 0000/00/00 | 0 | 2 | 0 |
| 1 | 51.77 | 1 | 41 buccal muco    | 0 | 0 | 0    | 1 | 1   | 0 | 0 | 0 0000/00/00 | 0 | 2 | 0 |
| 1 | 26.98 | 0 | 47 buccal muco    | 1 | 0 | 1    | 4 | 2   | 2 | 0 | 0 0000/00/00 | 0 | 2 | 1 |
| 1 | 50.79 | 1 | 69 buccal muco    | 1 | 0 | 1    | 1 | 1 x | x |   | 0 0000/00/00 | 0 | 2 |   |
| 1 | 50.79 | 1 | 53 alveolar ridg  | 1 | 0 | 1    | 4 | 2   | 2 | 0 | 0 0000/00/00 | 0 | 2 | 1 |
| 1 | 51.54 | 1 | 50 buccal muco    | 0 | 0 | 0    | 1 | 1   | 0 | 0 | 0 0000/00/00 | 0 | 1 | 0 |
| 1 | 50.66 | 1 | 60 rmt            | 1 | 0 | 1    | 2 | 2   | 0 | 0 | 0 0000/00/00 | 0 | 2 | 0 |
| 1 | 50.66 | 1 | 64 ant tongue     | 1 | 1 | 1    | 1 | 1   | 0 | 0 | 0 0000/00/00 | 0 | 2 | 0 |
| 1 | 50.66 | 1 | 48 ant tongue     | 1 | 0 | 0    | 4 | 4 x | x |   | 0 0000/00/00 | 0 | 2 |   |
| 1 | 52.00 | 1 | 61 lip            | 1 | 1 | 1    | 2 | 2   | 0 | 0 | 0 0000/00/00 | 0 | 2 | 0 |
| 1 | 8.49  | 0 | 59 alveolar ridge | 0 | 0 | 1    | 2 | 2   | 0 | 0 | 0 0000/00/00 | 0 | 2 | 0 |
| 1 | 50.62 | 1 | 55 alveolar ridge | 1 | 0 | 1    | 4 | 4   | 2 | 0 | 0 0000/00/00 | 0 | 2 | 1 |
| 1 | 50.98 | 1 | 53 buccal muco    | 0 | 0 | 0    | 3 | 1   | 1 | 0 | 0 0000/00/00 | 0 | 2 | 1 |
| 1 | 50.75 | 1 | 79 buccal muco    | 1 | 0 | 0    | 1 | 1 x | x |   | 0 0000/00/00 | 0 | 1 |   |
| 1 | 50.39 | 1 | 41 lip            | 1 | 0 | 1    | 2 | 2 x | x |   | 0 2017/4/6   | 1 | 2 |   |
| 1 | 51.51 | 1 | 48 ant tongue     | 1 | 1 | 1    | 3 | 3   | 0 | 0 | 0 0000/00/00 | 0 | 2 | 0 |
| 1 | 4.26  | 0 | 77 alveolar ridge | 0 | 0 | 0    | 4 | 1   | 2 | 1 | 0 0000/00/00 | 0 | 2 | 1 |
| 1 | 50.36 | 1 | 57 lip            | 0 | 0 | 0    | 1 | 1 x | x |   | 0 0000/00/00 | 0 | 1 |   |
| 1 | 50.89 | 1 | 62 buccal muco    | 0 | 0 | 0    | 2 | 2   | 0 | 0 | 0 0000/00/00 | 0 | 1 | 0 |
| 1 | 4.23  | 0 | 52 lip            | 1 | 0 | 0    | 2 | 2 x | x |   | 0 0000/00/00 | 0 | 3 |   |
| 1 | 50.13 | 1 | 70 buccal muco    | 0 | 0 | 0    | 1 | 1 x | x |   | 0 2015/9/16  | 1 | 2 |   |
| 1 | 50.13 | 1 | 57 ant tongue     | 1 | 0 | 0    | 1 | 1   | 0 | 0 | 0 0000/00/00 | 0 | 2 | 0 |
| 1 | 50.13 | 1 | 70 ant tongue     | 0 | 0 | 0    | 1 | 1   | 0 | 0 | 0 0000/00/00 | 0 | 2 | 0 |
| 1 | 50.16 | 1 | 41 ant tongue     | 1 | 1 | 1    | 1 | 1   | 0 | 0 | 0 0000/00/00 | 0 | 2 | 0 |
| 1 | 23.34 | 0 | 54 buccal muco    | 0 | 0 | 1    | 3 | 3   | 1 | 1 | 0 2015/12/30 | 1 | 3 | 1 |
| 1 | 50.16 | 1 | 56 buccal muco    | 0 | 0 | 1    | 1 | 1 x | x |   | 0 0000/00/00 | 0 | 1 |   |
| 1 | 52.89 | 1 | 78 buccal muco    | 0 | 0 | 0 無法 |   | 1 x | x |   | 0 2016/4/13  | 1 | 1 |   |
| 1 | 16.13 | 0 | 50 buccal muco    | 1 | 0 | 0    | 3 | 1   | 1 | 1 | 0 0000/00/00 | 0 | 3 | 1 |
| 1 | 49.97 | 1 | 60 buccal muco    | 0 | 0 | 0    | 1 | 1   | 0 | 0 | 0 0000/00/00 | 0 | 2 | 0 |
| 1 | 50.20 | 1 | 49 buccal muco    | 1 | 0 | 0    | 1 | 1   | 0 | 0 | 0 2015/8/18  | 1 | 2 | 0 |
| 1 | 50.13 | 1 | 83 alveolar ridge | 0 | 0 | 0    | 4 | 4   | 1 | 0 | 0 0000/00/00 | 0 | 2 | 1 |
| 1 | 18.95 | 0 | 62 buccal muco    | 1 | 1 | 1    | 1 | 1 x | x |   | 0 0000/00/00 | 0 | 2 |   |
| 1 | 50.52 | 1 | 73 rmt            | 0 | 0 | 0    | 4 | 4   | 0 | 0 | 0 0000/00/00 | 0 | 1 | 0 |
| 1 | 49.84 | 1 | 65 buccal muco    | 1 | 1 | 1    | 1 | 1 x | x |   | 0 0000/00/00 | 0 | 2 |   |
| 1 | 49.84 | 1 | 66 buccal muco    | 1 | 0 | 0    | 1 | 1   | 0 | 0 | 0 0000/00/00 | 0 | 2 | 0 |
| 1 | 36.85 | 0 | 46 ant tongue     | 1 | 1 | 1    | 2 | 2   | 0 | 0 | 0 0000/00/00 | 0 | 2 | 0 |
| 1 | 50.52 | 1 | 58 alveolar ridg  | 0 | 0 | 0    | 4 | 4   | 0 | 0 | 0 0000/00/00 | 0 | 2 | 0 |
| 1 | 52.23 | 1 | 72 alveolar ridge | 0 | 0 | 0    | 2 | 2   | 0 | 0 | 0 0000/00/00 | 0 | 1 | 0 |
| 1 | 49.67 | 1 | 60 hard palate    | 1 | 1 | 1    | 1 | 1 x | x |   | 0 0000/00/00 | 0 | 2 |   |
| 1 | 49.38 | 1 | 54 buccal muco    | 1 | 0 | 1    | 1 | 1 x | x |   | 0 0000/00/00 | 0 | 2 |   |
| 1 | 19.31 | 0 | 62 buccal muco    | 0 | 0 | 0    | 4 | 4   | 0 | 0 | 0 0000/00/00 | 0 | 2 | 0 |
| 1 | 49.48 | 1 | 64 ant tongue     | 0 | 1 | 1    | 4 | 4   | 2 | 1 | 0 0000/00/00 | 0 | 2 | 1 |
| 1 | 49.41 | 1 | 54 buccal muco    | 1 | 0 | 0    | 1 | 1 x | x |   | 0 0000/00/00 | 0 | 2 |   |
| 1 | 21.77 | 0 | 36 alveolar ridg  | 1 | 0 | 1    | 4 | 4   | 2 | 1 | 0 2015/11/17 | 1 | 2 | 1 |
| 1 | 49.21 | 1 | 54 buccal muco    | 1 | 1 | 1    | 1 | 1 x | x |   | 0 0000/00/00 | 0 | 1 |   |
| 1 | 49.44 | 1 | 55 buccal muco    | 1 | 0 | 0    | 1 | 1   | 0 | 0 | 0 0000/00/00 | 0 | 2 | 0 |
| 1 | 49.11 | 1 | 77 lip            | 1 | 1 | 0    | 2 | 2   | 0 | 0 | 0 0000/00/00 | 0 | 2 | 0 |
| 1 | 49.11 | 1 | 43 ant tongue     | 1 | 1 | 1    | 3 | 1   | 1 | 1 | 0 0000/00/00 | 0 | 2 | 1 |
| 1 | 49.15 | 1 | 46 buccal muco    | 1 | 1 | 1    | 1 | 1   | 0 | 0 | 0 0000/00/00 | 0 | 2 | 0 |
| 1 | 49.38 | 1 | 50 rmt            | 0 | 0 | 0 無法 |   | 1 x | x |   | 0 0000/00/00 | 0 | 2 |   |
| 1 | 49.21 | 1 | 47 alveolar ridg  | 1 | 1 | 1    | 2 | 2   | 0 | 0 | 0 2015/10/30 | 1 | 2 | 0 |
| 1 | 48.92 | 1 | 70 buccal muco    | 1 | 1 | 1    | 2 | 2   | 0 | 0 | 0 0000/00/00 | 0 | 2 | 0 |
| 1 | 49.34 | 1 | 42 ant tongue     | 1 | 0 | 1    | 2 | 2   | 0 | 0 | 0 0000/00/00 | 0 | 2 | 0 |
| 1 | 49.51 | 1 | 71 ant tongue     | 1 | 1 | 0    | 1 | 1   | 0 | 0 | 0 0000/00/00 | 0 | 2 | 0 |
| 1 | 21.31 | 0 | 81 rmt            | 0 | 0 | 0    | 4 | 4   | 0 | 0 | 0 2015/10/23 | 1 | 2 | 0 |
| 1 | 19.21 | 0 | 59 buccal muco    | 1 | 1 | 1    | 4 | 1   | 2 | 1 | 0 2015/10/14 | 1 | 2 | 1 |
| 1 | 15.28 | 0 | 63 mouth floor    | 1 | 1 | 1    | 3 | 2   | 1 | 0 | 0 0000/00/00 | 0 | 2 | 1 |
| 1 | 48.89 | 1 | 54 lip            | 1 | 0 | 0    | 1 | 1 x | x |   | 0 0000/00/00 | 0 | 1 |   |
| 1 | 9.11  | 0 | 64 alveolar ridge | 1 | 1 | 1    | 4 | 4   | 2 | 1 | 0 2016/1/27  | 1 | 2 | 1 |
| 1 | 48.69 | 1 | 72 buccal muco    | 1 | 1 | 1    | 1 | 1   | 0 | 0 | 0 0000/00/00 | 0 | 1 | 0 |
| 1 | 48.49 | 1 | 48 mouth floor    | 1 | 1 | 1    | 1 | 1   | 0 | 0 | 0 0000/00/00 | 0 | 2 | 0 |

|   |       |   |    |                |   |   |    |   |     |   |   |   |            |   |   |   |
|---|-------|---|----|----------------|---|---|----|---|-----|---|---|---|------------|---|---|---|
| 1 | 45.28 | 0 | 76 | alveolar ridge | 1 | 1 | 1  | 4 | 4   | 0 | 0 | 0 | 0000/00/00 | 0 | 2 | 0 |
| 1 | 48.59 | 1 | 57 | buccal muco    | 1 | 1 |    | 1 | 1   | 0 | 0 | 0 | 0000/00/00 | 0 | 2 | 0 |
| 1 | 48.82 | 1 | 47 | buccal muco    | 1 | 1 |    | 1 | 1 x | x |   | 0 | 0000/00/00 | 0 | 1 |   |
| 1 | 48.66 | 1 | 41 | ant tongue     | 1 | 1 | 1  | 3 | 1   | 1 | 1 | 0 | 2017/12/19 | 1 | 3 | 1 |
| 1 | 42.03 | 0 | 62 | alveolar ridge | 0 | 0 | 1  | 3 | 1   | 1 | 1 | 0 | 0000/00/00 | 0 | 3 | 1 |
| 1 | 48.33 | 1 | 55 | ant tongue     | 1 | 1 | 0  | 4 | 4   | 0 | 0 | 0 | 0000/00/00 | 0 | 3 | 0 |
| 1 | 22.26 | 0 | 79 | buccal muco    | 1 | 1 |    | 2 | 2   | 0 | 0 | 0 | 2016/9/9   | 1 | 2 | 0 |
| 1 | 48.33 | 1 | 56 | mouth floor    | 1 | 1 | 1  | 4 | 4   | 2 | 1 | 0 | 0000/00/00 | 0 | 3 | 1 |
| 1 | 21.38 | 0 | 68 | buccal muco    | 1 | 1 | 1  | 2 | 2   | 0 | 0 | 0 | 0000/00/00 | 0 | 2 | 0 |
| 1 | 49.84 | 1 | 58 | buccal muco    | 1 | 0 |    | 3 | 2   | 1 | 0 | 0 | 0000/00/00 | 0 | 2 | 1 |
| 1 | 19.90 | 0 | 64 | ant tongue     | 1 | 1 | 0  | 1 | 1   | 0 | 0 | 0 | 2016/1/4   | 1 | 2 | 0 |
| 1 | 5.05  | 0 | 49 | alveolar ridge | 1 | 1 |    | 4 | 4   | 2 | 1 | 0 | 0000/00/00 | 0 | 2 | 1 |
| 1 | 15.21 | 0 | 44 | alveolar ridge | 1 | 1 | 1  | 4 | 4 x | x |   | 0 | 0000/00/00 | 0 | 2 |   |
| 1 | 47.97 | 1 | 53 | alveolar ridge | 1 | 1 | 0  | 1 | 1 x | x |   | 0 | 0000/00/00 | 0 | 1 |   |
| 1 | 47.84 | 1 | 45 | buccal muco    | 1 | 1 | 0  | 1 | 1   | 0 | 0 | 0 | 0000/00/00 | 0 | 2 | 0 |
| 1 | 14.46 | 0 | 57 | ant tongue     | 1 | 0 | 0  | 4 | 4 x | x |   | 0 | 0000/00/00 | 0 | 2 |   |
| 1 | 22.20 | 0 | 47 | alveolar ridge | 1 | 1 | 1  | 4 | 4   | 0 | 0 | 0 | 0000/00/00 | 0 | 3 | 0 |
| 1 | 47.84 | 1 | 49 | lip            | 1 | 1 | 1  | 1 | 1 x | x |   | 0 | 0000/00/00 | 0 | 1 |   |
| 1 | 48.30 | 1 | 56 | alveolar ridge | 1 | 1 | 1  | 1 | 1   | 0 | 0 | 0 | 0000/00/00 | 0 | 2 | 0 |
| 1 | 11.15 | 0 | 42 | ant tongue     | 1 | 1 | 1  | 4 | 4   | 0 | 0 | 0 | 0000/00/00 | 0 | 2 | 0 |
| 1 | 28.72 | 0 | 60 | buccal muco    | 1 | 1 | 1  | 3 | 2   | 1 | 0 | 0 | 0000/00/00 | 0 | 2 | 1 |
| 1 | 47.64 | 1 | 63 | rmt            | 1 | 1 | 1  | 1 | 1   | 0 | 0 | 0 | 0000/00/00 | 0 | 2 | 0 |
| 1 | 47.67 | 1 | 46 | ant tongue     | 1 | 1 | 無法 |   | 1 x | x |   | 0 | 0000/00/00 | 0 | 2 |   |
| 1 | 47.54 | 1 | 50 | alveolar ridge | 1 | 1 | 1  | 4 | 4   | 0 | 0 | 0 | 0000/00/00 | 0 | 2 | 0 |
| 1 | 47.61 | 1 | 60 | buccal muco    | 1 | 1 |    | 1 | 1 x | x |   | 0 | 0000/00/00 | 0 | 1 |   |
| 1 | 48.00 | 1 | 50 | ant tongue     | 1 | 1 | 1  | 2 | 2   | 0 | 0 | 0 | 0000/00/00 | 0 | 3 | 0 |
| 1 | 47.41 | 1 | 44 | buccal muco    | 1 | 1 | 1  | 2 | 2   | 0 | 0 | 0 | 0000/00/00 | 0 | 2 | 0 |
| 1 | 12.92 | 0 | 61 | ant tongue     | 0 | 0 | 1  | 4 | 2   | 2 | 1 | 0 | 2016/5/5   | 1 | 2 | 1 |
| 1 | 47.97 | 1 | 67 | lip            | 1 | 1 | 0  | 1 | 1   | 0 | 0 | 0 | 0000/00/00 | 0 | 1 | 0 |
| 1 | 47.31 | 1 | 84 | alveolar ridge | 1 | 1 | 1  | 1 | 1 x | x |   | 0 | 0000/00/00 | 0 | 1 |   |
| 1 | 47.87 | 1 | 56 | ant tongue     | 1 | 1 | 0  | 1 | 1 x | x |   | 0 | 0000/00/00 | 0 | 2 |   |
| 1 | 47.31 | 1 | 54 | buccal muco    | 1 | 1 | 1  | 4 | 4   | 0 | 0 | 0 | 0000/00/00 | 0 | 1 | 0 |
| 1 | 48.59 | 1 | 56 | buccal muco    | 1 | 1 | 1  | 4 | 4   | 1 | 1 | 0 | 0000/00/00 | 0 | 2 | 1 |
| 1 | 42.49 | 0 | 56 | alveolar ridge | 1 | 1 | 0  | 4 | 4   | 0 | 0 | 0 | 0000/00/00 | 0 | 2 | 0 |
| 1 | 45.64 | 0 | 77 | ant tongue     | 1 | 1 | 0  | 4 | 4 x | x |   | 0 | 0000/00/00 | 0 | 2 |   |
| 1 | 47.05 | 1 | 58 | alveolar ridge | 1 | 0 | 0  | 4 | 4   | 0 | 0 | 0 | 0000/00/00 | 0 | 2 | 0 |
| 1 | 9.11  | 0 | 74 | buccal muco    | 1 | 1 | 1  | 2 | 2 x | x |   | 0 | 0000/00/00 | 0 | 2 |   |
| 1 | 47.97 | 1 | 67 | alveolar ridge | 1 | 1 | 1  | 1 | 1 x | x |   | 0 | 0000/00/00 | 0 | 1 |   |
| 1 | 20.23 | 0 | 47 | ant tongue     | 1 | 1 | 1  | 1 | 1   | 0 | 0 | 0 | 0000/00/00 | 0 | 2 | 0 |
| 1 | 46.85 | 1 | 40 | buccal muco    | 1 | 1 | 1  | 4 | 4   | 2 | 0 | 0 | 0000/00/00 | 0 | 2 | 1 |
| 1 | 47.87 | 1 | 53 | ant tongue     | 1 | 0 | 0  | 1 | 1 x | x |   | 0 | 2015/8/24  | 1 | 1 |   |
| 1 | 50.49 | 1 | 63 | buccal muco    | 0 | 0 |    | 1 | 1 x | x |   | 0 | 2016/9/29  | 1 | 1 |   |
| 1 | 22.30 | 0 | 49 | ant tongue     | 1 | 1 | 1  | 2 | 2 x | x |   | 0 | 0000/00/00 | 0 | 3 |   |
| 1 | 46.69 | 1 | 60 | buccal muco    | 1 | 1 | 1  | 1 | 1   | 0 | 0 | 0 | 0000/00/00 | 0 | 1 | 0 |
| 1 | 46.52 | 1 | 62 | buccal muco    | 1 | 1 | 0  | 1 | 1 x | x |   | 0 | 0000/00/00 | 0 | 1 |   |
| 1 | 47.18 | 1 | 73 | ant tongue     | 1 | 0 | 1  | 1 | 1 x | x |   | 0 | 0000/00/00 | 0 | 2 |   |
| 1 | 46.69 | 1 | 53 | ant tongue     | 1 | 1 |    | 4 | 4   | 2 | 1 | 0 | 0000/00/00 | 0 | 2 | 1 |
| 1 | 46.46 | 1 | 59 | buccal muco    | 0 | 1 |    | 1 | 1 x | x |   | 0 | 0000/00/00 | 0 | 2 |   |
| 1 | 46.46 | 1 | 56 | buccal muco    | 1 | 1 | 1  | 1 | 1 x | x |   | 0 | 0000/00/00 | 0 | 1 |   |
| 1 | 46.72 | 1 | 75 | buccal muco    | 1 | 1 | 1  | 1 | 1   | 0 | 0 | 0 | 0000/00/00 | 0 | 2 | 0 |
| 1 | 46.49 | 1 | 70 | mouth floor    | 1 | 1 |    | 1 | 1 x | x |   | 0 | 2016/5/2   | 1 | 2 |   |
| 1 | 46.49 | 1 | 73 | ant tongue     | 1 | 1 | 0  | 1 | 1   | 0 | 0 | 0 | 0000/00/00 | 0 | 2 | 0 |
| 1 | 46.26 | 1 | 61 | ant tongue     | 1 | 1 | 1  | 2 | 2   | 0 | 0 | 0 | 0000/00/00 | 0 | 3 | 0 |
| 1 | 46.46 | 1 | 65 | lip            | 1 | 1 | 1  | 1 | 1   | 0 | 0 | 0 | 0000/00/00 | 0 | 2 | 0 |
| 1 | 20.56 | 0 | 84 | ant tongue     | 1 | 1 | 無法 |   | 1 x | x |   | 0 | 0000/00/00 | 0 | 2 |   |
| 1 | 47.08 | 1 | 77 | ant tongue     | 0 | 1 | 0  | 2 | 2 x | x |   | 0 | 0000/00/00 | 0 | 2 |   |
| 1 | 46.16 | 1 | 62 | alveolar ridge | 1 | 1 | 1  | 2 | 2   | 0 | 0 | 0 | 2018/2/13  | 1 | 2 | 0 |
| 1 | 6.26  | 0 | 60 | alveolar ridge | 1 | 1 |    | 4 | 4 x | x |   | 1 | 0000/00/00 | 0 | 2 |   |
| 1 | 46.03 | 1 | 54 | buccal muco    | 1 | 1 | 1  | 4 | 4   | 2 | 1 | 0 | 0000/00/00 | 0 | 2 | 1 |
| 1 | 46.46 | 1 | 55 | lip            | 1 | 1 | 1  | 1 | 1   | 0 | 0 | 0 | 0000/00/00 | 0 | 1 | 0 |
| 1 | 6.03  | 0 | 50 | ant tongue     | 1 | 1 | 1  | 1 | 1   | 0 | 0 | 0 | 2015/10/19 | 1 | 2 | 0 |
| 1 | 46.46 | 1 | 55 | buccal muco    | 1 | 1 | 1  | 1 | 1   | 0 | 0 | 0 | 0000/00/00 | 0 | 1 | 0 |
| 1 | 46.16 | 1 | 48 | buccal muco    | 1 | 1 | 1  | 3 | 3   | 0 | 0 | 0 | 0000/00/00 | 0 | 2 | 0 |
| 1 | 47.90 | 1 | 63 | alveolar ridge | 1 | 1 | 無法 |   | 3 x | x |   | 0 | 0000/00/00 | 0 | 3 |   |
| 1 | 37.74 | 0 | 66 | alveolar ridge | 1 | 1 | 0  | 4 | 4 x | x |   | 0 | 0000/00/00 | 0 | 2 |   |
| 1 | 45.80 | 1 | 54 | alveolar ridge | 1 | 1 | 1  | 2 | 2   | 0 | 0 | 0 | 0000/00/00 | 0 | 2 | 0 |
| 1 | 10.43 | 0 | 68 | alveolar ridge | 1 | 1 | 1  | 4 | 4   | 2 | 0 | 0 | 0000/00/00 | 0 | 2 | 1 |
| 1 | 46.00 | 1 | 64 | lip            | 0 | 1 | 1  | 1 | 1 x | x |   | 0 | 0000/00/00 | 0 | 2 |   |
| 1 | 45.74 | 1 | 46 | buccal muco    | 1 | 1 | 1  | 1 | 1   | 0 | 0 | 0 | 0000/00/00 | 0 | 2 | 0 |
| 1 | 46.00 | 1 | 64 | buccal muco    | 0 | 1 | 1  | 1 | 1 x | x |   | 0 | 0000/00/00 | 0 | 2 |   |
| 1 | 18.98 | 0 | 41 | ant tongue     | 1 | 0 |    | 4 | 4 x | x |   | 0 | 2016/3/9   | 1 | 3 |   |
| 1 | 28.46 | 0 | 66 | alveolar ridge | 1 | 1 |    | 2 | 2 x | x |   | 0 | 0000/00/00 | 0 | 2 |   |

|   |       |   |    |                |   |   |    |   |     |   |   |             |   |   |   |
|---|-------|---|----|----------------|---|---|----|---|-----|---|---|-------------|---|---|---|
| 1 | 32.75 | 0 | 49 | ant tongue     | 1 | 1 | 1  | 1 | 0   | 0 | 0 | 2016/3/4    | 1 | 2 | 0 |
| 1 | 45.31 | 1 | 57 | ant tongue     | 0 | 0 | 1  | 1 | 1 x | x | 0 | 0000/00/00  | 0 | 1 | 1 |
| 1 | 45.38 | 1 | 40 | rmt            | 1 | 1 | 1  | 1 | 1 x | x | 0 | 2017/11/25  | 1 | 2 | 0 |
| 1 | 45.48 | 1 | 46 | ant tongue     | 1 | 1 | 0  | 4 | 4   | 0 | 0 | 0000/00/00  | 0 | 2 | 0 |
| 1 | 45.57 | 1 | 58 | buccal muco    | 1 | 0 | 1  | 2 | 2   | 0 | 0 | 0000/00/00  | 0 | 2 | 0 |
| 1 | 45.67 | 1 | 40 | ant tongue     | 1 | 1 | 0  | 4 | 3   | 2 | 0 | 0000/00/00  | 0 | 2 | 1 |
| 1 | 29.34 | 0 | 63 | rmt            | 1 | 1 | 0  | 1 | 1   | 0 | 0 | 2016/3/21   | 1 | 2 | 0 |
| 1 | 45.25 | 1 | 57 | buccal muco    | 1 | 1 | 1  | 4 | 4   | 1 | 1 | 0000/00/00  | 0 | 2 | 1 |
| 1 | 45.28 | 1 | 61 | alveolar ridgr | 1 | 1 | 0  | 1 | 1 x | x | 0 | 0000/00/00  | 0 | 2 | 0 |
| 1 | 58.62 | 1 | 58 | hard palate    | 1 | 1 | 1  | 1 | 1   | 0 | 0 | 0000/00/00  | 0 | 1 | 0 |
| 1 | 58.62 | 1 | 58 | lip            | 1 | 1 | 1  | 1 | 1   | 0 | 0 | 0000/00/00  | 0 | 1 | 0 |
| 1 | 12.20 | 0 | 55 | lip            | 1 | 1 | 1  | 1 | 1 x | x | 0 | 0000/00/00  | 0 | 2 | 0 |
| 1 | 45.05 | 1 | 57 | rmt            | 1 | 1 | 1  | 1 | 1 x | x | 0 | 2016/1/13   | 1 | 3 | 0 |
| 1 | 46.26 | 1 | 37 | buccal muco    | 1 | 1 | 1  | 4 | 4   | 0 | 0 | 0000/00/00  | 0 | 2 | 0 |
| 1 | 44.98 | 1 | 44 | ant tongue     | 1 | 1 | 1  | 4 | 4   | 2 | 1 | 0000/00/00  | 0 | 2 | 1 |
| 1 | 22.26 | 0 | 51 | ant tongue     | 1 | 1 | 1  | 1 | 1   | 0 | 0 | 2016/2/15   | 1 | 2 | 0 |
| 1 | 45.25 | 1 | 41 | alveolar ridgr | 1 | 1 | 1  | 4 | 4 x | x | 0 | 0000/00/00  | 0 | 2 | 0 |
| 1 | 45.31 | 1 | 51 | alveolar ridgr | 1 | 1 | 無法 | 1 | 1 x | x | 0 | 0000/00/00  | 0 | 2 | 0 |
| 1 | 5.05  | 0 | 76 | lip            | 1 | 1 | 1  | 4 | 3   | 2 | 1 | 2015/10/24  | 1 | 3 | 1 |
| 1 | 44.92 | 1 | 42 | ant tongue     | 1 | 0 | 0  | 4 | 4   | 0 | 0 | 0000/00/00  | 0 | 2 | 0 |
| 1 | 6.79  | 0 | 76 | alveolar ridgr | 1 | 0 | 0  | 1 | 1 x | x | 0 | 2015/12/4   | 1 | 2 | 0 |
| 1 | 62.07 | 1 | 44 | buccal muco    | 1 | 0 | 0  | 1 | 1   | 0 | 0 | 0000/00/00  | 0 | 2 | 0 |
| 1 | 59.93 | 1 | 43 | rmt            | 1 | 1 | 1  | 4 | 4   | 0 | 0 | 0000/00/00  | 0 | 2 | 0 |
| 1 | 44.66 | 1 | 57 | buccal muco    | 1 | 1 | 1  | 4 | 2   | 2 | 0 | 0000/00/00  | 0 | 2 | 1 |
| 1 | 44.79 | 1 | 45 | buccal muco    | 1 | 1 | 1  | 2 | 2   | 0 | 0 | 0000/00/00  | 0 | 2 | 0 |
| 1 | 44.62 | 1 | 63 | lip            | 1 | 1 | 1  | 1 | 1 x | x | 0 | 0000/00/00  | 0 | 1 | 0 |
| 1 | 44.52 | 1 | 74 | lip            | 1 | 1 | 1  | 2 | 2   | 0 | 0 | 0000/00/00  | 0 | 2 | 0 |
| 1 | 44.46 | 1 | 56 | ant tongue     | 1 | 1 | 1  | 4 | 4   | 0 | 0 | 0000/00/00  | 0 | 1 | 0 |
| 1 | 44.66 | 1 | 64 | ant tongue     | 1 | 0 | 0  | 2 | 2   | 0 | 0 | 0000/00/00  | 0 | 2 | 0 |
| 1 | 57.05 | 1 | 59 | lip            | 1 | 1 | 1  | 1 | 1   | 0 | 0 | 0000/00/00  | 0 | 2 | 0 |
| 1 | 44.33 | 1 | 43 | buccal muco    | 1 | 1 | 1  | 4 | 2   | 2 | 1 | 0000/00/00  | 0 | 2 | 1 |
| 1 | 44.33 | 1 | 47 | ant tongue     | 1 | 1 | 1  | 4 | 4   | 0 | 0 | 0000/00/00  | 0 | 2 | 0 |
| 1 | 44.62 | 1 | 61 | buccal muco    | 1 | 1 | 0  | 4 | 4   | 0 | 0 | 0000/00/00  | 0 | 2 | 0 |
| 1 | 14.30 | 0 | 53 | ant tongue     | 1 | 1 | 1  | 4 | 4   | 0 | 0 | 2016/5/16   | 1 | 2 | 0 |
| 1 | 44.33 | 1 | 50 | alveolar ridgr | 1 | 1 | 0  | 1 | 1 x | x | 0 | 0000/00/00  | 0 | 2 | 0 |
| 1 | 58.43 | 1 | 50 | ant tongue     | 0 | 0 | 0  | 1 | 1   | 0 | 0 | 0000/00/00  | 0 | 1 | 0 |
| 1 | 41.41 | 0 | 79 | buccal muco    | 1 | 1 | 1  | 2 | 2   | 0 | 0 | 0000/00/00  | 0 | 2 | 0 |
| 1 | 6.95  | 0 | 48 | ant tongue     | 1 | 1 | 1  | 4 | 4   | 2 | 1 | 2016/3/18   | 1 | 2 | 1 |
| 1 | 43.87 | 1 | 57 | buccal muco    | 1 | 1 | 0  | 1 | 1   | 0 | 0 | 0000/00/00  | 0 | 2 | 0 |
| 1 | 2.92  | 0 | 46 | ant tongue     | 1 | 1 | 1  | 4 | 4   | 2 | 1 | 10000/00/00 | 0 | 2 | 1 |
| 1 | 8.69  | 0 | 58 | alveolar ridgr | 1 | 1 | 1  | 4 | 4 x | x | 0 | 2016/3/3    | 1 | 2 | 0 |
| 1 | 43.77 | 1 | 56 | lip            | 1 | 1 | 1  | 1 | 1 x | x | 0 | 0000/00/00  | 0 | 1 | 0 |
| 1 | 44.20 | 1 | 73 | buccal muco    | 1 | 1 | 1  | 2 | 2 x | x | 0 | 0000/00/00  | 0 | 1 | 0 |
| 1 | 7.54  | 0 | 61 | buccal muco    | 0 | 0 | 0  | 4 | 4 x | x | 0 | 0000/00/00  | 0 | 2 | 0 |
| 1 | 43.70 | 1 | 53 | buccal muco    | 1 | 1 | 1  | 2 | 2   | 0 | 0 | 0000/00/00  | 0 | 2 | 0 |
| 1 | 43.64 | 1 | 48 | ant tongue     | 1 | 1 | 1  | 1 | 1 x | x | 0 | 0000/00/00  | 0 | 2 | 0 |
| 1 | 43.87 | 1 | 56 | alveolar ridgr | 1 | 1 | 1  | 2 | 2 x | x | 0 | 0000/00/00  | 0 | 2 | 0 |
| 1 | 19.90 | 0 | 57 | rmt            | 1 | 1 | 1  | 4 | 4   | 0 | 0 | 2016/5/10   | 1 | 2 | 0 |
| 1 | 43.31 | 1 | 54 | buccal muco    | 1 | 1 | 0  | 4 | 2   | 2 | 0 | 0000/00/00  | 0 | 2 | 1 |
| 1 | 43.31 | 1 | 69 | lip            | 0 | 0 | 0  | 2 | 2   | 0 | 0 | 0000/00/00  | 0 | 2 | 0 |
| 1 | 43.54 | 1 | 42 | buccal muco    | 1 | 1 | 1  | 2 | 2   | 0 | 0 | 0000/00/00  | 0 | 2 | 0 |
| 1 | 43.70 | 1 | 62 | ant tongue     | 1 | 1 | 0  | 1 | 1   | 0 | 0 | 0000/00/00  | 0 | 1 | 0 |
| 1 | 43.54 | 1 | 62 | hard palate    | 1 | 0 | 無法 | 1 | 1 x | x | 0 | 0000/00/00  | 0 | 2 | 0 |
| 1 | 43.54 | 1 | 40 | ant tongue     | 1 | 1 | 0  | 4 | 4   | 1 | 0 | 10000/00/00 | 0 | 2 | 1 |
| 1 | 43.48 | 1 | 64 | lip            | 1 | 1 | 1  | 2 | 2   | 0 | 0 | 0000/00/00  | 0 | 2 | 0 |
| 1 | 43.25 | 1 | 65 | ant tongue     | 1 | 1 | 0  | 1 | 1   | 0 | 0 | 0000/00/00  | 0 | 2 | 0 |
| 1 | 43.77 | 1 | 70 | ant tongue     | 1 | 1 | 0  | 2 | 2   | 0 | 0 | 0000/00/00  | 0 | 2 | 0 |
| 1 | 43.18 | 1 | 39 | ant tongue     | 1 | 1 | 1  | 1 | 1   | 0 | 0 | 0000/00/00  | 0 | 2 | 0 |
| 1 | 43.08 | 1 | 60 | ant tongue     | 1 | 1 | 1  | 3 | 1   | 1 | 0 | 0000/00/00  | 0 | 2 | 1 |
| 1 | 37.25 | 0 | 52 | alveolar ridgr | 1 | 1 | 1  | 2 | 2   | 0 | 0 | 0000/00/00  | 0 | 2 | 0 |
| 1 | 43.97 | 1 | 54 | ant tongue     | 1 | 0 | 1  | 1 | 1 x | x | 0 | 0000/00/00  | 0 | 1 | 0 |
| 1 | 43.48 | 1 | 59 | ant tongue     | 1 | 1 | 1  | 3 | 3   | 0 | 0 | 0000/00/00  | 0 | 2 | 0 |
| 1 | 42.98 | 1 | 56 | rmt            | 1 | 1 | 1  | 2 | 2   | 0 | 0 | 0000/00/00  | 0 | 2 | 0 |
| 1 | 42.95 | 1 | 56 | lip            | 1 | 1 | 1  | 1 | 1 x | x | 0 | 0000/00/00  | 0 | 2 | 0 |
| 1 | 43.74 | 1 | 43 | ant tongue     | 1 | 1 | 1  | 4 | 4   | 0 | 0 | 0000/00/00  | 0 | 3 | 0 |
| 1 | 43.21 | 1 | 59 | buccal muco    | 1 | 1 | 1  | 2 | 2   | 0 | 0 | 0000/00/00  | 0 | 2 | 0 |
| 1 | 42.98 | 1 | 31 | buccal muco    | 1 | 1 | 0  | 4 | 4   | 1 | 1 | 0000/00/00  | 0 | 1 | 1 |
| 1 | 43.51 | 1 | 70 | lip            | 1 | 1 | 0  | 1 | 1 x | x | 0 | 2016/6/29   | 1 | 1 | 0 |
| 1 | 43.28 | 1 | 58 | ant tongue     | 0 | 1 | 0  | 1 | 1 x | x | 0 | 0000/00/00  | 0 | 2 | 0 |
| 1 | 42.59 | 1 | 60 | ant tongue     | 1 | 1 | 1  | 1 | 1   | 0 | 0 | 0000/00/00  | 0 | 2 | 0 |
| 1 | 19.90 | 0 | 51 | rmt            | 1 | 1 | 1  | 1 | 1 x | x | 0 | 0000/00/00  | 0 | 2 | 0 |
| 1 | 36.10 | 0 | 70 | buccal muco    | 1 | 1 | 1  | 1 | 1   | 0 | 0 | 0000/00/00  | 0 | 2 | 0 |

|   |       |   |                  |   |   |   |   |     |   |   |              |   |   |   |
|---|-------|---|------------------|---|---|---|---|-----|---|---|--------------|---|---|---|
| 1 | 42.56 | 1 | 54 ant tongue    | 1 | 1 | 1 | 1 | 1   | 0 | 0 | 0 0000/00/00 | 0 | 2 | 0 |
| 1 | 7.97  | 0 | 52 ant tongue    | 1 | 1 | 0 | 4 | 4   | 1 | 0 | 1 0000/00/00 | 0 | 2 | 1 |
| 1 | 5.41  | 0 | 80 lip           | 1 | 1 | 1 | 3 | 3   | 0 | 0 | 0 0000/00/00 | 0 | 2 | 0 |
| 1 | 42.39 | 1 | 62 alveolar ridg | 0 | 1 | 0 | 4 | 4   | 0 | 0 | 0 0000/00/00 | 0 | 2 | 0 |
| 1 | 43.08 | 1 | 54 ant tongue    | 1 | 1 | 1 | 1 | 1 x | x |   | 0 0000/00/00 | 0 | 1 |   |
| 1 | 44.16 | 1 | 43 ant tongue    | 1 | 1 | 0 | 1 | 1   | 0 | 0 | 0 0000/00/00 | 0 | 1 | 0 |
| 1 | 42.39 | 1 | 51 ant tongue    | 1 | 1 | 1 | 3 | 3   | 0 | 0 | 0 0000/00/00 | 0 | 2 | 0 |
| 1 | 42.75 | 1 | 60 buccal muco   | 1 | 1 | 1 | 2 | 2   | 0 | 0 | 0 0000/00/00 | 0 | 2 | 0 |
| 1 | 42.75 | 1 | 59 buccal muco   | 1 | 1 | 0 | 1 | 1   | 0 | 0 | 0 0000/00/00 | 0 | 2 | 0 |
| 1 | 41.77 | 1 | 85 lip           | 1 | 0 | 0 | 1 | 1 x | x |   | 0 0000/00/00 | 0 | 1 |   |
| 1 | 42.72 | 1 | 36 alveolar ridg | 1 | 1 | 1 | 4 | 4   | 0 | 0 | 0 0000/00/00 | 0 | 1 | 0 |
| 1 | 54.00 | 1 | 56 buccal muco   | 1 | 1 | 1 | 2 | 2   | 0 | 0 | 1 0000/00/00 | 0 | 1 | 0 |
| 1 | 54.00 | 1 | 56 lip           | 1 | 1 | 1 | 1 | 1   | 0 | 0 | 0 0000/00/00 | 0 | 1 | 0 |
| 1 | 42.95 | 1 | 60 ant tongue    | 1 | 1 | 1 | 1 | 1 x | x |   | 0 0000/00/00 | 0 | 2 |   |
| 1 | 42.07 | 1 | 55 lip           | 1 | 1 | 0 | 1 | 1   | 0 | 0 | 0 0000/00/00 | 0 | 2 | 0 |
| 1 | 42.10 | 1 | 61 alveolar ridg | 1 | 1 | 1 | 4 | 4   | 0 | 0 | 0 0000/00/00 | 0 | 2 | 0 |
| 1 | 42.33 | 1 | 54 mouth floor   | 1 | 1 | 0 | 4 | 2   | 2 | 1 | 0 0000/00/00 | 0 | 2 | 1 |
| 1 | 42.10 | 1 | 72 ant tongue    | 1 | 1 | 1 | 1 | 1 x | x |   | 0 0000/00/00 | 0 | 2 |   |
| 1 | 42.10 | 1 | 57 rmt           | 1 | 1 | 1 | 4 | 4   | 0 | 0 | 0 0000/00/00 | 0 | 1 | 0 |
| 1 | 42.13 | 1 | 67 buccal muco   | 1 | 0 | 0 | 1 | 1 x | x |   | 1 2016/4/2   | 1 | 2 |   |
| 1 | 41.93 | 1 | 41 lip           | 1 | 1 | 1 | 1 | 1   | 0 | 0 | 0 0000/00/00 | 0 | 2 | 0 |
| 1 | 42.56 | 1 | 56 alveolar ridg | 1 | 1 | 1 | 1 | 1 x | x |   | 0 0000/00/00 | 0 | 2 |   |
| 1 | 14.16 | 0 | 57 ant tongue    | 1 | 1 | 1 | 4 | 4   | 2 | 0 | 0 2016/7/27  | 1 | 2 | 1 |
| 1 | 41.87 | 1 | 55 lip           | 1 | 1 | 0 | 1 | 1   | 0 | 0 | 0 0000/00/00 | 0 | 1 | 0 |
| 1 | 5.77  | 0 | 60 buccal muco   | 1 | 1 | 1 | 3 | 3   | 0 | 0 | 0 0000/00/00 | 0 | 1 | 0 |
| 1 | 41.70 | 1 | 62 alveolar ridg | 1 | 1 | 1 | 1 | 1   | 0 | 0 | 0 0000/00/00 | 0 | 2 | 0 |
| 1 | 41.80 | 1 | 63 ant tongue    | 1 | 1 | 1 | 4 | 4   | 0 | 0 | 0 0000/00/00 | 0 | 2 | 0 |
| 1 | 41.67 | 1 | 53 alveolar ridg | 1 | 1 | 1 | 4 | 4   | 0 | 0 | 0 0000/00/00 | 0 | 2 | 0 |
| 1 | 18.66 | 0 | 54 buccal muco   | 1 | 0 | 1 | 3 | 2   | 1 | 1 | 0 2016/7/25  | 1 | 2 | 1 |
| 1 | 9.70  | 0 | 56 alveolar ridg | 1 | 1 | 1 | 4 | 4   | 2 | 1 | 0 0000/00/00 | 0 | 2 | 1 |
| 1 | 21.80 | 0 | 67 lip           | 1 | 1 | 1 | 1 | 1   | 0 | 0 | 0 0000/00/00 | 0 | 2 | 0 |
| 1 | 41.64 | 1 | 56 ant tongue    | 1 | 1 | 1 | 1 | 1   | 0 | 0 | 0 0000/00/00 | 0 | 2 | 0 |
| 1 | 9.93  | 0 | 60 ant tongue    | 1 | 1 | 1 | 4 | 4   | 2 | 1 | 0 2016/5/13  | 1 | 2 | 1 |
| 1 | 41.48 | 1 | 49 ant tongue    | 0 | 0 | 0 | 1 | 1 x | x |   | 0 0000/00/00 | 0 | 1 |   |
| 1 | 41.41 | 1 | 54 buccal muco   | 1 | 1 | 1 | 1 | 1 x | x |   | 0 0000/00/00 | 0 | 2 |   |
| 1 | 24.33 | 0 | 43 buccal muco   | 1 | 1 | 0 | 4 | 4   | 2 | 1 | 0 2017/9/6   | 1 | 2 | 1 |
| 1 | 41.44 | 1 | 63 buccal muco   | 1 | 1 | 1 | 1 | 1 x | x |   | 0 0000/00/00 | 0 | 2 |   |
| 1 | 41.44 | 1 | 64 buccal muco   | 1 | 1 | 1 | 1 | 1   | 0 | 0 | 0 0000/00/00 | 0 | 1 | 0 |
| 1 | 41.38 | 1 | 44 mouth floor   | 1 | 1 | 1 | 1 | 1   | 0 | 0 | 0 0000/00/00 | 0 | 2 | 0 |
| 1 | 14.56 | 0 | 62 alveolar ridg | 1 | 1 | 0 | 1 | 1 x | x |   | 0 2014/12/9  | 1 | 1 |   |
| 1 | 13.41 | 0 | 62 ant tongue    | 1 | 1 | 0 | 1 | 1 x | x |   | 0 0000/00/00 | 0 | 2 |   |
| 1 | 41.08 | 1 | 64 buccal muco   | 1 | 1 | 1 | 2 | 2   | 0 | 0 | 0 0000/00/00 | 0 | 2 | 0 |
| 1 | 10.62 | 0 | 43 alveolar ridg | 1 | 1 | 1 | 4 | 4   | 0 | 0 | 1 0000/00/00 | 0 | 2 | 0 |
| 1 | 2.59  | 0 | 56 ant tongue    | 1 | 1 | 1 | 4 | 4   | 2 | 1 | 0 0000/00/00 | 0 | 2 | 1 |
| 1 | 41.44 | 1 | 64 buccal muco   | 0 | 0 | 0 | 3 | 1   | 1 | 0 | 0 0000/00/00 | 0 | 1 | 1 |
| 1 | 41.02 | 1 | 48 alveolar ridg | 1 | 1 | 1 | 4 | 4   | 0 | 0 | 0 0000/00/00 | 0 | 2 | 0 |
| 1 | 39.48 | 0 | 45 rmt           | 1 | 1 | 1 | 2 | 2   | 0 | 0 | 0 0000/00/00 | 0 | 2 | 0 |
| 1 | 29.02 | 0 | 81 ant tongue    | 1 | 1 | 0 | 2 | 2 x | x |   | 0 0000/00/00 | 0 | 2 |   |
| 1 | 40.43 | 1 | 57 buccal muco   | 1 | 1 | 1 | 3 | 3   | 0 | 0 | 0 0000/00/00 | 0 | 2 | 0 |
| 1 | 15.70 | 0 | 62 rmt           | 1 | 1 | 1 | 1 | 1 x | x |   | 0 0000/00/00 | 0 | 2 |   |
| 1 | 13.05 | 0 | 48 buccal muco   | 1 | 1 | 1 | 1 | 1 x | x |   | 0 0000/00/00 | 0 | 2 |   |
| 1 | 41.18 | 1 | 54 lip           | 1 | 1 | 1 | 1 | 1   | 0 | 0 | 0 0000/00/00 | 0 | 1 | 0 |
| 1 | 41.21 | 1 | 63 lip           | 0 | 0 | 1 | 1 | 1   | 0 | 0 | 0 0000/00/00 | 0 | 2 | 0 |
| 1 | 40.95 | 1 | 63 alveolar ridg | 1 | 1 | 1 | 4 | 4   | 2 | 0 | 0 0000/00/00 | 0 | 2 | 1 |
| 1 | 32.72 | 0 | 57 rmt           | 1 | 1 | 0 | 2 | 2 x | x |   | 0 0000/00/00 | 0 | 2 |   |
| 1 | 41.08 | 1 | 66 buccal muco   | 1 | 1 | 1 | 2 | 2   | 0 | 0 | 0 0000/00/00 | 0 | 2 | 0 |
| 1 | 40.43 | 1 | 63 rmt           | 0 | 0 | 1 | 1 | 1   | 0 | 0 | 0 0000/00/00 | 0 | 2 | 0 |
| 1 | 8.39  | 0 | 45 mouth floor   | 1 | 1 | 1 | 4 | 3   | 2 | 1 | 0 0000/00/00 | 0 | 2 | 1 |
| 1 | 40.39 | 1 | 71 buccal muco   | 1 | 1 | 1 | 1 | 1   | 0 | 0 | 0 2016/4/20  | 1 | 3 | 0 |
| 1 | 41.34 | 1 | 63 buccal muco   | 0 | 0 | 0 | 2 | 2 x | x |   | 0 0000/00/00 | 0 | 1 |   |
| 1 | 40.46 | 1 | 66 alveolar ridg | 1 | 1 | 1 | 2 | 2   | 0 | 0 | 0 0000/00/00 | 0 | 2 | 0 |
| 1 | 40.26 | 1 | 55 buccal muco   | 1 | 0 | 0 | 2 | 2   | 0 | 0 | 0 0000/00/00 | 0 | 2 | 0 |
| 1 | 13.41 | 0 | 56 rmt           | 1 | 1 | 1 | 4 | 4   | 0 | 0 | 0 0000/00/00 | 0 | 1 | 0 |
| 1 | 40.23 | 1 | 42 buccal muco   | 1 | 1 | 1 | 4 | 4   | 1 | 0 | 0 0000/00/00 | 0 | 2 | 1 |
| 1 | 41.21 | 1 | 52 buccal muco   | 1 | 0 | 0 | 1 | 1 x | x |   | 0 2016/8/17  | 1 | 2 |   |
| 1 | 40.30 | 1 | 65 buccal muco   | 1 | 1 | 1 | 1 | 1   | 0 | 0 | 0 0000/00/00 | 0 | 3 | 0 |
| 1 | 40.56 | 1 | 44 buccal muco   | 1 | 1 | 0 | 2 | 2   | 0 | 0 | 0 0000/00/00 | 0 | 2 | 0 |
| 1 | 39.90 | 1 | 38 ant tongue    | 1 | 1 | 1 | 4 | 4   | 2 | 1 | 0 0000/00/00 | 0 | 2 | 1 |
| 1 | 39.87 | 1 | 68 lip           | 1 | 1 | 1 | 4 | 1   | 2 | 1 | 0 0000/00/00 | 0 | 2 | 1 |
| 1 | 39.87 | 1 | 87 ant tongue    | 0 | 0 | 0 | 2 | 2 x | x |   | 0 0000/00/00 | 0 | 2 |   |
| 1 | 12.46 | 0 | 85 rmt           | 1 | 1 | 1 | 4 | 4   | 2 | 1 | 0 0000/00/00 | 0 | 2 | 1 |
| 1 | 39.74 | 1 | 57 alveolar ridg | 1 | 1 | 0 | 1 | 1   | 0 | 0 | 0 0000/00/00 | 0 | 2 | 0 |



|   |       |   |    |                |   |   |    |   |   |   |                |   |   |   |
|---|-------|---|----|----------------|---|---|----|---|---|---|----------------|---|---|---|
| 1 | 39.48 | 1 | 54 | hard palate    | 1 | 1 | 2  | 2 | 0 | 0 | 0 0000/00/00   | 0 | 2 | 0 |
| 1 | 39.84 | 1 | 68 | buccal muco    | 1 | 1 | 0  | 2 | 2 | x | 0 0000/00/00   | 0 | 3 |   |
| 1 | 39.38 | 1 | 71 | rmt            | 1 | 1 | 1  | 1 | 1 | x | 0 0000/00/00   | 0 | 1 |   |
| 1 | 62.95 | 1 | 65 | hard palate    | 1 | 1 | 4  | 4 | 0 | 0 | 0 2016/1/29    | 1 | 1 | 0 |
| 1 | 39.54 | 1 | 55 | alveolar ridge | 1 | 1 | 1  | 4 | 4 | 1 | 0 0000/00/00   | 0 | 2 | 1 |
| 1 | 39.38 | 1 | 41 | ant tongue     | 1 | 0 | 1  | 2 | 2 | 0 | 0 0000/00/00   | 0 | 2 | 0 |
| 1 | 4.62  | 0 | 66 | buccal muco    | 1 | 1 | 0  | 4 | 4 | 2 | 0 2016/6/7     | 1 | 2 | 1 |
| 1 | 39.84 | 1 | 76 | alveolar ridge | 1 | 1 | 1  | 4 | 4 | x | 0 0000/00/00   | 0 | 2 |   |
| 1 | 39.08 | 1 | 40 | buccal muco    | 1 | 1 | 2  | 2 | 0 | 0 | 0 0000/00/00   | 0 | 2 | 0 |
| 1 | 39.18 | 1 | 60 | ant tongue     | 1 | 1 | 1  | 1 | 1 | 0 | 0 0000/00/00   | 0 | 2 | 0 |
| 1 | 6.52  | 0 | 57 | ant tongue     | 1 | 1 | 1  | 4 | 4 | 2 | 1 0 2016/8/10  | 1 | 2 | 1 |
| 1 | 39.80 | 1 | 60 | ant tongue     | 1 | 1 | 1  | 1 | 1 | 0 | 0 0000/00/00   | 0 | 1 | 0 |
| 1 | 39.28 | 1 | 79 | buccal muco    | 1 | 1 | 1  | 2 | 2 | 0 | 0 0000/00/00   | 0 | 2 | 0 |
| 1 | 39.34 | 1 | 55 | buccal muco    | 1 | 1 | 1  | 1 | 1 | x | 0 0000/00/00   | 0 | 2 |   |
| 1 | 14.95 | 0 | 41 | ant tongue     | 1 | 1 | 1  | 4 | 4 | 0 | 0 0000/00/00   | 0 | 2 | 0 |
| 1 | 40.33 | 1 | 63 | alveolar ridge | 1 | 1 | 3  | 3 | 0 | 0 | 0 0000/00/00   | 0 | 2 | 0 |
| 1 | 38.92 | 1 | 62 | ant tongue     | 1 | 1 | 1  | 1 | 1 | 0 | 0 0000/00/00   | 0 | 2 | 0 |
| 1 | 30.07 | 0 | 58 | buccal muco    | 1 | 1 | 1  | 1 | 1 | x | 0 0000/00/00   | 0 | 2 |   |
| 1 | 39.38 | 1 | 62 | alveolar ridge | 1 | 1 | 1  | 4 | 4 | 0 | 0 0000/00/00   | 0 | 1 | 0 |
| 1 | 38.92 | 1 | 34 | ant tongue     | 1 | 1 | 1  | 3 | 2 | 1 | 0 0000/00/00   | 0 | 2 | 1 |
| 1 | 38.85 | 1 | 68 | buccal muco    | 0 | 0 | 0  | 1 | 1 | 0 | 0 0000/00/00   | 0 | 2 | 0 |
| 1 | 1.31  | 0 | 53 | buccal muco    | 1 | 1 | 1  | 2 | 2 | 0 | 0 0000/00/00   | 0 | 2 | 0 |
| 1 | 10.03 | 0 | 45 | buccal muco    | 1 | 1 | 1  | 3 | 3 | 0 | 0 0000/00/00   | 0 | 2 | 0 |
| 1 | 38.66 | 1 | 54 | ant tongue     | 1 | 1 | 1  | 1 | 1 | x | 0 0000/00/00   | 0 | 2 |   |
| 1 | 38.49 | 1 | 73 | buccal muco    | 1 | 1 | 1  | 2 | 2 | 0 | 0 0000/00/00   | 0 | 2 | 0 |
| 1 | 39.38 | 1 | 46 | buccal muco    | 1 | 1 | 1  | 1 | 1 | x | 0 2016/7/25    | 1 | 1 |   |
| 1 | 38.59 | 1 | 65 | buccal muco    | 1 | 0 | 4  | 4 | 0 | 0 | 0 0000/00/00   | 0 | 2 | 0 |
| 1 | 38.59 | 1 | 52 | ant tongue     | 1 | 1 | 1  | 4 | 4 | 0 | 0 0000/00/00   | 0 | 1 | 0 |
| 1 | 15.87 | 0 | 78 | hard palate    | 1 | 1 | 1  | 2 | 2 | 0 | 0 2016/11/15   | 1 | 2 | 0 |
| 1 | 39.15 | 1 | 49 | lip            | 1 | 0 | 1  | 1 | 1 | x | 0 0000/00/00   | 0 | 1 |   |
| 1 | 38.79 | 1 | 79 | buccal muco    | 1 | 1 | 0  | 4 | 2 | 2 | 0 0000/00/00   | 0 | 2 | 1 |
| 1 | 17.31 | 0 | 73 | alveolar ridge | 1 | 1 | 0  | 1 | 1 | x | 1 0000/00/00   | 0 | 2 |   |
| 1 | 38.33 | 1 | 53 | ant tongue     | 1 | 1 | 1  | 2 | 2 | 0 | 0 0000/00/00   | 0 | 2 | 0 |
| 1 | 38.36 | 1 | 56 | buccal muco    | 1 | 1 | 1  | 1 | 1 | x | 0 0000/00/00   | 0 | 2 |   |
| 1 | 38.66 | 1 | 56 | buccal muco    | 1 | 0 | 0  | 1 | 1 | 0 | 0 2016/6/10    | 1 | 2 | 0 |
| 1 | 24.85 | 0 | 53 | buccal muco    | 1 | 1 | 1  | 1 | 1 | x | 0 0000/00/00   | 0 | 2 |   |
| 1 | 38.16 | 1 | 52 | ant tongue     | 1 | 0 | 1  | 3 | 2 | 1 | 0 0000/00/00   | 0 | 2 | 1 |
| 1 | 38.23 | 1 | 34 | ant tongue     | 1 | 1 | 1  | 4 | 4 | 2 | 0 0000/00/00   | 0 | 2 | 1 |
| 1 | 38.23 | 1 | 34 | alveolar ridge | 1 | 1 | 0  | 1 | 1 | 0 | 0 0000/00/00   | 0 | 2 | 0 |
| 1 | 6.69  | 0 | 66 | rmt            | 1 | 1 | 1  | 4 | 4 | x | 0 2016/9/3     | 1 | 2 |   |
| 1 | 38.26 | 1 | 52 | ant tongue     | 1 | 0 | 0  | 2 | 2 | 0 | 0 0000/00/00   | 0 | 3 | 0 |
| 1 | 29.08 | 0 | 67 | alveolar ridge | 1 | 1 | 1  | 4 | 4 | 0 | 0 0000/00/00   | 0 | 1 | 0 |
| 1 | 38.10 | 1 | 81 | ant tongue     | 0 | 0 | 1  | 1 | 1 | x | 0 0000/00/00   | 0 | 2 |   |
| 1 | 37.90 | 1 | 66 | buccal muco    | 1 | 1 | 1  | 1 | 1 | 0 | 0 0000/00/00   | 0 | 2 | 0 |
| 1 | 22.82 | 0 | 58 | ant tongue     | 1 | 1 | 1  | 4 | 4 | 1 | 1 2016/6/7     | 1 | 3 | 1 |
| 1 | 38.16 | 1 | 57 | lip            | 1 | 1 | 1  | 1 | 1 | x | 0 0000/00/00   | 0 | 1 |   |
| 1 | 38.20 | 1 | 44 | buccal muco    | 1 | 1 | 1  | 1 | 1 | 0 | 0 0000/00/00   | 0 | 2 | 0 |
| 1 | 38.23 | 1 | 50 | alveolar ridge | 1 | 1 | 0  | 1 | 1 | x | 0 2018/5/23    | 1 | 2 |   |
| 1 | 2.20  | 0 | 53 | buccal muco    | 1 | 1 | 1  | 1 | 1 | 0 | 0 0000/00/00   | 0 | 2 | 0 |
| 1 | 37.67 | 1 | 59 | buccal muco    | 1 | 1 | 0  | 2 | 2 | 0 | 0 0000/00/00   | 0 | 2 | 0 |
| 1 | 37.64 | 1 | 63 | ant tongue     | 0 | 0 | 1  | 2 | 2 | 0 | 0 0000/00/00   | 0 | 1 | 0 |
| 1 | 37.54 | 1 | 81 | lip            | 1 | 1 | 1  | 1 | 1 | 0 | 0 0000/00/00   | 0 | 1 | 0 |
| 1 | 14.23 | 0 | 59 | ant tongue     | 1 | 1 | 0  | 1 | 1 | x | 0 2016/9/20    | 1 | 2 |   |
| 1 | 7.41  | 0 | 59 | mouth floor    | 1 | 1 | 4  | 1 | 2 | 1 | 0 0000/00/00   | 0 | 2 | 1 |
| 1 | 20.59 | 0 | 60 | alveolar ridge | 1 | 1 | 4  | 4 | x | x | 0 2016/12/28   | 1 | 2 |   |
| 1 | 37.90 | 1 | 61 | ant tongue     | 1 | 1 | 1  | 4 | 2 | 2 | 1 0 0000/00/00 | 0 | 2 | 1 |
| 1 | 37.54 | 1 | 71 | alveolar ridge | 0 | 0 | 1  | 1 | 1 | x | 0 0000/00/00   | 0 | 2 |   |
| 1 | 11.93 | 0 | 83 | buccal muco    | 1 | 1 | 無法 | 1 | 1 | x | 0 0000/00/00   | 0 | 2 |   |
| 1 | 37.44 | 1 | 40 | ant tongue     | 1 | 0 | 0  | 1 | 1 | 0 | 0 0000/00/00   | 0 | 2 | 0 |
| 1 | 9.61  | 0 | 64 | buccal muco    | 1 | 0 | 1  | 1 | 1 | x | 0 2016/8/31    | 1 | 2 |   |
| 1 | 37.44 | 1 | 57 | ant tongue     | 1 | 1 | 1  | 2 | 2 | 0 | 0 0000/00/00   | 0 | 2 | 0 |
| 1 | 37.28 | 1 | 66 | lip            | 1 | 1 | 0  | 1 | 1 | x | 0 0000/00/00   | 0 | 2 |   |
| 1 | 33.70 | 0 | 44 | rmt            | 1 | 0 | 4  | 1 | 2 | 1 | 0 2017/5/4     | 1 | 3 | 1 |
| 1 | 38.00 | 1 | 55 | alveolar ridge | 1 | 1 | 1  | 2 | 2 | x | 0 0000/00/00   | 0 | 3 |   |
| 1 | 37.70 | 1 | 57 | buccal muco    | 1 | 1 | 1  | 1 | 1 | x | 1 0000/00/00   | 0 | 2 |   |
| 1 | 37.11 | 1 | 50 | buccal muco    | 1 | 1 | 0  | 2 | 2 | 0 | 0 0000/00/00   | 0 | 1 | 0 |
| 1 | 37.44 | 1 | 37 | ant tongue     | 0 | 0 | 0  | 1 | 1 | 0 | 0 0000/00/00   | 0 | 2 | 0 |
| 1 | 37.44 | 1 | 79 | alveolar ridge | 0 | 0 | 0  | 4 | 4 | 1 | 0 0000/00/00   | 0 | 2 | 1 |
| 1 | 37.08 | 1 | 59 | buccal muco    | 1 | 0 | 0  | 1 | 1 | x | 0 0000/00/00   | 0 | 1 |   |
| 1 | 31.38 | 0 | 85 | ant tongue     | 0 | 0 | 0  | 1 | 1 | x | 0 2016/8/31    | 1 | 3 |   |
| 1 | 18.30 | 0 | 41 | rmt            | 1 | 1 | 1  | 4 | 4 | 0 | 0 2016/11/11   | 1 | 2 | 0 |
| 1 | 37.05 | 1 | 51 | buccal muco    | 1 | 1 | 1  | 3 | 3 | 0 | 0 0000/00/00   | 0 | 2 | 0 |

|   |       |   |    |                |   |   |   |   |   |   |   |   |            |   |   |   |
|---|-------|---|----|----------------|---|---|---|---|---|---|---|---|------------|---|---|---|
| 1 | 37.90 | 1 | 64 | buccal muco    | 1 | 1 | 1 | 1 | 1 | 0 | 0 | 0 | 0000/00/00 | 0 | 1 | 0 |
| 1 | 36.95 | 1 | 63 | alveolar ridge | 1 | 1 | 1 | 4 | 4 | x | x | 0 | 0000/00/00 | 0 | 2 |   |
| 1 | 36.98 | 1 | 63 | buccal muco    | 1 | 1 | 0 | 1 | 1 | 0 | 0 | 0 | 0000/00/00 | 0 | 2 | 0 |
| 1 | 37.51 | 1 | 42 | lip            | 1 | 1 | 1 | 2 | 2 | 0 | 0 | 0 | 0000/00/00 | 0 | 1 | 0 |
| 1 | 36.03 | 0 | 63 | lip            | 1 | 1 |   | 2 | 2 | x | x | 0 | 0000/00/00 | 0 | 1 |   |
| 1 | 37.44 | 1 | 45 | buccal muco    | 1 | 1 | 1 | 1 | 1 | 0 | 0 | 0 | 0000/00/00 | 0 | 2 | 0 |
| 1 | 14.13 | 0 | 70 | buccal muco    | 1 | 1 | 0 | 4 | 1 | 2 | 0 | 0 | 0000/00/00 | 0 | 2 | 1 |
| 1 | 37.08 | 1 | 66 | alveolar ridge | 1 | 1 | 1 | 3 | 3 | 0 | 0 | 0 | 0000/00/00 | 0 | 1 | 0 |
| 1 | 35.51 | 0 | 59 | buccal muco    | 1 | 1 | 1 | 1 | 1 | x | x | 0 | 0000/00/00 | 0 | 3 |   |
| 1 | 35.51 | 0 | 59 | lip            | 1 | 1 | 1 | 1 | 1 | x | x | 0 | 0000/00/00 | 0 | 2 |   |
| 1 | 17.21 | 0 | 72 | alveolar ridge | 1 | 1 | 1 | 4 | 4 | x | x | 0 | 2015/4/24  | 1 | 2 |   |
| 1 | 36.72 | 1 | 49 | buccal muco    | 1 | 1 | 1 | 4 | 4 | 0 | 0 | 0 | 0000/00/00 | 0 | 2 | 0 |
| 1 | 16.82 | 0 | 59 | buccal muco    | 1 | 1 | 1 | 2 | 2 | 0 | 0 | 0 | 2017/5/15  | 1 | 2 | 0 |
| 1 | 36.52 | 1 | 48 | alveolar ridge | 1 | 1 | 1 | 4 | 4 | 1 | 0 | 0 | 0000/00/00 | 0 | 2 | 1 |
| 1 | 3.38  | 0 | 56 | ant tongue     | 1 | 1 | 1 | 4 | 4 | 1 | 0 | 0 | 0000/00/00 | 0 | 2 | 1 |
| 1 | 36.59 | 1 | 47 | buccal muco    | 1 | 1 |   | 4 | 4 | 0 | 0 | 0 | 0000/00/00 | 0 | 2 | 0 |
| 1 | 36.43 | 1 | 44 | lip            | 1 | 1 | 1 | 1 | 1 | x | x | 0 | 2016/7/5   | 1 | 3 |   |
| 1 | 32.43 | 0 | 56 | ant tongue     | 1 | 0 | 0 | 1 | 1 | 0 | 0 | 0 | 2017/5/31  | 1 | 2 | 0 |
| 1 | 36.56 | 0 | 53 | buccal muco    | 1 | 0 | 1 | 2 | 2 | 0 | 0 | 0 | 0000/00/00 | 0 | 2 | 0 |
| 1 | 36.49 | 1 | 72 | ant tongue     | 1 | 1 |   | 1 | 1 | 0 | 0 | 0 | 0000/00/00 | 0 | 2 | 0 |
| 1 | 36.75 | 1 | 53 | lip            | 1 | 1 | 0 | 1 | 1 | 0 | 0 | 0 | 0000/00/00 | 0 | 1 | 0 |
| 1 | 3.18  | 0 | 67 | alveolar ridge | 1 | 1 | 0 | 4 | 4 | 2 | 1 | 0 | 0000/00/00 | 0 | 2 | 1 |
| 1 | 36.43 | 1 | 65 | ant tongue     | 1 | 1 | 1 | 4 | 2 | 2 | 0 | 0 | 0000/00/00 | 0 | 3 | 1 |
| 1 | 36.16 | 1 | 57 | buccal muco    | 1 | 1 | 1 | 1 | 1 | x | x | 0 | 0000/00/00 | 0 | 1 |   |
| 1 | 36.10 | 1 | 77 | alveolar ridge | 1 | 1 | 1 | 4 | 4 | 0 | 0 | 0 | 0000/00/00 | 0 | 2 | 0 |
| 1 | 25.93 | 0 | 74 | alveolar ridge | 1 | 1 | 1 | 2 | 2 | 0 | 0 | 0 | 2018/3/9   | 1 | 1 | 0 |
| 1 | 16.46 | 0 | 52 | ant tongue     | 1 | 1 | 1 | 4 | 4 | x | x | 1 | 2016/6/7   | 1 | 3 |   |
| 1 | 37.08 | 1 | 49 | buccal muco    | 1 | 1 | 1 | 3 | 3 | 0 | 0 | 0 | 0000/00/00 | 0 | 3 | 0 |
| 1 | 36.07 | 1 | 65 | ant tongue     | 1 | 1 | 0 | 4 | 4 | 0 | 0 | 0 | 0000/00/00 | 0 | 1 | 0 |
| 1 | 0.36  | 0 | 68 | buccal muco    | 1 | 1 | 1 | 1 | 1 | 0 | 0 | 0 | 0000/00/00 | 0 | 1 | 0 |
| 1 | 36.03 | 1 | 43 | buccal muco    | 1 | 1 | 1 | 1 | 1 | 0 | 0 | 0 | 0000/00/00 | 0 | 2 | 0 |
| 1 | 36.07 | 1 | 56 | mouth floor    | 1 | 0 | 1 | 4 | 4 | 2 | 1 | 0 | 0000/00/00 | 0 | 2 | 1 |
| 1 | 12.72 | 0 | 58 | hard palate    | 1 | 1 | 1 | 4 | 2 | 2 | 0 | 0 | 0000/00/00 | 0 | 2 | 1 |
| 1 | 17.51 | 0 | 75 | buccal muco    | 1 | 1 | 0 | 1 | 1 | x | x | 0 | 0000/00/00 | 0 | 2 |   |
| 1 | 36.66 | 1 | 37 | buccal muco    | 1 | 1 |   | 1 | 1 | 0 | 0 | 0 | 0000/00/00 | 0 | 2 | 0 |
| 1 | 35.84 | 1 | 57 | buccal muco    | 1 | 1 | 1 | 3 | 1 | 1 | 0 | 0 | 0000/00/00 | 0 | 2 | 1 |
| 1 | 35.74 | 1 | 52 | buccal muco    | 1 | 1 | 0 | 2 | 2 | x | x | 0 | 0000/00/00 | 0 | 2 |   |
| 1 | 32.46 | 0 | 45 | rmt            | 1 | 1 | 1 | 4 | 4 | 2 | 1 | 0 | 0000/00/00 | 0 | 2 | 1 |
| 1 | 45.77 | 1 | 72 | buccal muco    | 1 | 1 | 1 | 1 | 1 | x | x | 0 | 0000/00/00 | 0 | 2 |   |
| 1 | 25.70 | 0 | 42 | buccal muco    | 1 | 0 | 0 | 1 | 1 | 0 | 0 | 0 | 0000/00/00 | 0 | 2 | 0 |
| 1 | 14.62 | 0 | 54 | lip            | 1 | 0 | 1 | 1 | 1 | x | x | 0 | 0000/00/00 | 0 | 2 |   |
| 1 | 35.57 | 1 | 43 | ant tongue     | 1 | 1 | 1 | 2 | 2 | 0 | 0 | 0 | 0000/00/00 | 0 | 2 | 0 |
| 1 | 35.61 | 1 | 52 | buccal muco    | 1 | 1 | 0 | 4 | 4 | 0 | 0 | 0 | 2016/12/20 | 1 | 1 | 0 |
| 1 | 35.44 | 1 | 76 | buccal muco    | 1 | 1 |   | 3 | 3 | 1 | 0 | 0 | 0000/00/00 | 0 | 2 | 1 |
| 1 | 35.38 | 1 | 69 | lip            | 1 | 1 | 1 | 1 | 1 | x | x | 0 | 0000/00/00 | 0 | 1 |   |
| 1 | 32.52 | 0 | 54 | buccal muco    | 1 | 1 | 1 | 4 | 4 | 0 | 0 | 0 | 0000/00/00 | 0 | 2 | 0 |
| 1 | 12.39 | 0 | 44 | rmt            | 1 | 1 |   | 4 | 1 | 2 | 1 | 0 | 2016/10/27 | 1 | 2 | 1 |
| 1 | 21.97 | 0 | 62 | buccal muco    | 1 | 1 | 0 | 1 | 1 | x | x | 1 | 0000/00/00 | 0 | 2 |   |
| 1 | 2.95  | 0 | 57 | buccal muco    | 1 | 1 | 1 | 4 | 3 | 2 | 1 | 0 | 2016/9/6   | 1 | 3 | 1 |
| 1 | 35.18 | 1 | 47 | ant tongue     | 1 | 1 | 1 | 2 | 2 | 0 | 0 | 0 | 0000/00/00 | 0 | 2 | 0 |
| 1 | 34.92 | 1 | 57 | alveolar ridge | 1 | 1 | 1 | 1 | 1 | 0 | 0 | 0 | 0000/00/00 | 0 | 2 | 0 |
| 1 | 34.82 | 1 | 48 | ant tongue     | 1 | 1 | 1 | 4 | 1 | 2 | 1 | 0 | 0000/00/00 | 0 | 2 | 1 |
| 1 | 35.28 | 1 | 39 | buccal muco    | 1 | 1 |   | 4 | 4 | 0 | 0 | 0 | 0000/00/00 | 0 | 1 | 0 |
| 1 | 34.82 | 1 | 65 | alveolar ridge | 1 | 1 | 1 | 4 | 4 | 0 | 0 | 0 | 0000/00/00 | 0 | 2 | 0 |
| 1 | 34.98 | 1 | 72 | ant tongue     | 1 | 1 | 0 | 3 | 2 | 1 | 0 | 0 | 2016/10/26 | 1 | 2 | 1 |
| 1 | 35.05 | 1 | 53 | buccal muco    | 1 | 1 | 1 | 1 | 1 | 0 | 0 | 0 | 0000/00/00 | 0 | 2 | 0 |
| 1 | 34.82 | 1 | 74 | ant tongue     | 0 | 0 | 0 | 2 | 2 | 0 | 0 | 0 | 0000/00/00 | 0 | 3 | 0 |
| 1 | 58.82 | 1 | 61 | hard palate    | 1 | 1 | 1 | 3 | 3 | 0 | 0 | 0 | 0000/00/00 | 0 | 2 | 0 |
| 1 | 35.74 | 1 | 64 | buccal muco    | 1 | 0 | 1 | 1 | 1 | x | x | 0 | 0000/00/00 | 0 | 1 |   |
| 1 | 19.70 | 0 | 47 | rmt            | 1 | 1 | 1 | 1 | 1 | x | x | 0 | 2016/9/16  | 1 | 2 |   |
| 1 | 34.72 | 1 | 70 | alveolar ridge | 1 | 1 | 0 | 4 | 4 | 0 | 0 | 0 | 0000/00/00 | 0 | 2 | 0 |
| 1 | 27.87 | 0 | 65 | ant tongue     | 1 | 1 |   | 1 | 1 | 0 | 0 | 0 | 0000/00/00 | 0 | 2 | 0 |
| 1 | 12.13 | 0 | 83 | ant tongue     | 1 | 0 | 0 | 2 | 2 | 0 | 0 | 0 | 0000/00/00 | 0 | 2 | 0 |
| 1 | 34.69 | 1 | 59 | lip            | 1 | 1 | 0 | 2 | 2 | 0 | 0 | 0 | 0000/00/00 | 0 | 2 | 0 |
| 1 | 34.56 | 1 | 45 | ant tongue     | 1 | 1 | 1 | 1 | 1 | x | x | 0 | 0000/00/00 | 0 | 2 |   |
| 1 | 16.46 | 0 | 65 | alveolar ridge | 1 | 1 | 1 | 4 | 4 | 0 | 0 | 0 | 0000/00/00 | 0 | 3 | 0 |
| 1 | 36.36 | 1 | 62 | lip            | 1 | 0 | 1 | 1 | 1 | 0 | 0 | 0 | 0000/00/00 | 0 | 1 | 0 |
| 1 | 34.46 | 1 | 55 | ant tongue     | 1 | 1 | 1 | 1 | 1 | 0 | 0 | 0 | 0000/00/00 | 0 | 2 | 0 |
| 1 | 34.30 | 1 | 55 | alveolar ridge | 1 | 1 | 1 | 4 | 4 | 0 | 0 | 0 | 0000/00/00 | 0 | 2 | 0 |
| 1 | 36.20 | 1 | 58 | rmt            | 1 | 1 | 1 | 4 | 4 | 0 | 0 | 0 | 0000/00/00 | 0 | 2 | 0 |
| 1 | 26.33 | 0 | 69 | buccal muco    | 1 | 0 |   | 3 | 1 | 1 | 0 | 0 | 0000/00/00 | 0 | 2 | 1 |
| 1 | 35.15 | 1 | 73 | buccal muco    | 1 | 1 | 1 | 1 | 1 | 0 | 0 | 0 | 0000/00/00 | 0 | 2 | 0 |





|   |       |   |                   |   |   |      |   |     |   |   |              |   |   |   |
|---|-------|---|-------------------|---|---|------|---|-----|---|---|--------------|---|---|---|
| 1 | 14.95 | 0 | 58 rmt            | 1 | 1 |      | 4 | 4   | 0 | 0 | 0 0000/00/00 | 0 | 2 | 0 |
| 1 | 25.08 | 0 | 72 ant tongue     | 1 | 1 |      | 1 | 1 x | x |   | 0 0000/00/00 | 0 | 1 |   |
| 1 | 28.52 | 1 | 59 buccal muco    | 1 | 0 | 0    | 4 | 2   | 2 | 1 | 0 0000/00/00 | 0 | 2 | 1 |
| 1 | 29.48 | 1 | 46 ant tongue     | 1 | 1 | 1    | 4 | 4   | 2 | 0 | 0 0000/00/00 | 0 | 2 | 1 |
| 1 | 28.85 | 1 | 64 ant tongue     | 1 | 1 | 1    | 3 | 1   | 1 | 0 | 0 0000/00/00 | 0 | 2 | 1 |
| 1 | 29.25 | 1 | 67 buccal muco    | 1 | 1 | 0    | 4 | 4   | 0 | 0 | 0 0000/00/00 | 0 | 2 | 0 |
| 1 | 28.89 | 1 | 56 alveolar ridge | 1 | 0 | 0    | 4 | 4   | 0 | 0 | 0 0000/00/00 | 0 | 2 | 0 |
| 1 | 18.16 | 0 | 47 ant tongue     | 1 | 1 | 0    | 1 | 1   | 0 | 0 | 0 2017/7/8   | 1 | 3 | 0 |
| 1 | 28.30 | 1 | 60 alveolar ridge | 1 | 1 | 1    | 4 | 4   | 0 | 0 | 0 0000/00/00 | 0 | 2 | 0 |
| 1 | 7.08  | 0 | 65 buccal muco    | 1 | 1 | 1    | 4 | 4   | 2 | 1 | 0 0000/00/00 | 0 | 2 | 1 |
| 1 | 28.23 | 1 | 68 buccal muco    | 1 | 1 | 1    | 1 | 1 x | x |   | 0 0000/00/00 | 0 | 1 |   |
| 1 | 28.10 | 1 | 80 buccal muco    | 1 | 1 | 1    | 1 | 1 x | x |   | 0 0000/00/00 | 0 | 3 |   |
| 1 | 28.13 | 1 | 37 buccal muco    | 1 | 1 | 1    | 4 | 1   | 2 | 1 | 0 0000/00/00 | 0 | 2 | 1 |
| 1 | 27.84 | 1 | 84 ant tongue     | 1 | 1 | 0    | 2 | 2   | 0 | 0 | 0 0000/00/00 | 0 | 3 | 0 |
| 1 | 27.87 | 1 | 52 buccal muco    | 1 | 1 | 1    | 4 | 4   | 0 | 0 | 0 0000/00/00 | 0 | 2 | 0 |
| 1 | 27.80 | 1 | 45 ant tongue     | 1 | 1 | 1    | 4 | 4   | 0 | 0 | 0 0000/00/00 | 0 | 2 | 0 |
| 1 | 61.05 | 1 | 61 rmt            | 1 | 1 | 0 無法 |   | 1 x | x |   | 0 0000/00/00 | 0 | 1 |   |
| 1 | 27.67 | 1 | 67 ant tongue     | 1 | 1 | 1    | 4 | 2   | 2 | 1 | 0 0000/00/00 | 0 | 2 | 1 |
| 1 | 28.79 | 1 | 59 lip            | 1 | 1 | 1    | 3 | 3   | 0 | 0 | 0 0000/00/00 | 0 | 2 | 0 |
| 1 | 28.85 | 1 | 46 alveolar ridge | 1 | 1 | 1    | 4 | 4   | 2 | 1 | 0 0000/00/00 | 0 | 2 | 1 |
| 1 | 27.67 | 1 | 52 alveolar ridge | 1 | 1 | 1    | 1 | 1   | 0 | 0 | 0 0000/00/00 | 0 | 2 | 0 |
| 1 | 28.43 | 1 | 42 ant tongue     | 1 | 1 | 1    | 1 | 1   | 0 | 0 | 0 2017/10/17 | 1 | 2 | 0 |
| 1 | 28.79 | 1 | 68 buccal muco    | 1 | 0 | 1    | 2 | 2   | 0 | 0 | 0 0000/00/00 | 0 | 1 | 0 |
| 1 | 27.54 | 1 | 67 rmt            | 1 | 1 | 1    | 2 | 2   | 0 | 0 | 0 0000/00/00 | 0 | 2 | 0 |
| 1 | 27.67 | 1 | 44 buccal muco    | 1 | 1 | 1    | 1 | 1   | 0 | 0 | 0 0000/00/00 | 0 | 2 | 0 |
| 1 | 28.56 | 1 | 65 lip            | 1 | 1 | 1    | 3 | 2   | 1 | 0 | 0 0000/00/00 | 0 | 2 | 1 |
| 1 | 10.85 | 0 | 52 ant tongue     | 1 | 0 | 1    | 4 | 4   | 2 | 1 | 0 2017/8/2   | 1 | 2 | 1 |
| 1 | 27.48 | 1 | 56 ant tongue     | 1 | 1 | 1    | 3 | 1   | 1 | 0 | 0 0000/00/00 | 0 | 2 | 1 |
| 1 | 28.13 | 1 | 62 hard palate    | 1 | 1 |      | 1 | 1   | 0 | 0 | 0 0000/00/00 | 0 | 1 | 0 |
| 1 | 27.38 | 1 | 56 buccal muco    | 1 | 0 | 1    | 4 | 4   | 0 | 0 | 0 0000/00/00 | 0 | 2 | 0 |
| 1 | 27.57 | 1 | 61 lip            | 1 | 1 | 1    | 1 | 1   | 0 | 0 | 0 0000/00/00 | 0 | 1 | 0 |
| 1 | 27.18 | 1 | 57 alveolar ridge | 1 | 1 | 1    | 2 | 2   | 0 | 0 | 0 0000/00/00 | 0 | 2 | 0 |
| 1 | 8.92  | 0 | 75 alveolar ridge | 1 | 1 | 0    | 1 | 1 x | x |   | 0 2017/8/30  | 1 | 2 |   |
| 1 | 29.93 | 1 | 63 buccal muco    | 1 | 1 | 1    | 1 | 1   | 0 | 0 | 0 2017/12/20 | 1 | 2 | 0 |
| 1 | 27.15 | 1 | 60 hard palate    | 1 | 1 | 1    | 3 | 1   | 1 | 0 | 0 0000/00/00 | 0 | 2 | 1 |
| 1 | 27.44 | 1 | 56 alveolar ridge | 1 | 1 | 1    | 4 | 4   | 2 | 1 | 0 0000/00/00 | 0 | 2 | 1 |
| 1 | 27.11 | 1 | 46 lip            | 1 | 1 | 1    | 2 | 2 x | x |   | 0 0000/00/00 | 0 | 1 |   |
| 1 | 16.56 | 0 | 55 alveolar ridge | 1 | 1 | 1    | 4 | 4   | 2 | 1 | 0 2017/7/17  | 1 | 3 | 1 |
| 1 | 27.41 | 1 | 48 alveolar ridge | 1 | 1 | 1    | 4 | 4   | 0 | 0 | 0 2018/6/19  | 1 | 2 | 0 |
| 1 | 26.66 | 1 | 41 lip            | 1 | 1 | 1    | 1 | 1 x | x |   | 0 0000/00/00 | 0 | 2 |   |
| 1 | 26.66 | 1 | 56 buccal muco    | 1 | 1 | 0    | 4 | 4   | 0 | 0 | 0 0000/00/00 | 0 | 2 | 0 |
| 1 | 26.66 | 1 | 65 alveolar ridge | 1 | 1 | 0    | 4 | 4   | 0 | 0 | 0 0000/00/00 | 0 | 2 | 0 |
| 1 | 26.52 | 1 | 53 buccal muco    | 1 | 1 | 1    | 1 | 1   | 0 | 0 | 0 0000/00/00 | 0 | 2 | 0 |
| 1 | 26.56 | 1 | 74 lip            | 1 | 1 | 1    | 2 | 2   | 0 | 0 | 0 0000/00/00 | 0 | 2 | 0 |
| 1 | 26.52 | 1 | 41 buccal muco    | 1 | 1 | 1    | 1 | 1   | 0 | 0 | 0 0000/00/00 | 0 | 2 | 0 |
| 1 | 8.82  | 0 | 40 ant tongue     | 0 | 1 | 1    | 4 | 4   | 3 | 1 | 0 2017/8/14  | 1 | 2 | 1 |
| 1 | 26.89 | 1 | 38 alveolar ridge | 1 | 1 | 1    | 4 | 4   | 0 | 0 | 0 0000/00/00 | 0 | 2 | 0 |
| 1 | 26.95 | 1 | 60 buccal muco    | 0 | 1 | 1    | 4 | 4   | 0 | 0 | 0 0000/00/00 | 0 | 2 | 0 |
| 1 | 26.26 | 1 | 67 ant tongue     | 1 | 1 | 1    | 3 | 1   | 1 | 0 | 0 0000/00/00 | 0 | 3 | 1 |
| 1 | 26.49 | 1 | 57 lip            | 1 | 1 | 1    | 1 | 1   | 0 | 0 | 0 0000/00/00 | 0 | 2 | 0 |
| 1 | 26.43 | 1 | 65 ant tongue     | 1 | 0 | 1    | 1 | 1   | 0 | 0 | 0 0000/00/00 | 0 | 2 | 0 |
| 1 | 12.82 | 0 | 52 ant tongue     | 1 | 0 |      | 4 | 4   | 2 | 0 | 0 2018/2/3   | 1 | 2 | 1 |
| 1 | 26.26 | 1 | 31 ant tongue     | 0 | 0 |      | 1 | 1 x | x |   | 0 0000/00/00 | 0 | 2 |   |
| 1 | 26.49 | 1 | 56 ant tongue     | 0 | 0 | 0    | 1 | 1   | 0 | 0 | 0 0000/00/00 | 0 | 3 | 0 |
| 1 | 8.92  | 0 | 73 buccal muco    | 1 | 1 | 1    | 4 | 4   | 2 | 1 | 0 2017/8/14  | 1 | 2 | 1 |
| 1 | 26.56 | 1 | 66 buccal muco    | 1 | 1 | 1    | 4 | 4   | 2 | 1 | 0 0000/00/00 | 0 | 2 | 1 |
| 1 | 26.43 | 1 | 62 buccal muco    | 1 | 1 | 0    | 2 | 2   | 0 | 0 | 0 0000/00/00 | 0 | 1 | 0 |
| 1 | 26.30 | 1 | 74 hard palate    | 1 | 1 | 1    | 4 | 4   | 0 | 0 | 0 0000/00/00 | 0 | 2 | 0 |
| 1 | 26.23 | 1 | 74 rmt            | 1 | 1 | 1    | 1 | 1   | 0 | 0 | 0 0000/00/00 | 0 | 2 | 0 |
| 1 | 26.30 | 1 | 56 alveolar ridge | 1 | 1 | 1    | 4 | 4   | 2 | 1 | 0 0000/00/00 | 0 | 2 | 1 |
| 1 | 9.44  | 0 | 44 buccal muco    | 1 | 1 | 1    | 4 | 4   | 0 | 0 | 0 0000/00/00 | 0 | 2 | 0 |
| 1 | 1.54  | 0 | 66 hard palate    | 0 | 0 | 0    | 1 | 1   | 0 | 0 | 0 0000/00/00 | 0 | 1 | 0 |
| 1 | 26.39 | 1 | 60 ant tongue     | 1 | 1 | 1    | 1 | 1   | 0 | 0 | 0 0000/00/00 | 0 | 2 | 0 |
| 1 | 26.03 | 1 | 39 ant tongue     | 1 | 1 | 1    | 4 | 4   | 0 | 0 | 0 2018/1/18  | 1 | 2 | 0 |
| 1 | 25.97 | 1 | 67 alveolar ridge | 0 | 1 |      | 4 | 4   | 0 | 0 | 0 0000/00/00 | 0 | 1 | 0 |
| 1 | 26.26 | 1 | 60 buccal muco    | 1 | 1 | 1    | 4 | 4   | 0 | 0 | 0 0000/00/00 | 0 | 2 | 0 |
| 1 | 25.97 | 1 | 33 ant tongue     | 1 | 1 | 1    | 1 | 1   | 0 | 0 | 0 0000/00/00 | 0 | 3 | 0 |
| 1 | 25.97 | 1 | 56 buccal muco    | 1 | 1 | 1    | 4 | 4   | 1 | 1 | 0 0000/00/00 | 0 | 3 | 1 |
| 1 | 26.43 | 1 | 37 buccal muco    | 1 | 0 |      | 1 | 1   | 0 | 0 | 0 2017/7/14  | 1 | 1 | 0 |
| 1 | 26.75 | 1 | 53 buccal muco    | 1 | 1 | 0    | 2 | 2   | 0 | 0 | 0 0000/00/00 | 0 | 1 | 0 |
| 1 | 18.00 | 0 | 53 buccal muco    | 1 | 1 | 1    | 3 | 3   | 0 | 0 | 1 0000/00/00 | 0 | 2 | 0 |
| 1 | 26.07 | 1 | 54 lip            | 1 | 1 | 1 無法 |   | 1 x | x |   | 0 0000/00/00 | 0 | 1 |   |





|   |       |   |    |                |   |   |   |   |     |   |   |              |   |   |   |
|---|-------|---|----|----------------|---|---|---|---|-----|---|---|--------------|---|---|---|
| 1 | 20.33 | 1 | 50 | alveolar ridge | 1 | 1 | 1 | 1 | 0   | 0 | 0 | 0000/00/00   | 0 | 2 | 0 |
| 1 | 5.93  | 0 | 62 | buccal muco    | 1 | 0 |   | 2 | 2 x | x |   | 0 0000/00/00 | 0 | 2 |   |
| 1 | 20.00 | 1 | 81 | alveolar ridge | 1 | 1 | 1 | 4 | 4   | 0 | 0 | 0 0000/00/00 | 0 | 2 | 0 |
| 1 | 19.90 | 1 | 45 | ant tongue     | 1 | 1 | 1 | 1 | 1 x | x |   | 0 0000/00/00 | 0 | 2 |   |
| 1 | 19.90 | 1 | 37 | alveolar ridge | 1 | 1 | 1 | 1 | 1 x | x |   | 0 0000/00/00 | 0 | 2 |   |
| 1 | 19.87 | 1 | 46 | ant tongue     | 1 | 1 | 0 | 3 | 3   | 0 | 0 | 0 0000/00/00 | 0 | 2 | 0 |
| 1 | 20.46 | 1 | 89 | ant tongue     | 1 | 1 | 0 | 2 | 2   | 0 | 0 | 0 0000/00/00 | 0 | 2 | 0 |
| 1 | 12.89 | 0 | 41 | buccal muco    | 1 | 1 | 1 | 1 | 1 x | x |   | 0 2018/1/17  | 1 | 2 |   |
| 1 | 19.38 | 1 | 68 | mouth floor    | 1 | 1 |   | 2 | 2 x | x |   | 0 0000/00/00 | 0 | 2 |   |
| 1 | 19.61 | 1 | 51 | ant tongue     | 1 | 0 | 1 | 1 | 1   | 0 | 0 | 0 0000/00/00 | 0 | 1 | 0 |
| 1 | 19.57 | 1 | 67 | lip            | 1 | 1 | 1 | 2 | 2   | 0 | 0 | 0 0000/00/00 | 0 | 1 | 0 |
| 1 | 19.34 | 1 | 67 | ant tongue     | 1 | 1 |   | 1 | 1 x | x |   | 0 0000/00/00 | 0 | 2 |   |
| 1 | 19.08 | 1 | 55 | alveolar ridge | 1 | 1 |   | 4 | 4   | 0 | 0 | 0 0000/00/00 | 0 | 2 | 0 |
| 1 | 19.08 | 1 | 82 | lip            | 1 | 1 | 1 | 1 | 1 x | x |   | 0 0000/00/00 | 0 | 2 |   |
| 1 | 20.69 | 1 | 69 | lip            | 1 | 1 |   | 1 | 1   | 0 | 0 | 0 0000/00/00 | 0 | 2 | 0 |
| 1 | 4.39  | 0 | 54 | ant tongue     | 1 | 1 | 0 | 4 | 4   | 2 | 1 | 0 2018/2/22  | 1 | 2 | 1 |
| 1 | 18.89 | 1 | 54 | lip            | 1 | 0 | 0 | 4 | 1   | 2 | 0 | 0 0000/00/00 | 0 | 2 | 1 |
| 1 | 18.98 | 1 | 49 | alveolar ridge | 1 | 1 | 0 | 4 | 4   | 0 | 0 | 0 0000/00/00 | 0 | 1 | 0 |
| 1 | 18.95 | 1 | 43 | buccal muco    | 1 | 1 | 1 | 1 | 1   | 0 | 0 | 0 0000/00/00 | 0 | 2 | 0 |
| 1 | 20.46 | 1 | 68 | ant tongue     | 1 | 1 | 1 | 1 | 1 x | x |   | 0 0000/00/00 | 0 | 2 |   |
| 1 | 18.75 | 1 | 74 | buccal muco    | 1 | 1 | 1 | 1 | 1 x | x |   | 0 0000/00/00 | 0 | 2 |   |
| 1 | 18.89 | 1 | 47 | ant tongue     | 1 | 0 |   | 1 | 1   | 0 | 0 | 0 0000/00/00 | 0 | 2 | 0 |
| 1 | 19.61 | 1 | 86 | buccal muco    | 1 | 1 | 0 | 1 | 1 x | x |   | 0 2018/9/7   | 1 | 1 |   |
| 1 | 10.62 | 0 | 66 | ant tongue     | 1 | 1 |   | 4 | 4   | 2 | 0 | 0 0000/00/00 | 0 | 2 | 1 |
| 1 | 18.62 | 1 | 69 | ant tongue     | 1 | 0 |   | 4 | 3   | 2 | 1 | 0 0000/00/00 | 0 | 2 | 1 |
| 1 | 18.49 | 1 | 62 | alveolar ridge | 1 | 1 | 1 | 4 | 4   | 0 | 0 | 0 0000/00/00 | 0 | 2 | 0 |
| 1 | 18.89 | 1 | 53 | buccal muco    | 1 | 1 | 1 | 3 | 3   | 0 | 0 | 0 0000/00/00 | 0 | 2 | 0 |
| 1 | 18.43 | 1 | 52 | lip            | 1 | 1 | 1 | 1 | 1 x | x |   | 0 0000/00/00 | 0 | 1 |   |
| 1 | 19.18 | 1 | 58 | ant tongue     | 1 | 1 | 1 | 1 | 1   | 0 | 0 | 0 2018/8/27  | 1 | 2 | 0 |
| 1 | 18.49 | 1 | 48 | mouth floor    | 1 | 1 | 1 | 2 | 2   | 0 | 0 | 0 0000/00/00 | 0 | 2 | 0 |
| 1 | 19.15 | 1 | 54 | rmt            | 1 | 1 |   | 2 | 2   | 0 | 0 | 0 0000/00/00 | 0 | 2 | 0 |
| 1 | 19.08 | 1 | 73 | hard palate    | 1 | 1 | 1 | 4 | 4 x | x |   | 0 0000/00/00 | 0 | 2 |   |
| 1 | 18.39 | 1 | 72 | buccal muco    | 1 | 1 | 1 | 1 | 1 x | x |   | 0 0000/00/00 | 0 | 1 |   |
| 1 | 18.16 | 1 | 70 | alveolar ridge | 0 | 0 | 1 | 2 | 2   | 0 | 0 | 0 0000/00/00 | 0 | 2 | 0 |
| 1 | 18.13 | 1 | 64 | buccal muco    | 1 | 1 | 1 | 1 | 1 x | x |   | 0 0000/00/00 | 0 | 2 |   |
| 1 | 18.13 | 1 | 66 | ant tongue     | 1 | 0 | 0 | 2 | 2   | 0 | 0 | 0 0000/00/00 | 0 | 2 | 0 |
| 1 | 18.49 | 1 | 59 | buccal muco    | 1 | 1 | 1 | 4 | 4   | 1 | 0 | 0 0000/00/00 | 0 | 2 | 1 |
| 1 | 17.93 | 1 | 35 | ant tongue     | 1 | 1 | 1 | 2 | 2   | 0 | 0 | 0 0000/00/00 | 0 | 3 | 0 |
| 1 | 17.74 | 1 | 65 | alveolar ridge | 1 | 1 | 1 | 4 | 4   | 0 | 0 | 0 0000/00/00 | 0 | 2 | 0 |
| 1 | 18.46 | 1 | 59 | lip            | 1 | 1 |   | 1 | 1 x | x |   | 0 0000/00/00 | 0 | 2 |   |
| 1 | 17.84 | 1 | 72 | buccal muco    | 0 | 1 | 1 | 2 | 2   | 0 | 0 | 0 0000/00/00 | 0 | 2 | 0 |
| 1 | 18.16 | 1 | 62 | alveolar ridge | 1 | 1 | 1 | 1 | 1   | 0 | 0 | 0 0000/00/00 | 0 | 2 | 0 |
| 1 | 18.00 | 1 | 43 | alveolar ridge | 1 | 1 | 1 | 4 | 4   | 0 | 0 | 0 0000/00/00 | 0 | 2 | 0 |
| 1 | 17.74 | 1 | 70 | buccal muco    | 1 | 1 |   | 2 | 2   | 0 | 0 | 0 0000/00/00 | 0 | 2 | 0 |
| 1 | 17.61 | 1 | 50 | lip            | 1 | 1 | 1 | 2 | 2   | 0 | 0 | 0 0000/00/00 | 0 | 2 | 0 |
| 1 | 19.57 | 1 | 55 | buccal muco    | 1 | 1 | 0 | 1 | 1   | 0 | 0 | 0 0000/00/00 | 0 | 1 | 0 |
| 1 | 17.54 | 1 | 81 | ant tongue     | 1 | 0 | 1 | 1 | 1   | 0 | 0 | 0 0000/00/00 | 0 | 2 | 0 |
| 1 | 17.57 | 1 | 53 | ant tongue     | 1 | 1 | 1 | 1 | 1   | 0 | 0 | 0 0000/00/00 | 0 | 2 | 0 |
| 1 | 18.72 | 1 | 56 | alveolar ridge | 1 | 1 |   | 4 | 4   | 2 | 0 | 0 0000/00/00 | 0 | 2 | 1 |
| 1 | 6.98  | 0 | 59 | alveolar ridge | 1 | 1 | 1 | 4 | 4   | 2 | 0 | 0 2018/6/12  | 1 | 2 | 1 |
| 1 | 21.48 | 1 | 60 | ant tongue     | 1 | 1 | 1 | 1 | 1   | 0 | 0 | 0 0000/00/00 | 0 | 2 | 0 |
| 1 | 17.38 | 1 | 57 | buccal muco    | 1 | 1 |   | 4 | 4   | 1 | 1 | 0 0000/00/00 | 0 | 3 | 1 |
| 1 | 9.25  | 0 | 39 | ant tongue     | 1 | 1 | 1 | 4 | 2   | 2 | 1 | 0 2018/6/1   | 1 | 2 | 1 |
| 1 | 17.38 | 1 | 77 | buccal muco    | 1 | 1 | 0 | 2 | 2   | 0 | 0 | 0 0000/00/00 | 0 | 2 | 0 |
| 1 | 27.61 | 1 | 63 | lip            | 1 | 1 |   | 1 | 1   | 0 | 0 | 0 0000/00/00 | 0 | 1 | 0 |
| 1 | 17.34 | 1 | 58 | buccal muco    | 1 | 1 | 1 | 4 | 2   | 2 | 0 | 0 0000/00/00 | 0 | 2 | 1 |
| 1 | 17.51 | 1 | 58 | mouth floor    | 1 | 1 |   | 1 | 1   | 0 | 0 | 0 0000/00/00 | 0 | 3 | 0 |
| 1 | 18.26 | 1 | 66 | lip            | 0 | 0 | 0 | 1 | 1   | 0 | 0 | 0 0000/00/00 | 0 | 2 | 0 |
| 1 | 17.08 | 1 | 57 | mouth floor    | 1 | 1 |   | 4 | 4   | 0 | 0 | 0 0000/00/00 | 0 | 2 | 0 |
| 1 | 17.15 | 1 | 61 | alveolar ridge | 1 | 1 | 1 | 4 | 4   | 0 | 0 | 0 0000/00/00 | 0 | 2 | 0 |
| 1 | 0.92  | 0 | 45 | ant tongue     | 1 | 1 | 1 | 4 | 4   | 2 | 0 | 0 0000/00/00 | 0 | 2 | 1 |
| 1 | 17.08 | 1 | 66 | buccal muco    | 1 | 1 | 1 | 1 | 1   | 0 | 0 | 0 0000/00/00 | 0 | 2 | 0 |
| 1 | 17.02 | 1 | 62 | hard palate    | 1 | 1 | 1 | 1 | 1 x | x |   | 0 0000/00/00 | 0 | 2 |   |
| 1 | 17.02 | 1 | 55 | rmt            | 1 | 1 |   | 4 | 3   | 2 | 0 | 0 0000/00/00 | 0 | 2 | 1 |
| 1 | 18.16 | 1 | 46 | alveolar ridge | 1 | 1 | 1 | 4 | 4   | 1 | 2 | 0 0000/00/00 | 0 | 2 | 1 |
| 1 | 17.38 | 1 | 52 | rmt            | 1 | 1 |   | 4 | 4   | 0 | 0 | 0 0000/00/00 | 0 | 3 | 0 |
| 1 | 17.61 | 1 | 57 | hard palate    | 1 | 1 |   | 4 | 4 x | x |   | 0 0000/00/00 | 0 | 1 |   |
| 1 | 16.82 | 1 | 52 | mouth floor    | 1 | 1 | 1 | 2 | 2   | 0 | 0 | 0 0000/00/00 | 0 | 2 | 0 |
| 1 | 11.70 | 0 | 65 | alveolar ridge | 1 | 1 | 1 | 2 | 2   | 0 | 0 | 0 2018/5/3   | 1 | 2 | 0 |
| 1 | 16.79 | 1 | 69 | buccal muco    | 1 | 1 | 1 | 3 | 2   | 1 | 0 | 0 2018/10/19 | 1 | 2 | 1 |
| 1 | 17.70 | 1 | 51 | ant tongue     | 1 | 1 |   | 4 | 4   | 0 | 0 | 0 0000/00/00 | 0 | 2 | 0 |
| 1 | 16.69 | 1 | 59 | buccal muco    | 1 | 1 | 0 | 1 | 1   | 0 | 0 | 0 0000/00/00 | 0 | 1 | 0 |







|   |       |   |    |                |   |   |   |   |   |            |   |   |   |
|---|-------|---|----|----------------|---|---|---|---|---|------------|---|---|---|
| 1 | 3.11  | 0 | 58 | rmt            | 4 | 4 | 3 | 1 | 1 | 0000/00/00 | 0 | 2 | 1 |
| 1 | 10.16 | 1 | 47 | alveolar ridge | 1 | 1 | x | x | 0 | 0000/00/00 | 0 | 2 |   |
| 1 | 9.90  | 1 | 64 | ant tongue     | 1 | 2 | 0 | 0 | 0 | 0000/00/00 | 0 | 1 | 0 |
| 1 | 10.00 | 1 | 40 | buccal mucosa  | 4 | 4 | 3 | 1 | 0 | 0000/00/00 | 0 | 2 | 1 |
| 1 | 9.54  | 0 | 67 | ant tongue     | 4 | 4 | 3 | 1 | 0 | 2019/5/16  | 1 | 2 | 1 |
| 1 | 9.54  | 1 | 45 | buccal mucosa  | 2 | 2 | 0 | 0 | 0 | 0000/00/00 | 0 | 2 | 0 |
| 1 | 87.34 | 1 | 76 | alveolar ridge | 2 | 1 | x | x | 0 | 0000/00/00 | 0 | 2 |   |
| 1 | 9.67  | 1 | 73 | buccal mucosa  | 1 | 1 | x | x | 0 | 0000/00/00 | 0 | 2 |   |
| 1 | 9.54  | 1 | 70 | alveolar ridge | 4 | 4 | 2 | 0 | 0 | 0000/00/00 | 0 | 2 | 1 |
| 1 | 7.48  | 0 | 61 | ant tongue     | 3 | 2 | 1 | 0 | 0 | 2019/3/26  | 1 | 2 | 1 |
| 1 | 9.44  | 1 | 54 | ant tongue     | 1 | 1 | x | x | 0 | 0000/00/00 | 0 | 2 |   |
| 1 | 9.44  | 1 | 78 | alveolar ridge | 1 | 1 | x | x | 0 | 0000/00/00 | 0 | 2 |   |
| 1 | 9.44  | 1 | 51 | rmt            | 4 | 4 | 0 | 0 | 1 | 2018/12/31 | 1 | 2 | 0 |
| 1 | 9.48  | 1 | 58 | alveolar ridge | 2 | 2 | 0 | 0 | 0 | 0000/00/00 | 0 | 1 | 0 |
| 1 | 9.28  | 1 | 65 | alveolar ridge | 2 | 2 | 0 | 0 | 0 | 0000/00/00 | 0 | 2 | 0 |
| 1 | 9.21  | 1 | 57 | buccal mucosa  | 2 | 2 | 0 | 0 | 0 | 0000/00/00 | 0 | 2 | 0 |
| 1 | 9.18  | 1 | 44 | rmt            | 1 | 1 | x | x | 0 | 0000/00/00 | 0 | 2 |   |
| 1 | 9.21  | 1 | 58 | alveolar ridge | 1 | 1 | x | x | 0 | 0000/00/00 | 0 | 1 |   |
| 1 | 8.98  | 1 | 67 | lip            | 2 | 2 | 0 | 0 | 0 | 0000/00/00 | 0 | 2 | 0 |
| 1 | 8.95  | 1 | 65 | ant tongue     | 4 | 2 | 2 | 1 | 0 | 0000/00/00 | 0 | 2 | 1 |
| 1 | 8.98  | 1 | 76 | buccal mucosa  | 1 | 1 | x | x | 0 | 0000/00/00 | 0 | 2 |   |
| 1 | 8.98  | 1 | 59 | ant tongue     | 4 | 4 | 0 | 0 | 0 | 0000/00/00 | 0 | 2 | 0 |
| 1 | 8.89  | 1 | 56 | ant tongue     | 4 | 2 | 2 | 0 | 0 | 0000/00/00 | 0 | 2 | 1 |
| 1 | 8.85  | 1 | 60 | alveolar ridge | 4 | 4 | 0 | 0 | 0 | 2018/12/20 | 1 | 2 | 0 |
| 1 | 8.85  | 1 | 84 | alveolar ridge | 2 | 2 | 0 | 0 | 0 | 0000/00/00 | 0 | 1 | 0 |
| 1 | 8.89  | 1 | 62 | lip            | 4 | 4 | x | x | 0 | 2018/11/30 | 1 | 2 |   |
| 1 | 9.08  | 1 | 58 | ant tongue     | 2 | 2 | 0 | 0 | 0 | 0000/00/00 | 0 | 2 | 0 |
| 1 | 0.79  | 0 | 72 | alveolar ridge | 4 | 4 | 0 | 0 | 0 | 0000/00/00 | 0 | 2 | 0 |
| 1 | 8.66  | 1 | 40 | ant tongue     | 1 | 1 | 0 | 0 | 0 | 0000/00/00 | 0 | 2 | 0 |
| 1 | 9.02  | 1 | 41 | buccal mucosa  | 4 | 4 | 0 | 0 | 0 | 0000/00/00 | 0 | 2 | 0 |
| 1 | 9.08  | 0 | 50 | buccal mucosa  | 4 | 4 | 0 | 0 | 0 | 2019/2/25  | 1 | 2 | 0 |
| 1 | 9.18  | 1 | 48 | ant tongue     | 3 | 3 | 0 | 0 | 0 | 0000/00/00 | 0 | 2 | 0 |
| 1 | 8.39  | 1 | 70 | buccal mucosa  | 1 | 1 | x | x | 0 | 0000/00/00 | 0 | 2 |   |
| 1 | 3.02  | 0 | 66 | ant tongue     | 4 | 2 | 3 | 1 | 0 | 2018/12/4  | 1 | 2 | 1 |
| 1 | 8.36  | 1 | 71 | ant tongue     | 2 | 2 | 0 | 0 | 0 | 0000/00/00 | 0 | 2 | 0 |
| 1 | 8.30  | 1 | 64 | ant tongue     | 4 | 4 | 0 | 0 | 0 | 0000/00/00 | 0 | 2 | 0 |
| 1 | 8.36  | 1 | 57 | rmt            | 1 | 1 | x | x | 0 | 0000/00/00 | 0 | 2 |   |
| 1 | 8.30  | 1 | 69 | alveolar ridge | 4 | 4 | x | x | 0 | 0000/00/00 | 0 | 2 |   |
| 1 | 8.16  | 1 | 62 | buccal mucosa  | 4 | 4 | 0 | 0 | 0 | 0000/00/00 | 0 | 2 | 0 |
| 1 | 8.07  | 1 | 66 | alveolar ridge | 4 | 4 | 3 | 1 | 0 | 0000/00/00 | 0 | 2 | 1 |
| 1 | 8.16  | 1 | 66 | buccal mucosa  | 1 | 1 | 0 | 0 | 0 | 0000/00/00 | 0 | 2 | 0 |
| 1 | 7.84  | 1 | 57 | alveolar ridge | 1 | 2 | x | x | 0 | 2019/3/15  | 1 | 2 |   |
| 1 | 8.16  | 1 | 74 | ant tongue     | 1 | 1 | 0 | 0 | 0 | 0000/00/00 | 0 | 2 | 0 |
| 1 | 7.64  | 1 | 73 | ant tongue     | 2 | 2 | x | x | 0 | 0000/00/00 | 0 | 2 |   |
| 1 | 7.44  | 1 | 49 | mouth floor    | 2 | 2 | 0 | 0 | 0 | 0000/00/00 | 0 | 2 | 0 |
| 1 | 7.64  | 1 | 60 | ant tongue     | 3 | 1 | 1 | 0 | 0 | 0000/00/00 | 0 | 2 | 1 |
| 1 | 7.48  | 1 | 56 | buccal mucosa  | 1 | 1 | 0 | 0 | 0 | 0000/00/00 | 0 | 2 | 0 |
| 1 | 7.15  | 1 | 65 | buccal mucosa  | 1 | 1 | 0 | 0 | 0 | 0000/00/00 | 0 | 2 | 0 |
| 1 | 6.98  | 1 | 78 | buccal mucosa  | 1 | 1 | x | x | 0 | 0000/00/00 | 0 | 2 |   |
| 1 | 6.95  | 1 | 34 | ant tongue     | 2 | 2 | 0 | 0 | 0 | 0000/00/00 | 0 | 2 | 0 |
| 1 | 6.75  | 1 | 45 | buccal mucosa  | 4 | 2 | 3 | 1 | 0 | 0000/00/00 | 0 | 2 | 1 |
| 1 | 6.75  | 1 | 67 | ant tongue     | 4 | 4 | 2 | 1 | 0 | 2019/2/9   | 1 | 2 | 1 |
| 1 | 6.66  | 1 | 62 | buccal mucosa  | 4 | 3 | 3 | 1 | 0 | 0000/00/00 | 0 | 2 | 1 |
| 1 | 6.98  | 1 | 57 | mouth floor    | 1 | 1 | 0 | 0 | 0 | 0000/00/00 | 0 | 2 | 0 |
| 1 | 6.82  | 1 | 69 | buccal mucosa  | 3 | 3 | 0 | 0 | 0 | 0000/00/00 | 0 | 2 | 0 |
| 1 | 6.43  | 1 | 53 | alveolar ridge | 1 | 1 | x | x | 0 | 0000/00/00 | 0 | 2 |   |
| 1 | 6.30  | 1 | 67 | buccal mucosa  | 2 | 2 | x | x | 0 | 0000/00/00 | 0 | 2 |   |
| 1 | 6.43  | 1 | 68 | ant tongue     | 1 | 1 | x | x | 0 | 0000/00/00 | 0 | 1 |   |
| 1 | 6.30  | 1 | 56 | ant tongue     | 4 | 4 | 0 | 0 | 0 | 0000/00/00 | 0 | 2 | 0 |
| 1 | 2.46  | 0 | 69 | alveolar ridge | 4 | 4 | 3 | 1 | 0 | 2019/1/15  | 1 | 2 | 1 |
| 1 | 6.36  | 1 | 33 | buccal mucosa  | 4 | 2 | 3 | 1 | 0 | 0000/00/00 | 0 | 2 | 1 |
| 1 | 6.49  | 1 | 58 | alveolar ridge | 2 | 2 | 0 | 0 | 0 | 0000/00/00 | 0 | 2 | 0 |
| 1 | 6.00  | 1 | 68 | alveolar ridge | 1 | 1 | x | x | 0 | 0000/00/00 | 0 | 1 |   |
| 1 | 5.90  | 1 | 81 | lip            | 1 | 1 | 0 | 0 | 0 | 0000/00/00 | 0 | 2 | 0 |
| 1 | 6.52  | 1 | 49 | buccal mucosa  | 4 | 3 | 3 | 1 | 0 | 2019/6/25  | 1 | 2 | 1 |
| 1 | 5.80  | 1 | 74 | alveolar ridge | 1 | 1 | x | x | 0 | 0000/00/00 | 0 | 2 |   |
| 1 | 5.74  | 1 | 50 | ant tongue     | 3 | 3 | 0 | 0 | 0 | 0000/00/00 | 0 | 2 | 0 |
| 1 | 5.80  | 1 | 56 | alveolar ridge | 1 | 1 | x | x | 1 | 0000/00/00 | 0 | 2 |   |
| 1 | 5.64  | 1 | 69 | buccal mucosa  | 4 | 4 | 0 | 0 | 0 | 0000/00/00 | 0 | 2 | 0 |
| 1 | 6.30  | 1 | 71 | mouth floor    | 1 | 1 | 0 | 0 | 0 | 2019/6/14  | 1 | 2 | 0 |
| 1 | 5.61  | 1 | 70 | buccal mucosa  | 3 | 3 | 0 | 0 | 0 | 0000/00/00 | 0 | 2 | 0 |
| 1 | 5.54  | 1 | 69 | buccal mucosa  | 1 | 1 | 0 | 0 | 0 | 0000/00/00 | 0 | 1 | 0 |

|   |       |   |    |                |   |   |   |   |   |            |            |   |   |  |
|---|-------|---|----|----------------|---|---|---|---|---|------------|------------|---|---|--|
| 1 | 5.44  | 1 | 57 | ant tongue     | 1 | 1 | x |   | 0 | 0000/00/00 | 0          | 2 |   |  |
| 1 | 5.54  | 1 | 72 | buccal mucosa  | 1 | 1 | x |   | 0 | 0000/00/00 | 0          | 2 |   |  |
| 1 | 5.54  | 1 | 49 | buccal mucosa  | 3 | 3 | 0 | 0 | 0 | 0000/00/00 | 0          | 1 | 0 |  |
| 1 | 6.30  | 1 | 59 | alveolar ridge | 4 | 1 | 2 | 0 | 0 | 0000/00/00 | 0          | 2 | 1 |  |
| 1 | 5.57  | 1 | 45 | ant tongue     | 4 | 4 | 0 | 0 | 0 | 0000/00/00 | 0          | 2 | 0 |  |
| 1 | 5.34  | 1 | 55 | buccal mucosa  | 1 | 1 | x |   | 0 | 2019/4/2   | 1          | 2 |   |  |
| 1 | 5.38  | 1 | 55 | ant tongue     | 3 | 3 | 0 | 0 | 1 | 0000/00/00 | 0          | 1 | 0 |  |
| 1 | 5.38  | 1 | 64 | alveolar ridge | 4 | 4 | 0 | 0 | 0 | 0000/00/00 | 0          | 1 | 0 |  |
| 1 | 5.34  | 1 | 49 | ant tongue     | 2 | 2 | 0 | 0 | 0 | 0000/00/00 | 0          | 2 | 0 |  |
| 1 | 5.57  | 1 | 57 | lip            | 1 | 1 | 0 | 0 | 0 | 0000/00/00 | 0          | 2 | 0 |  |
| 1 | 2.79  | 0 | 74 | alveolar ridge | 4 | 4 | 0 | 0 | 0 | 0000/00/00 | 0          | 2 | 0 |  |
| 1 | 5.18  | 1 | 67 | rmt            | 4 | 4 | 0 | 0 | 0 | 0000/00/00 | 0          | 1 | 0 |  |
| 1 | 5.38  | 1 | 55 | alveolar ridge | 4 | 4 | 0 | 0 | 0 | 0000/00/00 | 0          | 2 | 0 |  |
| 1 | 5.21  | 1 | 52 | buccal mucosa  | 1 | 1 | x |   | 0 | 0000/00/00 | 0          | 1 |   |  |
| 1 | 5.51  | 1 | 48 | buccal mucosa  | 1 | 1 | 0 | 0 | 0 | 0000/00/00 | 0          | 2 | 0 |  |
| 1 | 15.93 | 1 | 58 | hard palate    | 1 | 1 | 0 | 0 | 0 | 0000/00/00 | 0          | 1 | 0 |  |
| 1 | 13.87 | 1 | 69 | alveolar ridgr | 0 | 1 | 1 |   | 1 | 1          | x          | x | 0 |  |
|   |       |   |    |                |   |   |   |   |   | 0          | 0000/00/00 | 0 | 2 |  |
